1 Characterization of the Human Immunodeficiency Virus (HIV-1) Envelope Glycoprotein  
2 Conformational States on Infectious Virus Particles

3  
4 Hanh T. Nguyen<sup>a,b,\*</sup>, Qian Wang<sup>a,b</sup>, Saumya Anang<sup>a,b</sup> and Joseph G. Sodroski<sup>a,b,\*</sup>

5  
6 <sup>a</sup>Department of Cancer Immunology and Virology, Dana-Farber Cancer Institute,  
7 Boston, MA 02215, USA

8 <sup>b</sup>Department of Microbiology, Harvard Medical School, Boston, MA 02215, USA

9  
10  
11  
12  
13  
14  
15  
16

17 \*Corresponding authors:  
18 Hanh T. Nguyen, Ph.D.  
19 Joseph G. Sodroski, M.D.  
20 Dana-Farber Cancer Institute  
21 450 Brookline Avenue, CLS 1010  
22 Boston, MA 02215  
23 Phone: 617-632-3371 Fax: 617-632-4338  
24 Email: hanht\_nguyen@dfci.harvard.edu, joseph\_sodroski@dfci.harvard.edu

25  
26 Running title: HIV-1 Env Conformations on Virus Particles

27  
28 Abstract word count: 250

29

30 **ABSTRACT**

31 Human immunodeficiency virus (HIV-1) entry into cells involves triggering of the viral  
32 envelope glycoprotein (Env) trimer ((gp120/gp41)<sub>3</sub>) by the primary receptor, CD4, and  
33 coreceptors, CCR5 or CXCR4. The pretriggered (State-1) conformation of the mature  
34 (cleaved) Env is targeted by broadly neutralizing antibodies (bNAbs), which are  
35 inefficiently elicited compared with poorly neutralizing antibodies (pNAbs). Here we  
36 characterize variants of the moderately triggerable HIV-1<sub>AD8</sub> Env on virions produced by  
37 an infectious molecular proviral clone; such virions contain more cleaved Env than  
38 pseudotyped viruses. We identified three types of cleaved wild-type AD8 Env trimers  
39 on virions: 1) State-1-like trimers preferentially recognized by bNAbs and exhibiting  
40 strong subunit association; 2) trimers recognized by pNAbs directed against the gp120  
41 coreceptor-binding region and exhibiting weak, detergent-sensitive subunit association;  
42 and 3) a minor gp41-only population. The first Env population was enriched and the  
43 other Env populations reduced by introducing State-1-stabilizing changes in the AD8  
44 Env or by treatment of the virions with crosslinker or the State-1-preferring entry  
45 inhibitor, BMS-806. These stabilized AD8 Envs were also more resistant to gp120  
46 shedding induced by a CD4-mimetic compound or by incubation on ice. Conversely, a  
47 State-1-destabilized, CD4-independent AD8 Env variant exhibited weaker bNAb  
48 recognition and stronger pNAb recognition. Similar relationships between Env  
49 triggerability and antigenicity/shedding propensity on virions were observed for other  
50 HIV-1 strains. Our results show that State-1 Envs on virions can be significantly  
51 enriched by optimizing Env cleavage; stabilizing the pretriggered conformation by Env  
52 modification, crosslinking or BMS-806 treatment; strengthening Env subunit  
53 interactions; and using CD4-negative producer cells.

54 **IMPORTANCE**

55 Efforts to develop an effective HIV-1 vaccine have been frustrated by the inability to  
56 elicit broad neutralizing antibodies that recognize multiple virus strains. Such antibodies  
57 are able to bind a particular shape of the HIV-1 envelope glycoprotein trimer, as it exists  
58 on a viral membrane but before engaging receptors on the host cell. Here, we establish  
59 simple yet powerful assays to characterize the envelope glycoproteins in a natural  
60 context on virus particles. We find that, depending on the HIV-1 strain, some envelope  
61 glycoproteins change shape and fall apart, creating decoys that can potentially divert  
62 the host immune response. We identify requirements to keep the relevant envelope  
63 glycoprotein target for broad neutralizing antibodies intact on virus-like particles. These  
64 studies suggest strategies that should facilitate efforts to produce and use virus-like  
65 particles as vaccine immunogens.

66

67 **KEYWORDS:** membrane Env, native conformation, pretriggered conformation, State 1,  
68 stabilizing mutation, infectious molecular clone, provirus, virus-like particle, immunogen,  
69 vaccine

70

71

## 72 INTRODUCTION

73 Human immunodeficiency virus type 1 (HIV-1) entry into target cells is mediated  
74 by the viral envelope glycoprotein (Env) trimer, which is composed of three gp120  
75 exterior subunits and three gp41 transmembrane subunits (1,2). In infected cells, Env is  
76 synthesized as an uncleaved precursor in the rough endoplasmic reticulum (ER), where  
77 signal peptide cleavage, folding, trimerization, and the addition of high-mannose  
78 glycans take place (3-6). Exiting the ER, the trimeric gp160 Env precursor follows two  
79 pathways to the cell surface (7). In the conventional secretory pathway, the Env  
80 precursor transits through the Golgi compartment, where it is cleaved into gp120 and  
81 gp41 subunits and is further modified by the addition of complex sugars (8-11). These  
82 mature Envs are transported to the cell surface and are incorporated into virions (7). In  
83 the second pathway, the gp160 precursor bypasses the Golgi compartment and traffics  
84 directly to the cell surface; these uncleaved gp160 Envs lack complex carbohydrates  
85 and are excluded from virions (7).

86

87 Single-molecule fluorescence resonance energy transfer (smFRET) experiments  
88 indicate that, on virus particles, the Env trimer exists in three conformational states  
89 (States 1 to 3) (12). From its pretriggered conformation (State 1), the metastable Env  
90 trimer interacts with the receptors, CD4 and CCR5 or CXCR4, and undergoes  
91 transitions to lower-energy states (13-16). Initially, the engagement with CD4 induces  
92 an asymmetric intermediate Env conformation, with the CD4-bound protomer in State 3  
93 and the unliganded protomers in State 2 (17). Binding of additional CD4 molecules to  
94 the Env trimer then induces the full CD4-bound, prehairpin intermediate conformation,  
95 with all three Env protomers in State 3 (12,17). An extended coiled coil consisting of the

96 heptad repeat (HR1) region of gp41 is exposed in the prehairpin intermediate (18-21).  
97 State-3 Env protomers subsequently interact with CCR5 or CXCR4 coreceptors to  
98 trigger the formation of a gp41 six-helix bundle, a process that results in fusion of the  
99 viral and target cell membranes (22-26).

100

101 Env is the only virus-specific molecule exposed on the viral surface and thus  
102 represents the major target for host neutralizing antibodies (27-29). Env strain  
103 variability, heavy glycosylation, conformational flexibility and structural heterogeneity are  
104 thought to contribute to HIV-1 persistence by diminishing the elicitation and binding of  
105 neutralizing antibodies (27-32). During natural infection, high titers of antibodies are  
106 elicited that recognize the gp160 Env precursor, which samples multiple conformations,  
107 and disassembled Envs (shed gp120, gp41 six-helix bundles) (33-45). These antibodies  
108 are poorly neutralizing because they fail to recognize the mature functional Env trimer,  
109 which mainly resides in State 1 (12,36,38,41-49). After years of infection, some HIV-1-  
110 infected individuals generate broadly neutralizing antibodies (bNAbs), most of which  
111 recognize the pretriggered (State-1) Env conformation (12,46-58). Passively  
112 administered monoclonal bNAbs are protective in animal models of HIV-1 infection,  
113 suggesting that the elicitation of bNAbs is an important goal for vaccines (59-63).  
114 Unfortunately, bNAbs have not been efficiently and consistently elicited in animals  
115 immunized with current vaccine candidates, including stabilized soluble gp140 (sgp140)  
116 SOSIP.664 trimers (64-75). Soluble Env trimers often elicit strong strain-restricted  
117 neutralizing antibodies or poorly neutralizing antibodies (pNAbs) targeting the gp120 V3  
118 variable loop, neo-epitopes at the base of the trimer, or holes in the glycan shield  
119 (68,76-84).

120

121 Differences in the antigenicity, glycosylation and conformation of sgp140  
122 SOSIP.664 trimers and the pretriggered (State-1) membrane Env have been observed  
123 (11,85-96). Given the requirement for bNAbs to recognize conserved and  
124 conformationally-specific elements on the pretriggered (State-1) Env (12,46-49), even  
125 small differences from the native State-1 Env might affect immunogen efficacy. First,  
126 differences in the composition of the glycan shield of sgp140 SOSIP.664 trimers and  
127 membrane Env (11,90-93) could hamper the elicitation of bNAbs, most of which  
128 recognize epitopes that include glycan components or are surrounded by glycans that  
129 influence antibody access (28,29,32,97-101). Currently, the only way to obtain a glycan  
130 shield resembling that of the virion Env spike is to produce the Env trimer immunogen in  
131 a membrane-anchored form. Second, membrane Env trimer immunogens also have  
132 the capacity to present the full set of quaternary bNAb epitopes (including the gp41  
133 membrane-proximal external region (MPER)) to the immune system. Although the  
134 MPER is important for the maintenance of the State-1 Env conformation (102-113), the  
135 MPER is removed from sgp140 SOSIP.664 trimers to prevent aggregation (32,114-  
136 117). Finally, immunodominant responses against neo-epitopes artefactually created in  
137 the base of soluble trimers (79,84) could be eliminated by using membrane Env trimer  
138 immunogens. Overall, these considerations indicate that a membrane Env immunogen  
139 may have considerable advantages in presenting a native State-1 Env conformation to  
140 the host immune system.

141

142 Virus-like particles (VLPs) are an attractive platform for HIV-1 membrane Env  
143 immunogens, as virions represent a natural environment for the functional Env trimer

144 and should accurately reproduce the relevant bNAb target. The relative enrichment of  
145 Golgi-passaged Env in virions and VLPs results in Env trimers that are cleaved,  
146 authentically glycosylated and imbedded in a cholesterol/sphingomyelin-rich (lipid raft-  
147 like) membrane, all of which are conducive to the maintenance of a pretriggered (State-  
148 1) conformation (40-45,107-113,118). Although the low Env content of VLPs (mimicking  
149 the natural 10-14 Env spikes per virion (119,120)) is not an absolute barrier to their use  
150 as immunogens, methods for efficient VLP production must be optimized. Of potentially  
151 greater importance is the quality of the Env on VLPs; indeed, several studies have  
152 documented significant Env heterogeneity in VLP preparations (121-137). Proteolytically  
153 mature Env is enriched in virions produced by infected cells; however, systems  
154 overexpressing HIV-1 Gag and Env often produce VLPs with significant levels of  
155 uncleaved Env (7,124-127,134,137). Uncleaved Env, which is flexible and prone to  
156 assume non-State-1 conformations recognizable by pNAbs (40-45), is a highly  
157 undesirable contaminant in any immunogen attempting to focus the host antibody  
158 response on the pretriggered (State-1) Env conformation. Envs with disrupted subunit  
159 interactions, manifest in the extreme case by shedding of gp120 from the trimer,  
160 represent other potential sources of heterogeneity (137-139).

161

162 Here, we study Env conformation on infectious HIV-1 particles, examining both  
163 cleaved and uncleaved Env populations. We compare viral pseudotypes and virions  
164 produced by infectious molecular proviral clones (IMCs). We evaluate the antigenicity  
165 and propensity to shed gp120 for Envs from different HIV-1 strains and Envs modified to  
166 stabilize distinct conformational states. These studies provide useful assays and

167 reagents for the study of Env in a natural membrane context and can guide the  
168 optimization of Env quality in VLPs.

169

## 170 **RESULTS**

### 171 **Comparison of systems transiently expressing virus particles.**

172 To identify a virus-producing system that could yield sufficient levels of cleaved  
173 Env for detailed analysis, we compared 293T cells transiently expressing either  
174 pseudotyped viruses or virions produced by an infectious molecular proviral clone  
175 (IMC). Viruses pseudotyped by the tier-2 primary HIV-1<sub>AD8</sub> Env were produced by  
176 cotransfection of a plasmid expressing the AD8 Env and an *env*-negative provirus  
177 vector, pNL4-3.ΔEnv (originally pNL4-3.Luc.R-E- from the NIH HIV Reagent Program).  
178 In the pNL4-3.AD8 IMC, the NL4-3 *env* gene was replaced by that of AD8. The AD8  
179 Envs produced by both expression systems have a signal peptide and C-terminal gp41  
180 cytoplasmic tail from HXBc2/NL4-3 Envs. As seen in Fig. 1A, pseudotyped virus  
181 particles contained mostly uncleaved Env with little cleaved Env. By contrast, virions  
182 produced by the IMC incorporated at least as much Env per particle, but with ~5.7-fold  
183 more gp120 relative to gp160. The pNL4-3.AD8 IMC also produced virions with  
184 efficiently cleaved Env in HeLa cells (Fig. 1A). Varying the transfected amounts of the  
185 Env-expressing and *env*-negative proviral plasmids failed to increase the gp120:gp160  
186 ratio of the pseudovirus particles to a level comparable to that of the IMC-produced  
187 virions (Fig. 1B). These observations indicated that the IMC system could produce virus  
188 particles with sufficient quantities of cleaved Env for our study.

189



190           Next, we examined the effects of Env cleavage and cytoplasmic tail truncation on  
191 the quantity and quality of Env on virions produced by an IMC. Although the cleavage-  
192 defective AD8 Env was expressed well in the IMC-transfected cells, the uncleaved Env  
193 was incorporated into virions less efficiently than the cleavage-competent AD8 Env (Fig.  
194 1C). Complete truncation of the Env cytoplasmic tail at residue 712 did not affect the  
195 gp120:gp160 ratio on virions, but slightly increased the level of cleaved Env  
196 incorporated.

197

198           To evaluate whether HIV-1 proteins that are not required for virion production  
199 affect Env incorporation, we individually knocked out the expression of reverse  
200 transcriptase (RT), RNase H, integrase (IN), Vif, Vpr, Vpu and Nef (Fig. 1D). None of  
201 these knockouts affected the level of Env incorporation into VLPs or Env cleavage on  
202 the VLPs. As expected (140-142), the infectivity of the virus particles was dramatically  
203 reduced by the introduction of stop codons in the RT, RNase H and IN open reading  
204 frames.

205

### 206 **Characterization of the AD8 Env on virus particles.**

207           Having established the suitability of the IMC expression system for producing  
208 VLPs, we characterized the AD8 Env on the virus particles. Deglycosylation with  
209 PNGase F and Endoglycosidase Hf demonstrated that all the cleaved Env on virus  
210 particles is modified by complex glycans; some of the gp160 glycoprotein on virus  
211 particles is also modified by complex carbohydrates (Fig. 2A). Therefore, all the cleaved  
212 Env and some of the uncleaved Env on these virus particle preparations has passed  
213 through the Golgi network (7). Interestingly, we observed two distinct bands for the

214 deglycosylated gp160 and gp41 proteins, indicating the presence of truncated forms of  
215 these Envs. In parallel studies, we determined that clipping of the Env cytoplasmic tail at  
216 Arg 747 by the viral protease generates these truncated gp160 and gp41 proteins in the  
217 virus particles, a phenomenon that has been previously reported (143,144). This  
218 protease-mediated clipping is enhanced by changes introduced into the AD8 Env  
219 cytoplasmic tail (F752S and F756I) as a result of the chimeric AD8-NL4-3 Env junction  
220 (at the BamHI site of *env*). Reverting these two cytoplasmic tail changes to the  
221 phenylalanine residues at 752 and 756 found in the wild-type HIV-1<sub>AD8</sub> Env minimizes  
222 cytoplasmic tail clipping in the virus particles (see below). The AD8 Env containing Phe  
223 752 and Phe 756, herein designated AD8 Bam, serves as the “wild-type” Env in this  
224 study.

225  
226 To examine the oligomeric composition of the AD8 Bam Envs on virions, purified  
227 virus particles were incubated with the crosslinker bis(sulfosuccinimidyl)suberate (BS3).  
228 As the BS3 concentration was increased, the AD8 Bam Env was efficiently crosslinked  
229 into gel-stable trimers, with no higher-molecular-weight forms observed (Fig. 2B). We  
230 conclude that essentially all the AD8 Bam Envs on these virus particles are assembled  
231 into trimers.

232  
233 To examine the antigenicity of the AD8 Bam Env on virus particles, an  
234 immunoprecipitation assay was performed with a panel of broadly neutralizing  
235 antibodies (bNAbs) and poorly neutralizing antibodies (pNAbs) targeting the gp120 and  
236 gp41 glycoproteins. The bNAbs included 2G12 against gp120 outer-domain glycans  
237 (145), VRC03 against the gp120 CD4-binding site (CD4BS) (146), PG16 and PGT145

238 against quaternary gp120 epitopes at the trimer apex (147,148), PGT151 and 35O22  
239 against the gp120-gp41 interface (149,150), and 10E8.v4 against the gp41 membrane-  
240 proximal external region (MPER) (106). The pNAbs included 19b and 447-52D, 3074,  
241 3869 and 39F against the gp120 V3 region (151,152), 17b and E51 against gp120 CD4-  
242 induced (CD4i) epitopes (153,154), F105 against the gp120 CD4BS (155,156), 902090  
243 against the gp120 V2 region (157), and F240 against a Cluster I epitope on gp41 (158).  
244 C34-Ig is a fusion protein consisting of an immunoglobulin heavy chain and a gp41 HR2  
245 peptide, C34, that targets the gp41 HR1 coiled coil (21). In the antigenicity assay  
246 performed in the absence of the soluble CD4 (sCD4) receptor, 2G12 precipitated both  
247 uncleaved and cleaved Envs, whereas the other bNAbs preferentially recognized the  
248 cleaved Envs (Fig. 2C, -sCD4 panels). All the bNAbs efficiently precipitated both gp120  
249 and gp41 subunits, indicating that the subunits of the AD8 Bam Env trimers recognized  
250 by bNAbs remain associated during detergent solubilization, immunoprecipitation and  
251 washing of the immunoprecipitates. The pNAbs recognized the uncleaved gp160 Env,  
252 as expected (38,39). The pNAbs against the gp120 V3 region and CD4i epitopes also  
253 precipitated the gp120 subunit of the cleaved AD8 Bam Env with surprising efficiency.  
254 Of interest, these pNAbs (19b, 447-52D and 17b) coprecipitated gp41 less efficiently  
255 than the gp120-directed bNAbs. The F240 antibody and C34-Ig recognized gp41 but did  
256 not coprecipitate gp120; these ligands are presumably recognizing gp41 glycoproteins  
257 that are not stably associated with gp120.

258

259 Together these observations suggest that the unliganded AD8 Bam Env on virus  
260 particles was processed in the Golgi apparatus and forms trimers with the following  
261 antigenic properties: (i) the uncleaved Env could be recognized by pNAbs, consistent

262 with its conformational flexibility (39-45); (ii) the cleaved Envs could be recognized by  
263 bNAbs and some V3- and CD4i-directed pNAbs, which recognize gp120 structures  
264 involved in coreceptor binding (151-154,159,160); and (iii) the cleaved Envs that are  
265 recognized by bNAbs exhibit stronger gp120-trimer association in detergent than those  
266 that are recognized by pNAbs, suggesting differences in conformation between the two  
267 cleaved Env populations.

268

269 To examine the effects of receptor binding on the conformation of the AD8 Bam  
270 Env on virus particles, we performed the antigenicity assay in the presence of soluble  
271 four-domain CD4. In these experiments, we utilized conditions that were predetermined  
272 to allow detection of Env conformational changes with only minimal shedding of gp120  
273 (data not shown). Incubation with sCD4 led to a significant increase in the binding of V3-  
274 and CD4i-directed pNAb binding to gp120; this was not accompanied by an increase in  
275 gp41 precipitation for the 19b, 447-52D and 17b pNAbs (Fig. 2C, +sCD4 panels). The  
276 E51 CD4i pNAb precipitated more gp120 and gp41 in the presence of sCD4, suggesting  
277 that complexes of the AD8 Bam Env, sCD4 and E51 antibody remain associated  
278 throughout detergent solubilization and washing. Mild increases in gp41 recognition by  
279 F240 and C34-Ig were also observed following incubation with sCD4, consistent with  
280 sCD4-induced shedding of gp120 from the Env trimers (161).

281

282 The small-molecule HIV-1 entry inhibitor, BMS-806, has been suggested to  
283 stabilize a pretriggered (State-1) conformation in membrane Envs  
284 (12,21,38,95,118,162,163). Chemical crosslinkers like

285 3,3'-dithiobis(sulfosuccinimidyl)propionate (DTSSP) are often used to limit the  
286 conformational dynamics of proteins (39). To examine the effects of these treatments on  
287 the conformation of the AD8 Bam Env on virus particles, we performed the  
288 immunoprecipitation assay in the presence of 10  $\mu$ M BMS-806 or after crosslinking the  
289 viruses with 0.1 mM or 1 mM DTSSP (Fig. 2D). There were two significant differences in  
290 the antigenicity of Env on treated and untreated virus particles. First, both BMS-806  
291 treatment or DTSSP crosslinking significantly reduced gp120 recognition by pNAbs.  
292 Crosslinking with 1 mM DTSSP did not affect pNAb binding to soluble gp120 monomers  
293 (Fig. 2E), ruling out an effect of DTSSP on the pNAb epitopes *per se* and indicating the  
294 importance of the Env trimer context to the observed reduction in pNAb binding. The  
295 results are consistent with BMS-806 and DTSSP treatment reducing spontaneous Env  
296 transitions from a pretriggered (State-1) conformation to more open downstream  
297 conformations recognizable by V3 and CD4i pNAbs. Second, treatment with the higher  
298 concentration of DTSSP led to a reduction in the binding of the PG16 and PGT145  
299 bNAbs, which recognize V2 quaternary structures at the trimer apex (92,147,148,164).  
300 The binding of these bNAbs was not decreased by treatment with BMS-806 or lower  
301 concentrations of DTSSP. The observed reduction in PG16 and PGT145 bNAb binding  
302 after treatment with higher DTSSP concentrations may result from modification of key  
303 gp120 lysine residues shown to be important for the binding of these antibodies  
304 (92,164).

305

### 306 **Effects of cytoplasmic tail clipping on Env conformation.**

307 As mentioned above, clipping of the AD8 Env cytoplasmic tail by the HIV-1  
308 protease is enhanced by the alteration of two phenylalanine residues (Phe 752 and Phe

309 756) near the cleavage site (our unpublished observations). To evaluate the effect of  
310 cytoplasmic tail clipping on Env conformation, we compared the AD8 Env with the AD8  
311 Bam Env, in which the S752F + I756F reversions were introduced. Little gp160 or gp41  
312 clipping was detected in the lysates of cells expressing the AD8 and AD8 Bam Envs  
313 (Fig. 3A), consistent with this clipping being mediated by the HIV-1 protease, which is  
314 activated by dimerization in virion particles (165). On virus particles, approximately 72%  
315 of the AD8 gp41 was clipped, whereas only 28% of the AD8 Bam gp41 was clipped  
316 (Fig. 3A). Despite these differences in the level of clipped gp41, no significant  
317 differences were observed in the sensitivity of the AD8 and AD8 Bam viruses to  
318 neutralization by bNAbs, pNAbs, sCD4-Ig or BNM-III-170, a CD4-mimetic compound  
319 (CD4mc) (166) (Fig. 3B). The qualitative pattern of bNAb and pNAb binding to the AD8  
320 and AD8 Bam virus particles was similar (Fig. 3C). The AD8 Env conformation and  
321 neutralization sensitivity are not apparently affected by protease-mediated gp41 clipping  
322 in virions.

323

### 324 **Effects of State-1-stabilizing and -destabilizing changes on virion Env.**

325 Previous studies have identified HIV-1 Env variants in which the pretriggered  
326 (State-1) conformation is stabilized, rendering the viruses more resistant to cold  
327 inactivation and to inhibition by sCD4 and the CD4mc BNM-III-170 (167). Conversely,  
328 Env variants in which State 1 is destabilized often exhibit global increases in sensitivity  
329 to inactivation at 0° C and to neutralization by sCD4, CD4mcs and pNAbs (107-  
330 113,168-169). To evaluate the effect of State-1-stabilizing and -destabilizing changes on  
331 the antigenicity of Env on viruses, we introduced these changes into the AD8 Bam Env.  
332 Three changes (Q114E, Q576K and A582T) critical to the State-1-stabilized phenotype

333 of a previously reported HIV-1<sub>AD8</sub> Env variant, AE.2 (167), were introduced into the AD8  
334 Bam Env to create the Tri Bam Env. Multiple Env polymorphisms found in the AE.2 Env,  
335 including the State-1-stabilizing A114E, Q567K and A582T changes, were introduced  
336 into the AD8 Bam Env to create the AE.1 Bam Env (see Materials and Methods for  
337 details). The sensitivity of viruses with the AD8 Bam, Tri Bam and AE.1 Bam Envs to  
338 inhibition by sCD4-Ig and the CD4mc BNM-III-170 was measured using TZM-bl target  
339 cells. The sCD4-Ig IC<sub>50</sub> values were 0.076 (AD8 Bam), >20 (Tri Bam) and >20 (AE.1  
340 Bam) µg/ml. The BNM-III-170 IC<sub>50</sub> values were 0.22 (AD8 Bam), >100 (Tri Bam) and  
341 >100 (AE.1 Bam) µM. The viruses with the Tri Bam and AE.1 Bam Envs were also more  
342 resistant to inactivation on ice than viruses with the AD8 Bam Env; after 1 day on ice,  
343 viruses with the AD8 Bam Env lost ~45% of their infectivity, whereas the infectivity of  
344 the viruses with Tri Bam and AE.1 Bam Envs was unaffected (data not shown). These  
345 phenotypes are consistent with State-1 stabilization of the Tri Bam and AE.1 Bam Envs,  
346 relative to the AD8 Bam Env (48,113,167).

347

348 State-1-destabilizing changes (N197S in gp120, NM 625/626 HT and D674N in  
349 gp41) (107) were introduced into the AD8 Bam Env to create the AD8 Bam 197 HT N  
350 Env. The AD8 Bam 197 HT N virus was neutralized by the 19b and 17b pNAbs,  
351 whereas the AD8 Bam virus was not (Fig. 4A). Both viruses were neutralized  
352 comparably by bNAbs. Relative to the AD8 Bam virus, the AD8 Bam 197 HT N virus  
353 was inhibited more effectively by BNM-III-170. These phenotypes are consistent with  
354 State-1 destabilization of the AD8 Bam 197 HT N Env relative to the AD8 Bam Env.

355

356           Compared to the parental AD8 Bam Env, the State-1-stabilized Tri Bam and  
357 AE.1 Bam Envs on virus particles were recognized as well by bNAbs and, importantly,  
358 only weakly by the V3 and CD4i pNAbs (Fig. 4B). Soluble forms of the gp120  
359 glycoproteins from the AD8 Bam, Tri Bam and AE.1 Bam Envs were precipitated by  
360 these pNAbs efficiently (Fig. 4C), indicating that the observed reduction in pNAb binding  
361 to the State-1-stabilized Envs on virus particles was not a result of disruption of the  
362 epitopes. As a control in this experiment, the recognition of the AE.1 gp120, which  
363 contains an R315K change in the V3 region (167), by the 447-52D pNAb was  
364 decreased. The R315K change does not affect the binding of the other V3-directed  
365 pNAbs (47,170) used in our study.

366

367           Interestingly, the antigenicity of the AD8 Bam 197 HT N Env displayed the  
368 opposite trends. Compared with the parental AD8 Bam Env, the AD8 Bam 197 HT N  
369 Env was recognized less well by bNAbs (PG16, PGT145 and 35O22) with epitopes  
370 dependent on quaternary Env structure (Fig. 4B). Conversely, recognition of the AD8  
371 Bam 197 HT N Env by V3 and CD4i pNAbs was relatively increased.

372

373           To examine whether the antigenic differences between these State-1-stabilized  
374 and -destabilized Envs might be influenced by the oligomeric state of the Env variants,  
375 virus particles containing the Env variants were crosslinked with the BS3 crosslinker.  
376 The parental AD8 Bam, State-1-destabilized AD8 Bam 197 HT N and State-1-stabilized  
377 Tri Bam envelope glycoproteins were crosslinked to trimers with equal efficacy (Fig.  
378 4D).

379



380 To summarize, HIV-1 Envs with varying degrees of State-1 stability retain trimeric  
381 configurations on virus particles. The spontaneous exposure of V3 and CD4i pNAb  
382 epitopes on the cleaved Env trimer is inversely related to the degree of State-1 stability.  
383 State-1-stabilized Envs effectively maintain the epitopes recognized by bNAbs,  
384 particularly those dependent on quaternary conformation. By contrast, the State-1-  
385 destabilized Env was recognized inefficiently by bNAbs.

386

### 387 **Shedding of gp120 from virus particles.**

388 The non-covalent association of gp120 with the Env trimer is prone to disruption,  
389 either spontaneously or in response to the binding of ligands (sCD4, CD4-mimetic  
390 compounds) that induce Env conformations downstream of State 1 (137-139,161,171).  
391 We set out to study the shedding of gp120 from Envs with different degrees of State-1  
392 stability on virus particles produced by IMCs. To establish optimal assay conditions, we  
393 measured gp120 shedding from the AD8 Bam Env after a one-hour incubation with  
394 different concentrations of sCD4 or the CD4mc BNM-III-170 at various temperatures  
395 (Fig. 5A). Both sCD4 and BNM-III-170 induced gp120 shedding in a dose-dependent  
396 manner. For both sCD4 and BNM-III-170, shedding of gp120 was slightly more efficient  
397 at lower temperatures than at 25° or 37°C. At the highest sCD4 and BNM-III-170  
398 concentrations tested, ~6-10% of the total gp120 on the virus particles was shed after a  
399 1-hour incubation at 0° or 4°C.

400

401 The resistance of closely matched HIV-1 Env variants to inhibition by CD4mcs is  
402 a valuable indicator of the degree of State-1 stabilization (167). To determine whether  
403 CD4mc-induced gp120 shedding correlates with this functional phenotype, we

404 compared BNM-III-170-induced shedding of gp120 from virus particles with the AD8  
405 Bam, AD8 Bam 197 HT N, Tri Bam and AE.1 Bam Envs (Fig. 5B). Both State-1-  
406 stabilized Envs, Tri Bam and AE.1 Bam, were less sensitive to gp120 shedding induced  
407 by BNM-III-170 than the AD8 Bam Env.

408

409 In HIV-1 variants with closely matched Envs, resistance to cold inactivation is  
410 another useful indicator of the degree of State-1 stabilization (167,172,173). We sought  
411 to evaluate the relationship between Env conformation and the spontaneous shedding  
412 of gp120 at different temperatures. In initial experiments, we incubated virus particles  
413 with the AD8 Bam Env at different temperatures for various times and measured the  
414 amount of shed gp120 (Fig. 5C). Shedding of gp120 was significantly greater after  
415 incubation of the viruses on ice than at higher temperatures. Thus, the inactivation of  
416 the infectivity of viruses with the AD8 Bam Env by incubation on ice coincides with  
417 destabilization of the Env trimer and loss of the gp120 subunit.

418

419 To evaluate whether HIV-1 Envs stabilized in a pretriggered (State-1)  
420 conformation could better resist cold-induced gp120 shedding, we took two approaches.  
421 First, we incubated viruses with the AD8 Bam Env on ice in the absence or presence of  
422 BMS-806, which stabilizes the State-1 Env conformation (12,21,38,95,118). Treatment  
423 with BMS-806 effectively prevented gp120 shedding from the AD8 Bam Env even after  
424 an 8-day incubation on ice (Fig. 5D). Second, we compared gp120 shedding at 0° C for  
425 viruses with State-1-stabilizing and -destabilizing changes in Env. The State-1-stabilized  
426 Envs, Tri Bam and AE.1 Bam, retained gp120 even after a 6-day incubation on ice,

427 whereas the parental AD8 Bam and the State-1-destabilized AD8 Bam 197 HT N Envs  
428 shed much of their gp120 subunits during this time period (Fig. 5E).

429

430 To summarize, incubation at 0°C leads to destabilization of the HIV-1 AD8 Bam  
431 Env trimer on virus particles, resulting in gp120 shedding. Envs stabilized in a  
432 pretriggered (State-1) conformation are better able to resist the trimer-destabilizing  
433 effects of exposure to cold. Measurements of gp120 shedding from virus particles  
434 correlate well with virus functional phenotypes and can serve as useful indicators of Env  
435 conformational state, even for Envs with limited ability to support HIV-1 infection.

436

#### 437 **Effects of 0°C incubation on the antigenicity of a State-1-stabilized Env.**

438 Although the State-1-stabilized Tri Bam Env did not shed gp120 after prolonged  
439 incubation on ice, other more subtle changes to the conformation of the Tri Bam Env  
440 trimer might have resulted from cold exposure. To address this, we compared the  
441 antigenicity of the Tri Bam Env after a 7-day incubation on ice with that of a Tri Bam Env  
442 not incubated on ice (Fig. 6). Exposure to 0°C for 7 days had little effect on the amount  
443 of Tri Bam Env on the virus particles or on its recognition by bNAbs or pNAbs. We note  
444 that the V3 and CD4i pNAbs mainly recognize the uncleaved Tri Bam Env on the virus  
445 particles, and any low-level recognition of gp120 by these antibodies was not  
446 accompanied by coprecipitation of gp41. We conclude that the effects of the Q114E,  
447 Q567K and A582T changes on Env conformation allow the virion Env trimers to  
448 withstand cold stress for at least one week.

449

#### 450 **Characterization of virion Envs from other HIV-1 strains.**

451           The studies above utilized closely matched HIV-1<sub>AD8</sub> Env variants with amino  
452 acid residue changes that specifically alter Env triggerability (107,167); analysis of these  
453 variants identified useful phenotypic indicators of the degree of State-1 stabilization. To  
454 examine whether these conformational indicators could be generalized to Envs from  
455 other HIV-1 strains, we studied the laboratory-adapted, tier-1 HIV-1<sub>NL4-3</sub> (clade B); the  
456 primary, tier-2/3 HIV-1<sub>JR-FL</sub> (clade B); and the primary, tier-2/3 HIV-1<sub>BG505</sub> (clade A). HIV-  
457 1<sub>JR-FL</sub> and HIV-1<sub>BG505</sub> Envs are of particular interest because pseudoviruses with these  
458 Envs exhibit levels of resistance to cold inactivation and CD4mc inhibition that are  
459 comparable to those of pseudoviruses with the AD8 Env containing the State-1-  
460 stabilizing changes examined here (167). The JR-FL E168K Env variant was used in  
461 the analysis of Env antigenicity as the E168K change in the gp120 V2 region allows  
462 recognition by the V2 quaternary bNAbs, PG16 and PGT145, without detectable effects  
463 on other properties of the HIV-1<sub>JR-FL</sub> Env (92,147,148,164). Comparing the antigenicity  
464 of the Env variants on virus particles (Fig. 7A), we noted trends similar to those  
465 observed for the AD8 Bam Env variants: (i) the cleaved Env in the more triggerable  
466 NL4-3 Env was not efficiently precipitated by the bNAbs (PG16, PGT145, PGT151 and  
467 35O22) that recognize epitopes dependent on quaternary Env structure; nonetheless,  
468 the NL4-3 virus was efficiently neutralized by the PG16 and PGT145 antibodies (data  
469 not shown); (ii) the cleaved JR-FL E168K Env was precipitated by all the bNAbs but,  
470 with the exception of weak precipitation by the 19b and 447-52D V3 pNAbs, not by most  
471 pNAbs; and (iii) although the level of cleaved BG505 Env on the virus particles was very  
472 low, this small amount of cleaved Env was detected better by the bNAbs than by  
473 pNAbs. Deglycosylation of the precipitated BG505 Env proteins confirmed the efficient  
474 recognition of gp120 by all the bNAbs tested, with detectable recognition of gp120 by

475 the 19b and 447-52D V3 pNABs and by the 17b and E51 CD4i pNABs (data not shown).  
476 We confirmed that the pNAB epitopes are present on the gp120 glycoproteins of these  
477 three HIV-1 strains (with the exception of the 19b V3 epitope on the NL4-3 Env) (Fig.  
478 7B).

479

480 We examined the shedding of gp120 from viral particles containing Envs from the  
481 different HIV-1 strains in response to the CD4mc BNM-III-170 and to ice exposure (Fig.  
482 7C). The NL4-3 Env shed gp120 efficiently following incubation with BNM-III-170 or on  
483 ice. By contrast, the JR-FL and BG505 Envs shed gp120 minimally in response to the  
484 CD4mc or cold exposure. These gp120 shedding efficiencies correlate with the  
485 susceptibility of these viruses to cold inactivation or inhibition by BNM-III-170 (167).  
486 Thus, the antigenicity and gp120 shedding assays using IMC-generated virus particles  
487 revealed important distinctions among Envs with different triggerability levels, even for  
488 Envs derived from different HIV-1 strains and clades. Additionally, viruses produced  
489 from cells transfected with IMCs may demonstrate improved Env proteolytic processing  
490 in cases, e.g., the JR-FL and BG505 Envs, where low levels of Env cleavage have been  
491 observed in the transfected cells (Fig. 7D) (167). However, even when produced by an  
492 IMC, the BG505 Env still displayed a very low level of cleavage in cell lysates and on  
493 virus particles. Therefore, a high level of cleaved Env on virus particles is one criterion  
494 that could be used to prioritize HIV-1 strains for structural and immunogenicity studies of  
495 membrane Envs.

496

497 **Characterization of Env in virions produced from infected T cells.**

498           The above analyses were performed with virus particles produced transiently  
499 from transfected 293T cells. To examine whether the observed Env phenotypes would  
500 also be associated with virions produced from infected T cells, we analyzed the  
501 antigenicity of the AD8 Bam Env and the E.1 Bam Env in virions produced from infected  
502 C8166-R5 cells. C8166-R5 cells are human CD4<sup>+</sup> T lymphocytes transformed by human  
503 T-cell leukemia virus (HTLV-I) and transduced with a vector expressing human CCR5  
504 (174). The E.1 Bam Env is identical to the AE.1 Bam Env except that one of the State-1-  
505 stabilizing changes, A582T, has been reverted (167). The E.1 Bam Env was studied  
506 here instead of the Tri Bam or AE.1 Bam Envs because the E.1 Bam Env was more  
507 infectious in C8166-R5 cells, but nonetheless retained most State-1-stabilized  
508 phenotypes (reference 167 and data not shown). The AD8 Bam Env on infectious  
509 virions produced in C8166-R5 cells displayed an antigenic pattern similar to that of the  
510 virus particles produced from transfected 293T cells, i.e., gp120 was recognized by  
511 bNAbs and V3 and CD4i pNAbs, but the coprecipitation of gp41 was less efficient for  
512 the pNAbs than for the bNAbs (Fig. 8A). Relative to the antigenicity of AD8 Bam Env,  
513 the cleaved E.1 Bam Env on virions demonstrated strong bNAb binding and decreased  
514 pNAb binding. The consistency between the antigenicity of Envs on viruses produced  
515 from transfected 293T cells and an infected T cell line support the generality and  
516 intrinsic nature of the observed Env phenotypes.

517

518           In multiple repeat experiments, we noted that the binding of the cleaved E.1 Bam  
519 Env by V3 and CD4i pNAbs was variable and, in some cases, at a level comparable to  
520 that of the AD8 Bam Env (see average values in Fig. 8A, right panel). Because C8166-  
521 R5 cells express CD4 that could potentially interact with HIV-1 Env (175,176), we tested

522 whether CD4 coexpression could affect the conformation of a State-1-stabilized Env on  
523 virus particles. To that end, we transfected 293T cells with the E.1 Bam IMC with or  
524 without a plasmid expressing human CD4. Analysis of the E.1 Bam Env antigenicity on  
525 virus particles showed that coexpression of CD4 resulted in modest increases in the  
526 binding of V3 and CD4i pNAbs to gp120, without accompanying increases in the  
527 coprecipitation of gp41 (Fig. 8B). We conclude that coexpression of CD4 in cells  
528 producing virus particles can in some circumstances lead to an increased sampling of  
529 non-State-1 Env conformations on the viral particles.

530

## 531 **DISCUSSION**

532 The development of an effective AIDS vaccine has been frustrated by the  
533 inefficiency with which current Env immunogens, including stabilized soluble trimers,  
534 elicit neutralizing antibodies with breadth against primary HIV-1 strains (64-75). The  
535 evolution of bNAbs during natural HIV-1 infection likely is driven by the mature (cleaved)  
536 State-1 Env trimer on viral or cell membranes. The association of Env with the  
537 membrane is important for maintaining a State-1 Env conformation and for the correct  
538 composition of Env glycans (11,90-93,102-113), both of which can potentially influence  
539 the binding of bNAbs and their precursors.

540

541 Virus-like particles (VLPs) offer a means to access native, functional HIV-1 Envs  
542 in a natural membrane context. Indeed, several groups have explored VLP Env  
543 composition, antigenicity, structure, dynamics and immunogenicity (12,95,118,121-  
544 137,177-179). Structural and conformational heterogeneity in VLP Envs complicates  
545 efforts to characterize the virion spike and to develop these membrane Envs as

546 immunogens presenting a pretriggered (State-1) conformation to the immune system.  
547 One important source of conformational heterogeneity is the uncleaved gp160 Env,  
548 which is flexible and binds multiple pNAbs (40-45). In this study, we utilized infectious  
549 molecular clones (IMCs) to produce virus particles with sufficient levels of cleaved HIV-1  
550 Env for detailed analysis of Envs on virus particles. In this respect, virus particles  
551 produced by IMCs were superior to pseudotyped viruses, where Env cleavage was  
552 inefficient and not sufficiently increased by lowering the amount of Env-expressing  
553 plasmid transfected with the Gag-expressing plasmid. Our results are consistent with  
554 those of previous studies (136,180). In one such study (136), extremely low ratios (e.g.,  
555 1:80) of Env:Gag expressor plasmids were required to achieve a level of Env cleavage  
556 comparable to that produced by an IMC. At such low Env:Gag ratios, the low levels of  
557 Env on the VLPs create additional impediments to the characterization of the virion  
558 Envs. In addition to the use of IMCs, we also utilized Western blotting that could  
559 distinguish the phenotypes of cleaved and uncleaved Envs; this distinction is essential  
560 for characterizing the conformations of the different Env populations present on virus  
561 particles.

562

563 In contrast to pseudotyped viruses, IMC-produced virus particles generally  
564 exhibited levels of cleaved Env similar to those in virions produced from infected T cells.  
565 The infectivity of IMC-produced viruses can be inactivated by the introducing  
566 conservative changes that eliminate reverse transcriptase, RNAse H or integrase  
567 expression without compromising the enrichment of cleaved Env on the virus particles.  
568 Disruption of *vif*, *vpr*, *vpu* and *nef* also did not affect Env amount or level of cleavage on  
569 the virus particles (Fig.1D). Combinations of these inactivating mutations could be



570 introduced into IMCs to minimize the possibility of infectious virus in VLP preparations.  
571 Vpu and Nef contribute to the down-regulation of CD4-Env complexes on the surface of  
572 infected cells and virions, and therefore could be of value in VLP-producing cells that  
573 express CD4 (176,181-185). However, we found that even with intact *vpu* and *nef*  
574 genes on the IMC, CD4 expression in the producer cell increased the exposure of CD4-  
575 induced pNAb epitopes on the VLP Env (Fig. 8B). Using CD4-negative producer cells  
576 avoids this potential problem. The HIV-1 protease, which was left intact on the IMCs to  
577 allow proteolytic maturation of the VLPs, can also clip the cytoplasmic tail of Env from  
578 some HIV-1 strains (143,144). We found that this cytoplasmic tail clipping was  
579 enhanced by chimerism of the HIV-1<sub>AD8</sub> Env construct near the cleavage site and could  
580 be remedied by changes near the junction sequences. Nonetheless, cytoplasmic tail  
581 clipping exerted no detectable effect on AD8 Env antigenicity or neutralization  
582 sensitivity. These results are consistent with previous studies showing that complete  
583 truncation of the HIV-1<sub>AD8</sub> Env cytoplasmic tail does not detectably affect virus  
584 neutralization sensitivity (94).

585

586 IMC-produced virus particles with high levels of cleaved Env allowed direct  
587 analysis of the virion Env population, essentially all of which is trimeric. The antigenicity  
588 and gp120 shedding analyses revealed the existence of at least three populations of  
589 cleaved AD8 Env trimers (Fig. 9A):

590

591 1) Pretriggered (State-1) Env – This cleaved Env population is marked by its  
592 recognition by bNAbs but not pNAbs. This Env population is maintained after treatment  
593 with BMS-806 and crosslinkers and is increased by Env changes that stabilize the

594 pretriggered conformation (167). Notably, as seen in the ability of gp120- or gp41-  
595 directed bNAbs to coprecipitate the other subunit, the Env trimers in this population are  
596 stable in detergent lysates. This Env population also is more resistant to gp120  
597 shedding induced by incubation on ice or with CD4mc. Lower Env triggerability and  
598 increased State-1 occupancy are often associated with increased intersubunit  
599 interactions that stabilize the trimer (38,167). In agreement with this, BMS-806-treated  
600 and State-1-stabilized Envs are relatively resistant to gp120 shedding after exposure to  
601 0° C or detergent. The cleaved, State-1-stabilized Tri Bam Env on the virus surface  
602 maintained its antigenicity for at least one week on ice.

603

604 2) Envs in more open conformations – This cleaved Env population is marked by its  
605 recognition by V3 and CD4i pNAbs. This Env population is decreased by treatment with  
606 BMS-806 or crosslinkers or by the introduction of State-1-stabilizing changes in Env  
607 (167). Conversely, this Env population is increased by State-1-destabilizing Env  
608 changes that promote CD4 independence (107), by the binding of sCD4 to Env on virus  
609 particles, and by CD4 coexpression in virus-producing cells. These cleaved Env trimers  
610 apparently represent more open conformations downstream of State 1. The intersubunit  
611 interactions in these trimers are more labile than those in the State-1 Envs, as gp120-  
612 directed pNAbs less efficiently coprecipitate gp41 in detergent lysates.

613

614 3) gp41 molecules not detectably associated with gp120 – This gp41-only population is  
615 marked by its recognition by C34-Ig and the F240 pNAb, which detect gp41 molecules  
616 after gp120 has been shed (21,158,186). As seen in our results, the gp41 from this  
617 population is precipitated by C34-Ig and F240, but gp120 is not coprecipitated. State-1

618 stabilization by Env changes or BMS-806 treatment reduces gp120 shedding and  
619 decreases the level of gp41-only Envs, implying that the gp41-only population increases  
620 under conditions in which more open Env conformations are favored.

621

622 Our results support a model in which the triggerability or reactivity of Env variants  
623 determines the spontaneous occupancy of the three cleaved Env populations on the  
624 virus particles (12,48,49,107,113,167-169) (Fig. 9B). Virions with the tier-2 AD8 Bam  
625 Env, with an intermediate level of triggerability (167), contain all three cleaved Env  
626 populations in the following order of decreasing amount: pretriggered  $\geq$  open  $\ggg$  gp41-  
627 only. Virions with the more triggerable tier-1 NL4-3 Env and the CD4-independent AD8  
628 Bam 197 HT N Env contain all three populations in the following order of decreasing  
629 amount: open  $>$  pretriggered  $\ggg$  gp41-only. Virions with the State-1-stabilized Tri Bam  
630 and AE.1 Bam Envs and virions with the tier-2/3 JR-FL and BG505 Envs contain only  
631 two populations in the following order of decreasing amount: pretriggered  $>$  open. We  
632 suggest that the lower triggerability or reactivity of this last group of Env variants is  
633 related to the higher activation energy barrier separating the pretriggered (State-1)  
634 conformation and downstream, more open conformations, leading to higher occupancy  
635 of the pretriggered state on the virus particles (107,168).

636

637 The degree to which the cleaved Env trimers on virus particles sample State 1 or  
638 more open conformations is subject to modulation (Fig. 9C). CD4 binding promotes  
639 HIV-1 entry by stimulating Env transitions from State 1 to downstream conformations  
640 (12). Spontaneous transitions from the pretriggered (State-1) conformation of Env can  
641 be inhibited by treatment of the virions with BMS-806 (21), by crosslinking, or by the

642 introduction of State-1-stabilizing changes in Env. Conversely, treatment of the virions  
643 with sCD4 or a CD4mc, or the introduction of State-1-destabilizing changes in Env can  
644 promote Env transitions from State 1 to more open downstream conformations. These  
645 downstream Env conformations are recognized by pNABs that bind the coreceptor-  
646 interactive region of gp120, consistent with their potential relevance to virus entry  
647 events following CD4 engagement. We note that crosslinking reduces the binding of  
648 these pNABs to the unliganded AD8 Env (Fig. 2D), suggesting that Env flexibility  
649 contributes to the spontaneous exposure of the pNAb epitopes. This is consistent with  
650 smFRET observations indicating that State-1 Envs spontaneously and reversibly  
651 sample conformations that resemble the States 2 and 3 induced by CD4 (12). If these  
652 epitopes are accessible on the unliganded virion Env, why don't the V3 and CD4i  
653 pNABs neutralize HIV-1<sub>AD8</sub>? The lability of gp120-trimer association observed for the  
654 AD8 Env population that spontaneously exposes pNAb epitopes hints that these Envs  
655 may be inherently dysfunctional or that their functionality is short-lived. Poorly functional  
656 Envs with exposed pNAb epitopes have been previously observed on VLPs and were  
657 shown to be more susceptible to digestion with a cocktail of proteases (127). Like the  
658 short-lived Env intermediates induced by sCD4 or CD4mcs (187,188), spontaneously  
659 sampled, open Env conformations may be labile. To maintain some infectivity, highly  
660 triggerable Envs like AD8 Bam 197 HT N may need to acquire adaptive changes to  
661 minimize the lability of downstream Env intermediates during virus infection (107). Of  
662 note, the complexes formed by virion Env with CD4 on the target cell membrane were  
663 found to be significantly more stable than those formed by sCD4 (187).  
664

665           Our study provides guidance for efforts to improve VLPs as immunogens that  
666 present the membrane-anchored, pretriggered (State-1) conformation of HIV-1 Env to  
667 the immune system. The first requirement is that VLPs should contain as little gp160 as  
668 possible. Uncleaved Env on VLPs or VLP-producing cells is conformationally flexible  
669 and could divert desirable immune responses by presenting immunodominant pNAb  
670 epitopes to the immune system. Although cleaved Env is generally enriched in virions,  
671 some uncleaved Env is found in most VLP preparations. Previous studies with A549  
672 cells stably producing Gag-mCherry VLPs indicated that essentially all of the uncleaved  
673 VLP Env passed through the Golgi apparatus (7); the uncleaved Env on VLPs produced  
674 in that system was modified by complex carbohydrates resembling those on mature  
675 Env. In VLPs produced transiently from 293T cells in this study, some of the uncleaved  
676 Env lacks complex glycans, indicating that it may have bypassed the Golgi apparatus.  
677 One likely source of this uncleaved Env may be cellular vesicles that contaminate the  
678 VLP preparation. The level of vesicle contaminants could be influenced by the choice of  
679 producer cells, transient versus stable transfection and the VLP production system. If  
680 complete elimination of the uncleaved gp160 Env in VLP preparations is not possible,  
681 BMS-806 and long-acting BMS-806 analogues could be used to reduce the exposure of  
682 pNAb epitopes on the residual gp160 (38,118).

683

684           The second requirement is that cleaved Env should be in a State-1 conformation  
685 with minimal spontaneous exposure of pNAb epitopes. We found that even cleaved  
686 HIV-1 Env trimers of the tier-2 AD8 Env spontaneously exposed V3 and CD4i pNAb  
687 epitopes related to the coreceptor-binding region of gp120. The extent of this exposure  
688 appears to be related to Env triggerability, i.e., the propensity of Env to make transitions

689 from the pretriggered (State-1) conformation to downstream conformations (107,168).  
690 State-1-stabilizing Env changes, BMS-806 treatment and crosslinking (or combinations  
691 of these measures) can decrease the amount of the more open cleaved Envs trimers on  
692 the VLPs, even beyond that found in natural HIV-1 strains. As State-1 stabilization  
693 improves, Env typically demonstrates decreased ability to mediate virus infection, as  
694 expected for lower triggerability (107,167). Assays dependent on functional virus (e.g.,  
695 antibody neutralization, cold sensitivity, inhibition by sCD4 or small-molecule entry  
696 blockers) cannot be used to study such highly State-1-stabilized Envs. The VLP  
697 antigenicity and gp120 shedding assays developed here do not require the virus to be  
698 functional, and thus can be applied in broad context to monitor progressive  
699 improvements in the stabilization of the pretriggered conformation of Envs from multiple  
700 HIV-1 strains. Fortunately, bNAbs and pNAbs broadly reactive with the Envs from  
701 diverse HIV-1 are available for the antigenicity analyses, and thus the antigenicity of  
702 different HIV-1 strains can be directly compared to allow Env conformations to be  
703 deduced.

704

705         The third requirement is that shedding of gp120 from the cleaved Env on VLPs  
706 should be minimized. Viruses with the AD8 Bam Env spontaneously shed gp120 after  
707 incubation at various temperatures (Fig. 5). Trimer stability after incubation of the VLPs  
708 on ice is a better indicator of State-1 stabilization than at higher temperatures  
709 (167,172,173). The detrimental effects of ice formation at near-freezing temperatures  
710 apparently stress the non-covalent intersubunit interactions on which Env trimer integrity  
711 depends (189-191). Further studies of the longevity of State-1-stabilized Env trimers at  
712 37°C would be relevant to their inclusion in VLP immunogens, particularly in the

713 presence of adjuvants. Encouragingly, State-1-stabilized Envs like the Tri Bam and  
714 AE.1 Bam Envs and the natural JR-FL Env were remarkably resistant to gp120  
715 shedding. Using these Envs in VLPs provides alternatives to the use of artificial inter-  
716 subunit disulfide bonds like SOS (192-194), which has been reported to destabilize  
717 State 1 in virion Envs (95, 118).

718

719 The fourth requirement is that VLP-producing cells should not coexpress CD4.  
720 CD4 expression in the VLP-producing cells was found to exert subtle effects on the  
721 exposure of pNAb epitopes on the VLP Envs, even for Vpu<sup>+</sup> Nef<sup>+</sup> proviruses (Fig. 8B).  
722 The use of CD4-negative cells to produce VLPs enriched in State-1 Envs seems  
723 advisable.

724

725 Advances in understanding the pretriggered (State-1) conformation of HIV-1  
726 Envs and learning how to preserve this labile state, together with the assays established  
727 here, should assist efforts to elicit effective antibody responses with VLP and other  
728 immunogen formulations.

729

730 **MATERIALS AND METHODS**

731 Plasmids. The HIV-1<sub>AD8</sub>, HIV-1<sub>AE.2</sub> and HIV-1<sub>JR-FL</sub> *env* sequences for the construction of  
732 IMCs were obtained from the respective pSVIIIenv expression vectors (167). Relative to  
733 the AD8 Env, the AE.2 Env contains the following changes: Q114E, R166K, R178K,  
734 R252K, R315K, R419K, R557K, Q567K, A582T, R633K, Q658K, A667K and N677K.  
735 The Kpn I – BamHI *env* fragments from pSVIIIenv AD8 and pSVIIIenv AE.2 were  
736 introduced into the pNL4-3 IMC, using an intermediary vector, pE7SB-NL4-3. The  
737 pE7SB-NL4-3 plasmid contains the Sal I – BamHI fragment of the HIV-1<sub>NL4-3</sub> provirus,  
738 which includes the *tat*, *rev*, *vpu* and 5' *env* genes. The Kpn I – BamHI *env* fragments  
739 from the pSVIIIenv plasmids were cloned into the corresponding sites of pE7SB-NL4-3  
740 using Long Ligase (Takara) following the manufacturer's protocol. The Sal I – BamHI  
741 fragments from the pE7SB-NL4-3 intermediate plasmids were cloned into the  
742 corresponding sites of pNL4-3, which contains the infectious HIV-1<sub>NL4-3</sub> provirus (NIH  
743 HIV Reagent Program). The resulting pNL4-3.AD8 and pNL4-3.AE.2 IMCs express AD8  
744 and AE.2 Envs with N-terminal residues 1-33 (including the signal peptide) and C-  
745 terminal residues 751-856 (C-terminus of Env cytoplasmic tail) from the NL4-3 Env.

746

747 The pNL4-3.AD8 Bam and pNL4-3.AE.2 Bam IMC was created by introducing  
748 mutations encoding S752F and I756F changes in the Env cytoplasmic tail into pNL4-  
749 3.AD8 and pNL4-3.AE.2 using primers forward:

750 tccgtgcgattagtgatggatTcttgccactTtctgggacgatctgaggagcctgtgccttca, reverse:

751 tctgtctctgtctgtctccaccttcttctcgattccttcgggcctgtcgggtcccctcggggct. The pNL4-3.AD8(-)

752 IMC encodes an AD8 Env in which the REKR cleavage site (residues 508-511) is



753 altered to SEKS. The pNL4-3.AD8  $\Delta$ 712 plasmid encodes an AD8 Env with a truncated  
754 cytoplasmic tail (missing residues 712-856).

755

756 To knock out HIV-1 genes in the pNL4-3.AD8 plasmid, stop codons were  
757 introduced individually into the open reading frames encoding RT, RNase H, IN, Vif,  
758 Vpr, Vpu and Nef. The primers for these knockouts were: RT forward:  
759 TTTAAATTTTtaaATTAGTCCTATTGAGACTGTAC, reverse:  
760 GTGCAGCCAATCTGAGTC; RNase H forward: AAACCTTCTAaGTAGATGGGGC,  
761 reverse: CTGCTCCTATTATGGGTTC; IN forward:  
762 AAAGTACTATAaTTAGATGGAATAGATAAGGC, reverse: CCTGATTCCAGCACTGAC;  
763 Vif forward tgaggattaacacaTAGaaaagattagtaaaa, reverse  
764 tcctgtctacttgccacacaatcatcacctgc; Vpr forward:  
765 actgacagaggacagatggaaTAAGccccagaagaccaa, reverse:  
766 ttctaactagtagcaaagggtggctttatctgtt; Vpu forward:  
767 TAGcaacctataatagtagcaatagtagcattagtagtagca reverse:  
768 tacatgtactactactgctttgatagagaagcttgat Nef forward: TAAggtggcaagtggcaaaaagtagtga  
769 reverse: cttatagcaaaatcctttccaagccctgtctt .

770

771 IMCs encoding the Tri Bam and AD8 Bam 197 HT N Envs were made by  
772 introducing Q114E + Q567K + A682T or N197S + NM 625/626 HT + D674N changes,  
773 respectively, into pNL4-3.AD8 Bam IMC.

774

775 The pNL4-3.AE.1 Bam IMC was cloned from pNL4-3.AE.2 Bam by back reverting  
776 the following lysine residues: K658Q, K667A and K677N. The pNL4-3.E.1 Bam was

777 cloned by back reverting T582A in pNL4-3.AE.1 Bam. The Strep tag was inserted at the  
778 C terminus by site-directed mutagenesis using primers forward:  
779 CCCAGTTCGAGAAAaagatgggtggcaagtggtcaaaaagtagtgat, reverse:  
780 GGTGGCTCCAtagcaaaaatcctttccaagccctgtcttattcttctagta.

781

782 To create IMCs expressing soluble gp120s, the codon for gp120 residue 508 was  
783 replaced by a stop codon. All site-directed mutagenesis with IMCs was done using the  
784 Q5 high-fidelity DNA polymerase (New England Biolabs) and One Shot Stbl3  
785 Chemically Competent E. coli (Invitrogen) following the manufacturer's protocols.

786

787 To clone the pNL4-3.JR-FL IMC, an overlap extension PCR using PfuUltra II  
788 fusion HS DNA Polymerase (Agilent) was performed. The primers and template  
789 plasmids are as follows: AD8 Sal I forward (CAACAACCTGCTGTTTATCC) and  
790 AD8/JRFL Env reverse (ctgtagcactacagatcatc) using the pNL4-3.AD8 template;  
791 AD8/JRFL Env forward (gatgatctgtagtgctacag) and JRFL BamHI reverse  
792 (gtcccagataagtgccaag) using the pSVIIEnv JR-FL template (167). The resulting Sal I –  
793 BamHI *vpu*<sub>NL4-3</sub>-*env*<sub>JR-FL</sub> fragment was transferred to the pNL4-3.AD8 vector using Long  
794 Ligase.

795

796 To clone the pNL4-3.BG505 IMC, an overlap extension PCR was performed.  
797 The primers and template plasmids are as follows: pNL4-3.AD8 Sal I forward  
798 (CAACAACCTGCTGTTTATCCATTTTCAGAATTG) and BG505 vpu reverse  
799 (AATTTCAAAGGAAGCATtacatgtactactactg) using the pNL4-3.AD8 template; BG505  
800 vpu forward (cagtaagtagtacatgtaATGCTTCCTTTGGAAATT) and pcDNA BG505 BamHI

801 mut reverse (GCAAGAGCTAAGgATCCGCTCAC) using the pcDNA3.1 BG505 template  
802 (NIH HIV Reagent Program). The Sal I – BamHI *vpu*<sub>BG505</sub>-*env*<sub>BG505</sub> fragment was  
803 transferred to the pNL4-3.AD8 vector using Long Ligase.

804

805 Antibodies and sCD4. The following reagents were obtained through the NIH HIV  
806 Reagent Program, Division of AIDS, NIAID, NIH: VRC03, PGT121, 4E10, 10E8.v4, 39F,  
807 3074, 3869, 17b, E51 and sCD4.

808

809 Cell lines. HEK 293T, HeLa cells and TZM-bl cells (ATCC) were cultured in Dulbecco's  
810 modified Eagle's medium (DMEM) supplemented with 10% fetal bovine serum (FBS)  
811 and 100 µg/ml penicillin-streptomycin (Life Technologies). CCR5-expressing C8166-R5  
812 T cells were cultured in Roswell Park Memorial Institute (RPMI) 1640 medium  
813 supplemented with 10% FBS and 100 µg/ml penicillin-streptomycin; 1 µg/ml of  
814 puromycin was added every fifth passage.

815

816 Env expression and incorporation into virus particles. To prepare pseudoviruses, 293T  
817 cells were cotransfected using polyethyleneimine (PEI, Polysciences) with an Env-  
818 expressor plasmid, a Tat-encoding plasmid and the pNL4-3.ΔEnv plasmid (renamed  
819 from pNL4-3.Luc.R-E- plasmid, available at the NIH HIV Reagent Program) at a  
820 1:0.125:1 weight ratio unless indicated otherwise. To prepare replication-competent  
821 viruses, 293T cells were transfected with the pNL4-3.Env plasmid using PEI. The  
822 medium was replaced at 4-6 h after transfection. Lipofectamine 3000 (Invitrogen) was  
823 used to transfect HeLa cells following the manufacturer's protocol. At 48 h to 72 h after  
824 transfection, cells were lysed and clarified; supernatants were collected, filtered (0.45

825  $\mu\text{m}$ ) and pelleted at 14,000-100,000 x g for 1 h at 4°C. Virus pellets and clarified cell  
826 lysates were then analyzed by Western blotting using a nitrocellulose membrane and  
827 wet transfer (350 A, 75 min, Bio-Rad). Western blots were developed with 1:2,000 goat  
828 anti-gp120 polyclonal antibody (Invitrogen), 1:2,000 4E10 anti-gp41 antibody, 1:1,000  
829 mouse anti-p24 serum (John C. Kappes, University of Alabama at Birmingham),  
830 1:10,000 rabbit anti-hsp70 (K-20) antibody (Santa Cruz Biotechnology). The HRP-  
831 conjugated secondary antibodies were 1:2,000 rabbit anti-goat (Invitrogen), 1:2,000  
832 goat anti-human (Invitrogen), 1:1,000 goat anti-mouse (Invitrogen) and 1:10,000 goat  
833 anti-rabbit (Sigma-Aldrich). The intensity of protein bands on non-saturated Western  
834 blots was quantified using the Bio-Rad Image Lab program. Statistical significance was  
835 evaluated by a two-tailed Student's t test.

836

837 Virus infectivity. The cell supernatant containing virus was clarified by low-speed  
838 centrifugation (2,000 rpm for 10 min). To compare the infectivity of different viruses, an  
839 equal volume of clarified supernatant was incubated with TZM-bl cells in 96-well plates  
840 ( $2 \times 10^4$  cells per well). The plates were incubated at 37°C/5% CO<sub>2</sub> for 48 h, after which  
841 the cells were lysed and luciferase activity was measured using a luminometer.

842

843 Virus neutralization. Approximately 100 to 200 TCID<sub>50</sub> (50% tissue culture infectious  
844 dose) of virus was incubated with serial dilutions of purified antibodies, sCD4-Ig or  
845 BNM-III-170 at 37°C for 1 h. The mixture was then added to TZM-bl cells in 96-well  
846 plates and luciferase activity was measured after 48 h as described above. The  
847 concentrations of antibodies and other inhibitors that inhibit 50% of infection (the IC<sub>50</sub>

848 values) were determined using GraphPad Prism 8 (five-parameter dose-response) or  
849 Microsoft Excel graphs.

850

851 Deglycosylation of Env on virus particles. Purified virus particles were first lysed in 1X  
852 PBS/0.5% NP-40. The virus lysate was then denatured by boiling in denaturing buffer  
853 (New England BioLabs) for 10 min and treated with PNGase F or Endo Hf enzymes  
854 (New England BioLabs) for 1.5 h at 37°C in accordance with the manufacturer's  
855 protocol. The treated proteins were then analyzed by reducing SDS-PAGE and  
856 Western blotting.

857

858 Antigenicity of Env on virus particles. To assess Env antigenicity, 50-100- $\mu$ l aliquots of  
859 virus particles (purified and resuspended in 1X PBS) were incubated with a panel of  
860 antibodies at 10  $\mu$ g/mL concentration for 1 h at room temperature. One mL of chilled 1X  
861 PBS was added and samples were centrifuged at 14,000 x g for 1 h at 4°C. The pellets  
862 were lysed in 100  $\mu$ l chilled 1X PBS/0.5% NP-40/protease inhibitors cocktail. VLP  
863 lysates were rotated during incubation with Protein A-agarose beads for 1 h at 4°C and  
864 washed with chilled 1X PBS/0.1% NP-40 three times. The beads were resuspended in  
865 1X PBS containing NuPage LDS Sample Buffer (New England Biolabs) and  
866 dithiothreitol (DTT) and used for Western blotting. To prepare the Input (50%) sample,  
867 half of the virus volume was mixed with 1 mL chilled 1X PBS and centrifuged at 14,000  
868 x g for 1 h at 4°C; the pellet was resuspended in 1X PBS/LDS/DTT. To examine the  
869 effects of soluble CD4 or BMS-806 on Env conformation, 10  $\mu$ g/mL four-domain sCD4  
870 or 10  $\mu$ M BMS-806 was first added to virus particles before antibodies were added. To  
871 examine the antigenicity of crosslinked Env, a concentrated volume of virus particles

872 was first incubated with 0.1 mM or 1 mM DTSSP crosslinker for 30 min at room  
873 temperature, after which the reaction was quenched with 100 mM Tris-HCl, pH 8.0, for  
874 10 min at room temperature. More PBS was added and Env antigenicity was evaluated  
875 as described above.

876

877 Oligomerization of Env on virus particles. Purified virus particles were incubated with  
878 different concentrations of BS3 crosslinkers (ThermoFisher Scientific) for 30 min at  
879 room temperature, after which the reaction was quenched with 100 mM Tris-HCl, pH  
880 8.0, for 10 min at room temperature. LDS/DTT was added and samples were boiled  
881 and then analyzed by reducing SDS-PAGE and Western blotting.

882

883 Antigenicity of soluble gp120. 293T cells were transfected with IMCs expressing the  
884 soluble gp120 version of the AD8 Bam, Tri Bam, AE.1 Bam, NL4-3, JR-FL or BG505  
885 Envs using PEI. Forty-eight hours after transfection, cell supernatants containing the  
886 soluble glycoproteins were collected and filtered (0.45 µm). Aliquots were incubated  
887 with 10 µg/mL antibody and Protein A-agarose beads, and the mixture was rotated at  
888 room temperature for 2 h. The beads were washed three times with 1X PBS/0.1% NP-  
889 40 before the beads were boiled and Western blotted with a goat anti-gp120 antibody,  
890 as described above. To crosslink soluble gp120, the filtered supernatants from  
891 transfected 293T cells were incubated with 1 mM DTSSP for 30 min at room  
892 temperature. The reactions were quenched with 100 mM Tris-HCl, pH 8.0, for 10 min  
893 before the antigenicity assay was carried out as described above.

894

895 Shedding of virus particles. Purified virus particles were resuspended in 1X PBS,  
896 aliquoted into 50  $\mu$ L and incubated with serial dilutions of sCD4 or the CD4mc BNM-III-  
897 170 for 1 h at room temperature or the indicated temperatures. Next, 200  $\mu$ L 1X PBS  
898 was added and samples were centrifuged at 14,000 x g for 1 h at 4°C. Then 220  $\mu$ L of  
899 the supernatants was collected and rotated during incubation with Galanthus Nivalis  
900 Lectin (GNL)-agarose beads (Vector Laboratories) for 2 h at room temperature. Beads  
901 were washed three times with 1X PBS/0.1% NP-40 and processed for Western blotting  
902 with a goat anti-gp120 antibody, as described above. To evaluate spontaneous gp120  
903 shedding at different temperatures, aliquots of purified virus particles were incubated on  
904 ice or at different temperatures for the indicated amount of time before the samples  
905 were processed as described above. An aliquot of the purified virus particles prior to  
906 incubation with ligands or at different temperatures was used as the “Input” sample.  
907

908 Antigenicity of Env virions from infected T cells. 293T cells were transfected with IMCs  
909 expressing the Strep-tagged AD8 Bam or E.1 Bam Env using PEI. Seventy-two hours  
910 after transfection, the cell supernatants were clarified by low-speed centrifugation and  
911 serial dilutions of the virus were used to infect TZM-bl cells. Forty-eight hours later, the  
912 luciferase activity in the TZM-bl lysates was measured. Virus TCID<sub>50</sub> values were  
913 calculated using the Reed-Muench method (196,197). Approximately  $10^7$  C8166-R5  
914 cells at a density of  $1 \times 10^6$  cells/mL were infected with virus at a multiplicity of infection  
915 of 0.1 for 5 h or overnight, in the presence of 8  $\mu$ g/mL polybrene. The cells were then  
916 washed and fresh medium was added to dilute the cells to a density of  $2.5 \times 10^5$   
917 cells/mL. At three days after infection, one-quarter of the cells/medium was saved and

918 diluted 1:4 with fresh medium. Six to seven days after infection, virus particles were  
919 collected, purified and concentrated, and Env antigenicity was analyzed as described.

920

## 921 **ACKNOWLEDGMENTS**

922 We thank Ms. Elizabeth Carpelan for manuscript preparation. Antibodies against  
923 HIV-1 were kindly supplied by John C. Kappes (University of Alabama at Birmingham),  
924 Dennis Burton (Scripps), Peter Kwong and John Mascola (Vaccine Research Center  
925 NIH), Barton Haynes (Duke University), Hermann Katinger (Polymun), James Robinson  
926 (Tulane University), and Marshall Posner (Mount Sinai Medical Center). We thank the  
927 NIH HIV Reagent Program for providing additional reagents.

928 This work was supported by grants from the National Institutes of Health (grant  
929 nos. AI 145547, AI 124982, AI 150471, AI 129017 and AI 164562), a grant from Gilead  
930 Sciences, and by a gift from the late William F. McCarty-Cooper.

931 We declare no conflicts of interest.

932



933 **REFERENCES**

934

935 1. Wyatt R, Sodroski J. 1998. The HIV-1 envelope glycoproteins: fusogens,  
936 antigens, and immunogens. *Science* 280:1884-8.

937

938 2. Chen B. 2019. Molecular mechanism of HIV-1 entry. *Trends Microbiol* 27:878-  
939 891.

940

941 3. Willey RL, Bonifacino JS, Potts BJ, Martin MA, Klausner RD. 1988. Biosynthesis,  
942 cleavage, and degradation of the human immunodeficiency virus 1 envelope  
943 glycoprotein gp160. *Proc Natl Acad Sci U S A* 85:9580-4.

944

945 4. Earl PL, Moss B, Doms RW. 1991. Folding, interaction with GRP78-BiP,  
946 assembly, and transport of the human immunodeficiency virus type 1 envelope  
947 protein. *J Virol* 65:2047-55.

948

949 5. Pal R, Hoke GM, Sarngadharan MG. 1989. Role of oligosaccharides in the  
950 processing and maturation of envelope glycoproteins of human  
951 immunodeficiency virus type 1. *Proc Natl Acad Sci U S A* 86:3384-8.

952

953 6. Dewar RL, Vasudevachari MB, Natarajan V, Salzman NP. 1989. Biosynthesis  
954 and processing of human immunodeficiency virus type 1 envelope glycoproteins:  
955 effects of monensin on glycosylation and transport. *J Virol* 63:2452-6.

956

957 7. Zhang S, Nguyen HT, Ding H, Wang J, Zou S, Liu L, Guha D, Gabuzda D, Ho  
958 DD, Kappes JC, Sodroski J. 2021. Dual pathways of human immunodeficiency  
959 virus type 1 envelope glycoprotein trafficking modulate the selective exclusion of  
960 uncleaved oligomers from virions. *J Virol* 95:e01369-20.

961

962 8. Stein BS, Engleman EG. 1990. Intracellular processing of the gp160 HIV-1  
963 envelope precursor. Endoproteolytic cleavage occurs in a cis or medial  
964 compartment of the Golgi complex. *J Biol Chem* 265:2640-9.

965

966 9. Merkle RK, Helland DE, Welles JL, Shilatifard A, Haseltine WA, Cummings RD.  
967 1991. gp160 of HIV-I synthesized by persistently infected Molt-3 cells is  
968 terminally glycosylated: evidence that cleavage of gp160 occurs subsequent to  
969 oligosaccharide processing. *Arch Biochem Biophys* 290:248-57.

970

971 10. Doores KJ, Bonomelli C, Harvey DJ, Vasiljevic S, Dwek RA, Burton DR, Crispin  
972 M, Scanlan CN. 2010. Envelope glycans of immunodeficiency virions are almost  
973 entirely oligomannose antigens. *Proc Natl Acad Sci U S A* 107:13800-5.

974

975 11. Go EP, Ding H, Zhang S, Ringe RP, Nicely N, Hua D, Steinbock RT, Golabek M,  
976 Alin J, Alam SM, Cupo A, Haynes BF, Kappes JC, Moore JP, Sodroski JG,  
977 Desaire H. 2017. A glycosylation benchmark profile for HIV-1 envelope  
978 glycoprotein production based on eleven Env trimers. *J Virol* 91:e02428-16.

979

- 980  
981 12. Munro JB, Gorman J, Ma X, Zhou Z, Arthos J, Burton DR, Koff WC, Courter JR,  
982 Smith AB, 3rd, Kwong PD, Blanchard SC, Mothes W. 2014. Conformational  
983 dynamics of single HIV-1 envelope trimers on the surface of native virions.  
984 *Science* 346:759-63.  
985  
986 13. Wu L, Gerard NP, Wyatt R, Choe H, Parolin C, Ruffing N, Borsetti A, Cardoso  
987 AA, Desjardin E, Newman W, Gerard C, Sodroski J. 1996. CD4-induced  
988 interaction of primary HIV-1 gp120 glycoproteins with the chemokine receptor  
989 CCR-5. *Nature* 384:179-83.  
990  
991 14. Trkola A, Dragic T, Arthos J, Binley JM, Olson WC, Allaway GP, Cheng-Mayer C,  
992 Robinson J, Maddon PJ, Moore JP. 1996. CD4-dependent, antibody-sensitive  
993 interactions between HIV-1 and its co-receptor CCR-5. *Nature* 384:184-7.  
994  
995 15. Kuhmann SE, Platt EJ, Kozak SL, Kabat D. 2000. Cooperation of multiple CCR5  
996 coreceptors is required for infections by human immunodeficiency virus type 1. *J*  
997 *Virol* 74:7005-15.  
998  
999 16. Khasnis MD, Halkidis K, Bhardwaj A, Root MJ. 2016. Receptor activation of HIV-  
1000 1 Env leads to asymmetric exposure of the gp41 trimer. *PLoS Pathog*  
1001 12:e1006098.  
1002  
1003 17. Ma X, Lu M, Gorman J, Terry DS, Hong X, Zhou Z, Zhao H, Altman RB, Arthos J,  
1004 Blanchard SC, Kwong PD, Munro JB, Mothes W. 2018. HIV-1 Env trimer opens  
1005 through an asymmetric intermediate in which individual protomers adopt distinct  
1006 conformations. *Elife* 7:e34271.  
1007  
1008 18. Furuta RA, Wild CT, Weng Y, Weiss CD. 1998. Capture of an early fusion-active  
1009 conformation of HIV-1 gp41. *Nat Struct Biol* 5:276-9.  
1010  
1011 19. Koshiha T, Chan DC. 2003. The prefusogenic intermediate of HIV-1 gp41  
1012 contains exposed C-peptide regions. *J Biol Chem* 278:7573-9.  
1013  
1014 20. He Y, Vassell R, Zaitseva M, Nguyen N, Yang Z, Weng Y, Weiss CD. 2003.  
1015 Peptides trap the human immunodeficiency virus type 1 envelope glycoprotein  
1016 fusion intermediate at two sites. *J Virol* 77:1666-71.  
1017  
1018 21. Si Z, Madani N, Cox JM, Chruma JJ, Klein JC, Schon A, Phan N, Wang L, Biorn  
1019 AC, Cocklin S, Chaiken I, Freire E, Smith AB, 3rd, Sodroski JG. 2004. Small-  
1020 molecule inhibitors of HIV-1 entry block receptor-induced conformational  
1021 changes in the viral envelope glycoproteins. *Proc Natl Acad Sci U S A* 101:5036-  
1022 41.  
1023  
1024 22. Chan DC, Fass D, Berger JM, Kim PS. 1997. Core structure of gp41 from the  
1025 HIV envelope glycoprotein. *Cell* 89:263-73.  
1026

- 1027 23. Weissenhorn W, Dessen A, Harrison SC, Skehel JJ, Wiley DC. 1997. Atomic  
1028 structure of the ectodomain from HIV-1 gp41. *Nature* 387:426-30.  
1029
- 1030 24. Lu M, Blacklow SC, Kim PS. 1995. A trimeric structural domain of the HIV-1  
1031 transmembrane glycoprotein. *Nat Struct Biol* 2:1075-82.  
1032
- 1033 25. Melikyan GB, Markosyan RM, Hemmati H, Delmedico MK, Lambert DM, Cohen  
1034 FS. 2000. Evidence that the transition of HIV-1 gp41 into a six-helix bundle, not  
1035 the bundle configuration, induces membrane fusion. *J Cell Biol* 151:413-23.  
1036
- 1037 26. Wilen CB, Tilton JC, Doms RW. 2012. Molecular mechanisms of HIV entry. *Adv  
1038 Exp Med Biol* 726:223-42.  
1039
- 1040 27. Bonsignori M, Liao HX, Gao F, Williams WB, Alam SM, Montefiori DC, Haynes  
1041 BF. 2017. Antibody-virus co-evolution in HIV infection: paths for HIV vaccine  
1042 development. *Immunol Rev* 275:145-160.  
1043
- 1044 28. Kwong PD, Mascola JR. 2018. HIV-1 vaccines based on antibody identification,  
1045 B cell ontogeny, and epitope structure. *Immunity* 48:855-871.  
1046
- 1047 29. Sok D, Burton DR. 2018. Recent progress in broadly neutralizing antibodies to  
1048 HIV. *Nat Immunol* 19:1179-1188.  
1049
- 1050 30. Stewart-Jones GB, Soto C, Lemmin T, Chuang GY, Druz A, Kong R, Thomas  
1051 PV, Wagh K, Zhou T, Behrens AJ, Bylund T, Choi CW, Davison JR, Georgiev IS,  
1052 Joyce MG, Kwon YD, Pancera M, Taft J, Yang Y, Zhang B, Shivatare SS,  
1053 Shivatare VS, Lee CC, Wu CY, Bewley CA, Burton DR, Koff WC, Connors M,  
1054 Crispin M, Baxa U, Korber BT, Wong CH, Mascola JR, Kwong PD. 2016.  
1055 Trimeric HIV-1-Env structures define glycan shields from Clades A, B, and G.  
1056 *Cell* 165:813-26.  
1057
- 1058 31. Lee JH, Ozorowski G, Ward AB. 2016. Cryo-EM structure of a native, fully  
1059 glycosylated, cleaved HIV-1 envelope trimer. *Science* 351:1043-8.  
1060
- 1061 32. Ward AB, Wilson IA. 2017. The HIV-1 envelope glycoprotein structure: nailing  
1062 down a moving target. *Immunol Rev* 275:21-32.  
1063
- 1064 33. Wei X, Decker JM, Wang S, Hui H, Kappes JC, Wu X, Salazar-Gonzalez JF,  
1065 Salazar MG, Kilby JM, Saag MS, Komarova NL, Nowak MA, Hahn BH, Kwong  
1066 PD, Shaw GM. 2003. Antibody neutralization and escape by HIV-1. *Nature*  
1067 422:307-12.  
1068
- 1069 34. Decker JM, Bibollet-Ruche F, Wei X, Wang S, Levy DN, Wang W, Delaporte E,  
1070 Peeters M, Derdeyn CA, Allen S, Hunter E, Saag MS, Hoxie JA, Hahn BH,  
1071 Kwong PD, Robinson JE, Shaw GM. 2005. Antigenic conservation and  
1072 immunogenicity of the HIV coreceptor binding site. *J Exp Med* 201:1407-19.  
1073

- 1074 35. Alsaahafi N, Bakouche N, Kazemi M, Richard J, Ding S, Bhattacharyya S, Das D,  
1075 Anand SP, Prevost J, Tolbert WD, Lu H, Medjahed H, Gendron-Lepage G,  
1076 Ortega Delgado GG, Kirk S, Melillo B, Mothes W, Sodroski J, Smith AB, 3rd,  
1077 Kaufmann DE, Wu X, Pazgier M, Rouiller I, Finzi A, Munro JB. 2019. An  
1078 asymmetric opening of HIV-1 envelope mediates antibody-dependent cellular  
1079 cytotoxicity. *Cell Host Microbe* 25:578-587 e5.  
1080
- 1081 36. Labrijn AF, Poignard P, Raja A, Zwick MB, Delgado K, Franti M, Binley J, Vivona  
1082 V, Grundner C, Huang CC, Venturi M, Petropoulos CJ, Wrin T, Dimitrov DS,  
1083 Robinson J, Kwong PD, Wyatt RT, Sodroski J, Burton DR. 2003. Access of  
1084 antibody molecules to the conserved coreceptor binding site on glycoprotein  
1085 gp120 is sterically restricted on primary human immunodeficiency virus type 1. *J*  
1086 *Virol* 77:10557-65.  
1087
- 1088 37. Moore PL, Ranchobe N, Lambson BE, Gray ES, Cave E, Abrahams MR,  
1089 Bandawe G, Mlisana K, Abdool Karim SS, Williamson C, Morris L, Study C,  
1090 Immunology NCFHAV. 2009. Limited neutralizing antibody specificities drive  
1091 neutralization escape in early HIV-1 subtype C infection. *PLoS Pathog*  
1092 5:e1000598.  
1093
- 1094 38. Zou S, Zhang S, Gaffney A, Ding H, Lu M, Grover JR, Farrell M, Nguyen HT,  
1095 Zhao C, Anang S, Zhao M, Mohammadi M, Blanchard SC, Abrams C, Madani N,  
1096 Mothes W, Kappes JC, Smith AB, 3rd, Sodroski J. 2020. Long-acting BMS-  
1097 378806 analogues stabilize the State-1 conformation of the human  
1098 immunodeficiency virus type 1 envelope glycoproteins. *J Virol* 94:e00148-20.  
1099
- 1100 39. Zhang S, Wang K, Wang WL, Nguyen HT, Chen S, Lu M, Go EP, Ding H,  
1101 Steinbock RT, Desaire H, Kappes JC, Sodroski J, Mao Y. 2021. Asymmetric  
1102 structures and conformational plasticity of the uncleaved full-length human  
1103 immunodeficiency virus envelope glycoprotein trimer. *J Virol* 95:e0052921.  
1104
- 1105 40. Haim H, Salas I, Sodroski J. 2013. Proteolytic processing of the human  
1106 immunodeficiency virus envelope glycoprotein precursor decreases  
1107 conformational flexibility. *J Virol* 87:1884-9.  
1108
- 1109 41. Herrera C, Klasse PJ, Michael E, Kake S, Barnes K, Kibler CW, Campbell-  
1110 Gardener L, Si Z, Sodroski J, Moore JP, Beddows S. 2005. The impact of  
1111 envelope glycoprotein cleavage on the antigenicity, infectivity, and neutralization  
1112 sensitivity of Env-pseudotyped human immunodeficiency virus type 1 particles.  
1113 *Virology* 338:154-72.  
1114
- 1115 42. Pancera M, Wyatt R. 2005. Selective recognition of oligomeric HIV-1 primary  
1116 isolate envelope glycoproteins by potently neutralizing ligands requires efficient  
1117 precursor cleavage. *Virology* 332:145-56.  
1118
- 1119 43. Chakrabarti BK, Pancera M, Phogat S, O'Dell S, McKee K, Guenaga J, Robinson  
1120 J, Mascola J, Wyatt RT. 2011. HIV type 1 Env precursor cleavage state affects

- 1121 recognition by both neutralizing and nonneutralizing gp41 antibodies. *AIDS Res*  
1122 *Hum Retroviruses* 27:877-87.
- 1123
- 1124 44. Chakrabarti BK, Walker LM, Guenaga JF, Ghobbeh A, Pognard P, Burton DR,  
1125 Wyatt RT. 2011. Direct antibody access to the HIV-1 membrane-proximal  
1126 external region positively correlates with neutralization sensitivity. *J Virol*  
1127 85:8217-26.
- 1128
- 1129 45. Li Y, O'Dell S, Wilson R, Wu X, Schmidt SD, Hogerkorp CM, Louder MK, Longo  
1130 NS, Poulsen C, Guenaga J, Chakrabarti BK, Doria-Rose N, Roederer M,  
1131 Connors M, Mascola JR, Wyatt RT. 2012. HIV-1 neutralizing antibodies display  
1132 dual recognition of the primary and coreceptor binding sites and preferential  
1133 binding to fully cleaved envelope glycoproteins. *J Virol* 86:11231-41.
- 1134
- 1135 46. Guttman M, Cupo A, Julien JP, Sanders RW, Wilson IA, Moore JP, Lee KK.  
1136 2015. Antibody potency relates to the ability to recognize the closed, pre-fusion  
1137 form of HIV Env. *Nat Commun* 6:6144.
- 1138
- 1139 47. Kwong PD, Doyle ML, Casper DJ, Cicala C, Leavitt SA, Majeed S, Steenbeke  
1140 TD, Venturi M, Chaiken I, Fung M, Katinger H, Parren PW, Robinson J, Van Ryk  
1141 D, Wang L, Burton DR, Freire E, Wyatt R, Sodroski J, Hendrickson WA, Arthos J.  
1142 2002. HIV-1 evades antibody-mediated neutralization through conformational  
1143 masking of receptor-binding sites. *Nature* 420:678-82.
- 1144
- 1145 48. Wang Q, Finzi A, Sodroski J. 2020. The conformational states of the HIV-1  
1146 envelope glycoproteins. *Trends Microbiol* 28:655-667.
- 1147
- 1148 49. Haim H, Salas I, McGee K, Eichelberger N, Winter E, Pacheco B, Sodroski J.  
1149 2013. Modeling virus- and antibody-specific factors to predict human  
1150 immunodeficiency virus neutralization efficiency. *Cell Host Microbe* 14:547-58.
- 1151
- 1152 50. Wibmer CK, Bhiman JN, Gray ES, Tumba N, Abdool Karim SS, Williamson C,  
1153 Morris L, Moore PL. 2013. Viral escape from HIV-1 neutralizing antibodies drives  
1154 increased plasma neutralization breadth through sequential recognition of  
1155 multiple epitopes and immunotypes. *PLoS Pathog* 9:e1003738.
- 1156
- 1157 51. Gray ES, Taylor N, Wycuff D, Moore PL, Tomaras GD, Wibmer CK, Puren A,  
1158 DeCamp A, Gilbert PB, Wood B, Montefiori DC, Binley JM, Shaw GM, Haynes  
1159 BF, Mascola JR, Morris L. 2009. Antibody specificities associated with  
1160 neutralization breadth in plasma from human immunodeficiency virus type 1  
1161 subtype C-infected blood donors. *J Virol* 83:8925-37.
- 1162
- 1163 52. Sather DN, Armann J, Ching LK, Mavrantoni A, Sellhorn G, Caldwell Z, Yu X,  
1164 Wood B, Self S, Kalams S, Stamatatos L. 2009. Factors associated with the  
1165 development of cross-reactive neutralizing antibodies during human  
1166 immunodeficiency virus type 1 infection. *J Virol* 83:757-69.
- 1167

- 1168 53. Klein F, Diskin R, Scheid JF, Gaebler C, Mouquet H, Georgiev IS, Pancera M,  
1169 Zhou T, Incesu RB, Fu BZ, Gnanapragasam PN, Oliveira TY, Seaman MS,  
1170 Kwong PD, Bjorkman PJ, Nussenzweig MC. 2013. Somatic mutations of the  
1171 immunoglobulin framework are generally required for broad and potent HIV-1  
1172 neutralization. *Cell* 153:126-38.  
1173
- 1174 54. Walker LM, Simek MD, Priddy F, Gach JS, Wagner D, Zwick MB, Phogat SK,  
1175 Poignard P, Burton DR. 2010. A limited number of antibody specificities mediate  
1176 broad and potent serum neutralization in selected HIV-1 infected individuals.  
1177 *PLoS Pathog* 6:e1001028.  
1178
- 1179 55. Gray ES, Madiga MC, Hermanus T, Moore PL, Wibmer CK, Tumba NL, Werner  
1180 L, Mlisana K, Sibeko S, Williamson C, Abdool Karim SS, Morris L, Team CS.  
1181 2011. The neutralization breadth of HIV-1 develops incrementally over four years  
1182 and is associated with CD4+ T cell decline and high viral load during acute  
1183 infection. *J Virol* 85:4828-40.  
1184
- 1185 56. Corti D, Langedijk JP, Hinz A, Seaman MS, Vanzetta F, Fernandez-Rodriguez  
1186 BM, Silacci C, Pinna D, Jarrossay D, Balla-Jhagjhoorsingh S, Willems B, Zekveld  
1187 MJ, Dreja H, O'Sullivan E, Pade C, Orkin C, Jeffs SA, Montefiori DC, Davis D,  
1188 Weissenhorn W, McKnight A, Heeney JL, Sallusto F, Sattentau QJ, Weiss RA,  
1189 Lanzavecchia A. 2010. Analysis of memory B cell responses and isolation of  
1190 novel monoclonal antibodies with neutralizing breadth from HIV-1-infected  
1191 individuals. *PLoS One* 5:e8805.  
1192
- 1193 57. Wu X, Zhou T, Zhu J, Zhang B, Georgiev I, Wang C, Chen X, Longo NS, Louder  
1194 M, McKee K, O'Dell S, Perfetto S, Schmidt SD, Shi W, Wu L, Yang Y, Yang ZY,  
1195 Yang Z, Zhang Z, Bonsignori M, Crump JA, Kapiga SH, Sam NE, Haynes BF,  
1196 Simek M, Burton DR, Koff WC, Doria-Rose NA, Connors M, Program NCS,  
1197 Mullikin JC, Nabel GJ, Roederer M, Shapiro L, Kwong PD, Mascola JR. 2011.  
1198 Focused evolution of HIV-1 neutralizing antibodies revealed by structures and  
1199 deep sequencing. *Science* 333:1593-602.  
1200
- 1201 58. Hraber P, Seaman MS, Bailer RT, Mascola JR, Montefiori DC, Korber BT. 2014.  
1202 Prevalence of broadly neutralizing antibody responses during chronic HIV-1  
1203 infection. *AIDS* 28:163-9.  
1204
- 1205 59. Hessell AJ, Poignard P, Hunter M, Hangartner L, Tehrani DM, Bleeker WK,  
1206 Parren PW, Marx PA, Burton DR. 2009. Effective, low-titer antibody protection  
1207 against low-dose repeated mucosal SHIV challenge in macaques. *Nat Med*  
1208 15:951-4.  
1209
- 1210 60. Mascola JR, Lewis MG, Stiegler G, Harris D, VanCott TC, Hayes D, Louder MK,  
1211 Brown CR, Sapan CV, Frankel SS, Lu Y, Robb ML, Katinger H, Birx DL. 1999.  
1212 Protection of macaques against pathogenic simian/human immunodeficiency  
1213 virus 89.6PD by passive transfer of neutralizing antibodies. *J Virol* 73:4009-18.  
1214

- 1215 61. Mascola JR, Stiegler G, VanCott TC, Katinger H, Carpenter CB, Hanson CE,  
1216 Beary H, Hayes D, Frankel SS, Birx DL, Lewis MG. 2000. Protection of  
1217 macaques against vaginal transmission of a pathogenic HIV-1/SIV chimeric virus  
1218 by passive infusion of neutralizing antibodies. *Nat Med* 6:207-10.  
1219
- 1220 62. Moldt B, Rakasz EG, Schultz N, Chan-Hui PY, Swiderek K, Weisgrau KL,  
1221 Piaskowski SM, Bergman Z, Watkins DI, Poignard P, Burton DR. 2012. Highly  
1222 potent HIV-specific antibody neutralization in vitro translates into effective  
1223 protection against mucosal SHIV challenge in vivo. *Proc Natl Acad Sci U S A*  
1224 109:18921-5.  
1225
- 1226 63. Parren PW, Marx PA, Hessel AJ, Luckay A, Harouse J, Cheng-Mayer C, Moore  
1227 JP, Burton DR. 2001. Antibody protects macaques against vaginal challenge with  
1228 a pathogenic R5 simian/human immunodeficiency virus at serum levels giving  
1229 complete neutralization in vitro. *J Virol* 75:8340-7.  
1230
- 1231 64. Pauthner MG, Nkolola JP, Havenar-Daughton C, Murrell B, Reiss SM, Bastidas  
1232 R, Prevost J, Nedellec R, von Bredow B, Abbink P, Cottrell CA, Kulp DW,  
1233 Tokatlian T, Nogal B, Bianchi M, Li H, Lee JH, Butera ST, Evans DT, Hangartner  
1234 L, Finzi A, Wilson IA, Wyatt RT, Irvine DJ, Schief WR, Ward AB, Sanders RW,  
1235 Crotty S, Shaw GM, Barouch DH, Burton DR. 2019. Vaccine-induced protection  
1236 from homologous Tier 2 SHIV challenge in nonhuman primates depends on  
1237 serum-neutralizing antibody titers. *Immunity* 50:241-252 e6.  
1238
- 1239 65. Pauthner M, Havenar-Daughton C, Sok D, Nkolola JP, Bastidas R, Boopathy AV,  
1240 Carnathan DG, Chandrashekar A, Cirelli KM, Cottrell CA, Eroshkin AM, Guenaga  
1241 J, Kaushik K, Kulp DW, Liu J, McCoy LE, Oom AL, Ozorowski G, Post KW,  
1242 Sharma SK, Steichen JM, de Taeye SW, Tokatlian T, Torrents de la Pena A,  
1243 Butera ST, LaBranche CC, Montefiori DC, Silvestri G, Wilson IA, Irvine DJ,  
1244 Sanders RW, Schief WR, Ward AB, Wyatt RT, Barouch DH, Crotty S, Burton DR.  
1245 2017. Elicitation of robust Tier 2 neutralizing antibody responses in nonhuman  
1246 primates by HIV envelope trimer immunization using optimized approaches.  
1247 *Immunity* 46:1073-1088 e6.  
1248
- 1249 66. Torrents de la Pena A, de Taeye SW, Sliепен K, LaBranche CC, Burger JA,  
1250 Schermer EE, Montefiori DC, Moore JP, Klasse PJ, Sanders RW. 2018.  
1251 Immunogenicity in Rabbits of HIV-1 SOSIP Trimers from Clades A, B, and C,  
1252 given individually, sequentially, or in combination. *J Virol* 92:e01957-17.  
1253
- 1254 67. Klasse PJ, LaBranche CC, Ketas TJ, Ozorowski G, Cupo A, Pugach P, Ringe  
1255 RP, Golabek M, van Gils MJ, Guttman M, Lee KK, Wilson IA, Butera ST, Ward  
1256 AB, Montefiori DC, Sanders RW, Moore JP. 2016. Sequential and simultaneous  
1257 immunization of rabbits with HIV-1 envelope glycoprotein SOSIP.664 trimers  
1258 from Clades A, B and C. *PLoS Pathog* 12:e1005864.  
1259
- 1260 68. Hu JK, Crampton JC, Cupo A, Ketas T, van Gils MJ, Sliепен K, de Taeye SW,  
1261 Sok D, Ozorowski G, Deresa I, Stanfield R, Ward AB, Burton DR, Klasse PJ,

- 1262 Sanders RW, Moore JP, Crotty S. 2015. Murine antibody responses to cleaved  
1263 soluble HIV-1 envelope trimers are highly restricted in specificity. *J Virol*  
1264 89:10383-98.  
1265
- 1266 69. Feng Y, Tran K, Bale S, Kumar S, Guenaga J, Wilson R, de Val N, Arendt H,  
1267 DeStefano J, Ward AB, Wyatt RT. 2016. Thermostability of well-ordered HIV  
1268 spikes correlates with the elicitation of autologous Tier 2 neutralizing antibodies.  
1269 *PLoS Pathog* 12:e1005767.  
1270
- 1271 70. Dubrovskaya V, Tran K, Ozorowski G, Guenaga J, Wilson R, Bale S, Cottrell CA,  
1272 Turner HL, Seabright G, O'Dell S, Torres JL, Yang L, Feng Y, Leaman DP,  
1273 Vazquez Bernat N, Liban T, Louder M, McKee K, Bailer RT, Movsesyan A, Doria-  
1274 Rose NA, Pancera M, Karlsson Hedestam GB, Zwick MB, Crispin M, Mascola  
1275 JR, Ward AB, Wyatt RT. 2019. Vaccination with glycan-modified HIV NFL  
1276 envelope trimer-liposomes elicits broadly neutralizing antibodies to multiple sites  
1277 of vulnerability. *Immunity* 51:915-929 e7.  
1278
- 1279 71. Xu K, Acharya P, Kong R, Cheng C, Chuang GY, Liu K, Louder MK, O'Dell S,  
1280 Rawi R, Sastry M, Shen CH, Zhang B, Zhou T, Asokan M, Bailer RT, Chambers  
1281 M, Chen X, Choi CW, Dandey VP, Doria-Rose NA, Druz A, Eng ET, Farney SK,  
1282 Foulds KE, Geng H, Georgiev IS, Gorman J, Hill KR, Jafari AJ, Kwon YD, Lai YT,  
1283 Lemmin T, McKee K, Ohr TY, Ou L, Peng D, Rowshan AP, Sheng Z, Todd JP,  
1284 Tsybovsky Y, Viox EG, Wang Y, Wei H, Yang Y, Zhou AF, Chen R, Yang L,  
1285 Scorpio DG, McDermott AB, Shapiro L, et al. 2018. Epitope-based vaccine  
1286 design yields fusion peptide-directed antibodies that neutralize diverse strains of  
1287 HIV-1. *Nat Med* 24:857-867.  
1288
- 1289 72. Sanders RW, van Gils MJ, Derking R, Sok D, Ketas TJ, Burger JA, Ozorowski G,  
1290 Cupo A, Simonich C, Goo L, Arendt H, Kim HJ, Lee JH, Pugach P, Williams M,  
1291 Debnath G, Moldt B, van Breemen MJ, Isik G, Medina-Ramirez M, Back JW, Koff  
1292 WC, Julien JP, Rakasz EG, Seaman MS, Guttman M, Lee KK, Klasse PJ,  
1293 LaBranche C, Schief WR, Wilson IA, Overbaugh J, Burton DR, Ward AB,  
1294 Montefiori DC, Dean H, Moore JP. 2015. HIV-1 VACCINES. HIV-1 neutralizing  
1295 antibodies induced by native-like envelope trimers. *Science* 349:aac4223.  
1296
- 1297 73. de Taeye SW, Ozorowski G, Torrents de la Pena A, Guttman M, Julien JP, van  
1298 den Kerkhof TL, Burger JA, Pritchard LK, Pugach P, Yasmeen A, Crampton J,  
1299 Hu J, Bontjer I, Torres JL, Arendt H, DeStefano J, Koff WC, Schuitemaker H,  
1300 Eggink D, Berkhout B, Dean H, LaBranche C, Crotty S, Crispin M, Montefiori DC,  
1301 Klasse PJ, Lee KK, Moore JP, Wilson IA, Ward AB, Sanders RW. 2015.  
1302 Immunogenicity of stabilized HIV-1 envelope trimers with reduced exposure of  
1303 non-neutralizing epitopes. *Cell* 163:1702-15.  
1304
- 1305 74. Kong R, Duan H, Sheng Z, Xu K, Acharya P, Chen X, Cheng C, Dingens AS,  
1306 Gorman J, Sastry M, Shen CH, Zhang B, Zhou T, Chuang GY, Chao CW, Gu Y,  
1307 Jafari AJ, Louder MK, O'Dell S, Rowshan AP, Viox EG, Wang Y, Choi CW,  
1308 Corcoran MM, Corrigan AR, Dandey VP, Eng ET, Geng H, Foulds KE, Guo Y,



- 1309 Kwon YD, Lin B, Liu K, Mason RD, Nason MC, Ohr TY, Ou L, Rawi R, Sarfo EK,  
1310 Schon A, Todd JP, Wang S, Wei H, Wu W, Program NCS, Mullikin JC, Bailer RT,  
1311 Doria-Rose NA, Karlsson Hedestam GB, Scorpio DG, et al. 2019. Antibody  
1312 lineages with vaccine-induced antigen-binding hotspots develop broad HIV  
1313 neutralization. *Cell* 178:567-584 e19.  
1314
- 1315 75. Chuang GY, Lai YT, Boyington JC, Cheng C, Geng H, Narpala S, Rawi R,  
1316 Schmidt SD, Tsybovsky Y, Verardi R, Xu K, Yang Y, Zhang B, Chambers M,  
1317 Changela A, Corrigan AR, Kong R, Olia AS, Ou L, Sarfo EK, Wang S, Wu W,  
1318 Doria-Rose NA, McDermott AB, Mascola JR, Kwong PD. 2020. Development of  
1319 a 3Mut-apex-stabilized envelope trimer that expands HIV-1 neutralization breadth  
1320 when used to boost fusion peptide-directed vaccine-elicited responses. *J Virol*  
1321 94:e00074-20.  
1322
- 1323 76. Ringe RP, Pugach P, Cottrell CA, LaBranche CC, Seabright GE, Ketas TJ,  
1324 Ozorowski G, Kumar S, Schorcht A, van Gils MJ, Crispin M, Montefiori DC,  
1325 Wilson IA, Ward AB, Sanders RW, Klasse PJ, Moore JP. 2019. Closing and  
1326 opening holes in the glycan shield of HIV-1 envelope glycoprotein SOSIP trimers  
1327 can redirect the neutralizing antibody response to the newly unmasked epitopes.  
1328 *J Virol* 93:e01656-18.  
1329
- 1330 77. Charles TP, Burton SL, Arunachalam PS, Cottrell CA, Sewall LM, Bollimpelli VS,  
1331 Gangadhara S, Dey AK, Ward AB, Shaw GM, Hunter E, Amara RR, Pulendran  
1332 B, van Gils MJ, Derdeyn CA. 2021. The C3/465 glycan hole cluster in BG505  
1333 HIV-1 envelope is the major neutralizing target involved in preventing mucosal  
1334 SHIV infection. *PLoS Pathog* 17:e1009257.  
1335
- 1336 78. McCoy LE, van Gils MJ, Ozorowski G, Messmer T, Briney B, Voss JE, Kulp DW,  
1337 Macauley MS, Sok D, Pauthner M, Menis S, Cottrell CA, Torres JL, Hsueh J,  
1338 Schief WR, Wilson IA, Ward AB, Sanders RW, Burton DR. 2016. Holes in the  
1339 glycan shield of the native HIV envelope are a target of trimer-elicited neutralizing  
1340 antibodies. *Cell Rep* 16:2327-38.  
1341
- 1342 79. Nogal B, Bianchi M, Cottrell CA, Kirchdoerfer RN, Sewall LM, Turner HL, Zhao F,  
1343 Sok D, Burton DR, Hangartner L, Ward AB. 2020. Mapping polyclonal antibody  
1344 responses in non-human primates vaccinated with HIV Env trimer subunit  
1345 vaccines. *Cell Rep* 30:3755-3765 e7.  
1346
- 1347 80. Klasse PJ, Ketas TJ, Cottrell CA, Ozorowski G, Debnath G, Camara D,  
1348 Francomano E, Pugach P, Ringe RP, LaBranche CC, van Gils MJ, Bricault CA,  
1349 Barouch DH, Crotty S, Silvestri G, Kasturi S, Pulendran B, Wilson IA, Montefiori  
1350 DC, Sanders RW, Ward AB, Moore JP. 2018. Epitopes for neutralizing antibodies  
1351 induced by HIV-1 envelope glycoprotein BG505 SOSIP trimers in rabbits and  
1352 macaques. *PLoS Pathog* 14:e1006913.  
1353
- 1354 81. Aljedani SS, Liban TJ, Tran K, Phad G, Singh S, Dubrovskaya V, Pushparaj P,  
1355 Martinez-Murillo P, Rodarte J, Mileant A, Mangala Prasad V, Kinzelman R, O'Dell

- 1356 S, Mascola JR, Lee KK, Karlsson Hedestam GB, Wyatt RT, Pancera M. 2021.  
1357 Structurally related but genetically unrelated antibody lineages converge on an  
1358 immunodominant HIV-1 Env neutralizing determinant following trimer  
1359 immunization. *PLoS Pathog* 17:e1009543.  
1360
- 1361 82. Lei L, Yang YR, Tran K, Wang Y, Chiang CI, Ozorowski G, Xiao Y, Ward AB,  
1362 Wyatt RT, Li Y. 2019. The HIV-1 envelope glycoprotein C3/V4 region defines a  
1363 prevalent neutralization epitope following immunization. *Cell Rep* 27:586-598 e6.  
1364
- 1365 83. van Schooten J, van Haaren MM, Li H, McCoy LE, Havenar-Daughton C, Cottrell  
1366 CA, Burger JA, van der Woude P, Helgers LC, Tomris I, Labranche CC,  
1367 Montefiori DC, Ward AB, Burton DR, Moore JP, Sanders RW, Crotty S, Shaw  
1368 GM, van Gils MJ. 2021. Antibody responses induced by SHIV infection are more  
1369 focused than those induced by soluble native HIV-1 envelope trimers in non-  
1370 human primates. *PLoS Pathog* 17:e1009736.  
1371
- 1372 84. Antanasijevic A, Sewall LM, Cottrell CA, Carnathan DG, Jimenez LE, Ngo JT,  
1373 Silverman JB, Groschel B, Georgeson E, Bhiman J, Bastidas R, LaBranche C,  
1374 Allen JD, Copps J, Perrett HR, Rantalainen K, Cannac F, Yang YR, de la Pena  
1375 AT, Rocha RF, Berndsen ZT, Baker D, King NP, Sanders RW, Moore JP, Crotty  
1376 S, Crispin M, Montefiori DC, Burton DR, Schief WR, Silvestri G, Ward AB. 2021.  
1377 Polyclonal antibody responses to HIV Env immunogens resolved using cryoEM.  
1378 *Nat Commun* 12:4817.  
1379
- 1380 85. Sanders RW, Derking R, Cupo A, Julien JP, Yasmineen A, de Val N, Kim HJ,  
1381 Blattner C, de la Pena AT, Korzun J, Golabek M, de Los Reyes K, Ketas TJ, van  
1382 Gils MJ, King CR, Wilson IA, Ward AB, Klasse PJ, Moore JP. 2013. A next-  
1383 generation cleaved, soluble HIV-1 Env trimer, BG505 SOSIP.664 gp140,  
1384 expresses multiple epitopes for broadly neutralizing but not non-neutralizing  
1385 antibodies. *PLoS Pathog* 9:e1003618.  
1386
- 1387 86. Alsaahafi N, Debbeche O, Sodroski J, Finzi A. 2015. Effects of the I559P gp41  
1388 change on the conformation and function of the human immunodeficiency virus  
1389 (HIV-1) membrane envelope glycoprotein trimer. *PLoS One* 10:e0122111.  
1390
- 1391 87. Alsaahafi N, Anand SP, Castillo-Menendez L, Verly MM, Medjahed H, Prevost J,  
1392 Herschhorn A, Richard J, Schon A, Melillo B, Freire E, Smith AB, 3rd, Sodroski J,  
1393 Finzi A. 2018. SOSIP changes affect human immunodeficiency virus type 1  
1394 envelope glycoprotein conformation and CD4 engagement. *J Virol* 92.  
1395
- 1396 88. Castillo-Menendez LR, Nguyen HT, Sodroski J. 2019. Conformational differences  
1397 between functional human immunodeficiency virus envelope glycoprotein trimers  
1398 and stabilized soluble trimers. *J Virol* 93:e01709-18.  
1399
- 1400 89. Nguyen HT, Alsaahafi N, Finzi A, Sodroski JG. 2019. Effects of the SOS  
1401 (A501C/T605C) and DS (I201C/A433C) disulfide bonds on HIV-1 membrane  
1402 envelope glycoprotein conformation and function. *J Virol* 93:e00304-19.

- 1403  
1404 90. Go EP, Herschhorn A, Gu C, Castillo-Menendez L, Zhang S, Mao Y, Chen H,  
1405 Ding H, Wakefield JK, Hua D, Liao HX, Kappes JC, Sodroski J, Desaire H. 2015.  
1406 Comparative analysis of the glycosylation profiles of membrane-anchored HIV-1  
1407 envelope glycoprotein trimers and soluble gp140. *J Virol* 89:8245-57.  
1408
- 1409 91. Cao L, Pauthner M, Andrabi R, Rantalainen K, Berndsen Z, Diedrich JK, Menis  
1410 S, Sok D, Bastidas R, Park SR, Delahunty CM, He L, Guenaga J, Wyatt RT,  
1411 Schief WR, Ward AB, Yates JR, 3rd, Burton DR, Paulson JC. 2018. Differential  
1412 processing of HIV envelope glycans on the virus and soluble recombinant trimer.  
1413 *Nat Commun* 9:3693.  
1414
- 1415 92. Torrents de la Pena A, Rantalainen K, Cottrell CA, Allen JD, van Gils MJ, Torres  
1416 JL, Crispin M, Sanders RW, Ward AB. 2019. Similarities and differences between  
1417 native HIV-1 envelope glycoprotein trimers and stabilized soluble trimer  
1418 mimetics. *PLoS Pathog* 15:e1007920.  
1419
- 1420 93. Struwe WB, Chertova E, Allen JD, Seabright GE, Watanabe Y, Harvey DJ,  
1421 Medina-Ramirez M, Roser JD, Smith R, Westcott D, Keele BF, Bess JW, Jr.,  
1422 Sanders RW, Lifson JD, Moore JP, Crispin M. 2018. Site-specific glycosylation of  
1423 virion-derived HIV-1 Env is mimicked by a soluble trimeric immunogen. *Cell Rep*  
1424 24:1958-1966 e5.  
1425
- 1426 94. Castillo-Menendez LR, Witt K, Espy N, Princiotta A, Madani N, Pacheco B, Finzi  
1427 A, Sodroski J. 2018. Comparison of uncleaved and mature human  
1428 immunodeficiency virus membrane envelope glycoprotein trimers. *J Virol*  
1429 92:e00277-18.  
1430
- 1431 95. Lu M, Ma X, Castillo-Menendez LR, Gorman J, Alshafi N, Ermel U, Terry DS,  
1432 Chambers M, Peng D, Zhang B, Zhou T, Reichard N, Wang K, Grover JR,  
1433 Carman BP, Gardner MR, Nikic-Spiegel I, Sugawara A, Arthos J, Lemke EA,  
1434 Smith AB, 3rd, Farzan M, Abrams C, Munro JB, McDermott AB, Finzi A, Kwong  
1435 PD, Blanchard SC, Sodroski JG, Mothes W. 2019. Associating HIV-1 envelope  
1436 glycoprotein structures with states on the virus observed by smFRET. *Nature*  
1437 568:415-419.  
1438
- 1439 96. Mangala Prasad V, Leaman DP, Lovendahl KN, Croft JT, Benhaim MA, Hodge  
1440 EA, Zwick MB, Lee KK. 2022. Cryo-ET of Env on intact HIV virions reveals  
1441 structural variation and positioning on the Gag lattice. *Cell* 185:641-653 e17.  
1442
- 1443 97. McCoy LE, Burton DR. 2017. Identification and specificity of broadly neutralizing  
1444 antibodies against HIV. *Immunol Rev* 275:11-20.  
1445
- 1446 98. Haynes BF, Burton DR, Mascola JR. 2019. Multiple roles for HIV broadly  
1447 neutralizing antibodies. *Sci Transl Med* 11:eaaz2686.  
1448
- 1449 99. Haynes BF, Verkoczy L. 2014. AIDS/HIV. Host controls of HIV neutralizing

- 1450 antibodies. *Science* 344:588-9.
- 1451
- 1452 100. Haynes BF, Kelsoe G, Harrison SC, Kepler TB. 2012. B-cell-lineage immunogen  
1453 design in vaccine development with HIV-1 as a case study. *Nat Biotechnol*  
1454 30:423-33.
- 1455
- 1456 101. Seabright GE, Doores KJ, Burton DR, Crispin M. 2019. Protein and Glycan  
1457 Mimicry in HIV Vaccine Design. *J Mol Biol* 431:2223-2247.
- 1458
- 1459 102. Liu H, Su X, Si L, Lu L, Jiang S. 2018. The development of HIV vaccines  
1460 targeting gp41 membrane-proximal external region (MPER): challenges and  
1461 prospects. *Protein Cell* 9:596-615.
- 1462
- 1463 103. Ofek G, Tang M, Sambor A, Katinger H, Mascola JR, Wyatt R, Kwong PD. 2004.  
1464 Structure and mechanistic analysis of the anti-human immunodeficiency virus  
1465 type 1 antibody 2F5 in complex with its gp41 epitope. *J Virol* 78:10724-37.
- 1466
- 1467 104. Irimia A, Serra AM, Sarkar A, Jacak R, Kalyuzhnyi O, Sok D, Saye-Francisco KL,  
1468 Schiffner T, Tingle R, Kubitz M, Adachi Y, Stanfield RL, Deller MC, Burton DR,  
1469 Schief WR, Wilson IA. 2017. Lipid interactions and angle of approach to the HIV-  
1470 1 viral membrane of broadly neutralizing antibody 10E8: Insights for vaccine and  
1471 therapeutic design. *PLoS Pathog* 13:e1006212.
- 1472
- 1473 105. Rantalainen K, Berndsen ZT, Antanasijevic A, Schiffner T, Zhang X, Lee WH,  
1474 Torres JL, Zhang L, Irimia A, Copps J, Zhou KH, Kwon YD, Law WH, Schramm  
1475 CA, Verardi R, Krebs SJ, Kwong PD, Doria-Rose NA, Wilson IA, Zwick MB,  
1476 Yates JR, 3rd, Schief WR, Ward AB. 2020. HIV-1 envelope and MPER antibody  
1477 structures in lipid assemblies. *Cell Rep* 31:107583.
- 1478
- 1479 106. Huang J, Ofek G, Laub L, Louder MK, Doria-Rose NA, Longo NS, Imamichi H,  
1480 Bailer RT, Chakrabarti B, Sharma SK, Alam SM, Wang T, Yang Y, Zhang B,  
1481 Migueles SA, Wyatt R, Haynes BF, Kwong PD, Mascola JR, Connors M. 2012.  
1482 Broad and potent neutralization of HIV-1 by a gp41-specific human antibody.  
1483 *Nature* 491:406-12.
- 1484
- 1485 107. Haim H, Strack B, Kassa A, Madani N, Wang L, Courter JR, Princiotta A, McGee  
1486 K, Pacheco B, Seaman MS, Smith AB, 3rd, Sodroski J. 2011. Contribution of  
1487 intrinsic reactivity of the HIV-1 envelope glycoproteins to CD4-independent  
1488 infection and global inhibitor sensitivity. *PLoS Pathog* 7:e1002101.
- 1489
- 1490 108. Bradley T, Trama A, Tumba N, Gray E, Lu X, Madani N, Jahanbakhsh F, Eaton  
1491 A, Xia SM, Parks R, Lloyd KE, Sutherland LL, Scarce RM, Bowman CM,  
1492 Barnett S, Abdool-Karim SS, Boyd SD, Melillo B, Smith AB, 3rd, Sodroski J,  
1493 Kepler TB, Alam SM, Gao F, Bonsignori M, Liao HX, Moody MA, Montefiori D,  
1494 Santra S, Morris L, Haynes BF. 2016. Amino acid changes in the HIV-1 gp41  
1495 membrane proximal region control virus neutralization sensitivity. *EBioMedicine*  
1496 12:196-207.

- 1497  
1498 109. Ringe R, Bhattacharya J. 2012. Association of enhanced HIV-1 neutralization by  
1499 a single Y681H substitution in gp41 with increased gp120-CD4 interaction and  
1500 macrophage infectivity. *PLoS One* 7:e37157.  
1501
- 1502 110. Blish CA, Nguyen MA, Overbaugh J. 2008. Enhancing exposure of HIV-1  
1503 neutralization epitopes through mutations in gp41. *PLoS Med* 5:e9.  
1504
- 1505 111. Lovelace E, Xu H, Blish CA, Strong R, Overbaugh J. 2011. The role of amino  
1506 acid changes in the human immunodeficiency virus type 1 transmembrane  
1507 domain in antibody binding and neutralization. *Virology* 421:235-44.  
1508
- 1509 112. Salimi H, Johnson J, Flores MG, Zhang MS, O'Malley Y, Houtman JC, Schlievert  
1510 PM, Haim H. 2020. The lipid membrane of HIV-1 stabilizes the viral envelope  
1511 glycoproteins and modulates their sensitivity to antibody neutralization. *J Biol*  
1512 *Chem* 295:348-362.  
1513
- 1514 113. Wang Q, Esnault F, Zhao M, Chiu TJ, Smith AB, 3rd, Nguyen HT, Sodroski JG.  
1515 2022. Global increases in human immunodeficiency virus neutralization  
1516 sensitivity due to alterations in the membrane-proximal external region of the  
1517 envelope glycoprotein can be minimized by distant State 1-stabilizing changes. *J*  
1518 *Virol* 96:e0187821.  
1519
- 1520 114. Julien JP, Cupo A, Sok D, Stanfield RL, Lyumkis D, Deller MC, Klasse PJ, Burton  
1521 DR, Sanders RW, Moore JP, Ward AB, Wilson IA. 2013. Crystal structure of a  
1522 soluble cleaved HIV-1 envelope trimer. *Science* 342:1477-83.  
1523
- 1524 115. Lyumkis D, Julien JP, de Val N, Cupo A, Potter CS, Klasse PJ, Burton DR,  
1525 Sanders RW, Moore JP, Carragher B, Wilson IA, Ward AB. 2013. Cryo-EM  
1526 structure of a fully glycosylated soluble cleaved HIV-1 envelope trimer. *Science*  
1527 342:1484-90.  
1528
- 1529 116. Pancera M, Zhou T, Druz A, Georgiev IS, Soto C, Gorman J, Huang J, Acharya  
1530 P, Chuang GY, Ofek G, Stewart-Jones GB, Stuckey J, Bailer RT, Joyce MG,  
1531 Louder MK, Tumba N, Yang Y, Zhang B, Cohen MS, Haynes BF, Mascola JR,  
1532 Morris L, Munro JB, Blanchard SC, Mothes W, Connors M, Kwong PD. 2014.  
1533 Structure and immune recognition of trimeric pre-fusion HIV-1 Env. *Nature*  
1534 514:455-61.  
1535
- 1536 117. Bartesaghi A, Merk A, Borgnia MJ, Milne JL, Subramaniam S. 2013. Prefusion  
1537 structure of trimeric HIV-1 envelope glycoprotein determined by cryo-electron  
1538 microscopy. *Nat Struct Mol Biol* 20:1352-7.  
1539
- 1540 118. Lu M, Ma X, Reichard N, Terry DS, Arthos J, Smith AB, 3rd, Sodroski JG,  
1541 Blanchard SC, Mothes W. 2020. Shedding-resistant HIV-1 envelope  
1542 glycoproteins adopt downstream conformations that remain responsive to  
1543 conformation-preferring ligands. *J Virol* 94:e00597-20.

- 1544  
1545 119. Chertova E, Bess JW, Jr., Crise BJ, Sowder IR, Schaden TM, Hilburn JM, Hoxie  
1546 JA, Benveniste RE, Lifson JD, Henderson LE, Arthur LO. 2002. Envelope  
1547 glycoprotein incorporation, not shedding of surface envelope glycoprotein  
1548 (gp120/SU), is the primary determinant of SU content of purified human  
1549 immunodeficiency virus type 1 and simian immunodeficiency virus. *J Virol*  
1550 76:5315-25.  
1551  
1552 120. Zhu P, Chertova E, Bess J, Jr., Lifson JD, Arthur LO, Liu J, Taylor KA, Roux KH.  
1553 2003. Electron tomography analysis of envelope glycoprotein trimers on HIV and  
1554 simian immunodeficiency virus virions. *Proc Natl Acad Sci U S A* 100:15812-7.  
1555  
1556 121. Poignard P, Moulard M, Golez E, Vivona V, Franti M, Venturini S, Wang M,  
1557 Parren PW, Burton DR. 2003. Heterogeneity of envelope molecules expressed  
1558 on primary human immunodeficiency virus type 1 particles as probed by the  
1559 binding of neutralizing and nonneutralizing antibodies. *J Virol* 77:353-65.  
1560  
1561 122. Hammonds J, Chen X, Fouts T, DeVico A, Montefiori D, Spearman P. 2005.  
1562 Induction of neutralizing antibodies against human immunodeficiency virus type 1  
1563 primary isolates by Gag-Env pseudovirion immunization. *J Virol* 79:14804-14.  
1564  
1565 123. Wang BZ, Liu W, Kang SM, Alam M, Huang C, Ye L, Sun Y, Li Y, Kothe DL,  
1566 Pushko P, Dokland T, Haynes BF, Smith G, Hahn BH, Compans RW. 2007.  
1567 Incorporation of high levels of chimeric human immunodeficiency virus envelope  
1568 glycoproteins into virus-like particles. *J Virol* 81:10869-78.  
1569  
1570 124. Moore PL, Crooks ET, Porter L, Zhu P, Cayanan CS, Grise H, Corcoran P, Zwick  
1571 MB, Franti M, Morris L, Roux KH, Burton DR, Binley JM. 2006. Nature of  
1572 nonfunctional envelope proteins on the surface of human immunodeficiency virus  
1573 type 1. *J Virol* 80:2515-28.  
1574  
1575 125. Crooks ET, Moore PL, Franti M, Cayanan CS, Zhu P, Jiang P, de Vries RP,  
1576 Wiley C, Zharkikh I, Schulke N, Roux KH, Montefiori DC, Burton DR, Binley JM.  
1577 2007. A comparative immunogenicity study of HIV-1 virus-like particles bearing  
1578 various forms of envelope proteins, particles bearing no envelope and soluble  
1579 monomeric gp120. *Virology* 366:245-62.  
1580  
1581 126. Tong T, Crooks ET, Osawa K, Robinson JE, Barnes M, Apetrei C, Binley JM.  
1582 2014. Multi-parameter exploration of HIV-1 virus-like particles as neutralizing  
1583 antibody immunogens in guinea pigs, rabbits and macaques. *Virology* 456-  
1584 457:55-69.  
1585  
1586 127. Crooks ET, Tong T, Osawa K, Binley JM. 2011. Enzyme digests eliminate  
1587 nonfunctional Env from HIV-1 particle surfaces, leaving native Env trimers intact  
1588 and viral infectivity unaffected. *J Virol* 85:5825-39.  
1589  
1590 128. Tong T, Crooks ET, Osawa K, Binley JM. 2012. HIV-1 virus-like particles bearing

- 1591 pure env trimers expose neutralizing epitopes but occlude nonneutralizing  
1592 epitopes. *J Virol* 86:3574-87.
- 1593
- 1594 129. Tong T, Osawa K, Robinson JE, Crooks ET, Binley JM. 2013. Topological  
1595 analysis of HIV-1 glycoproteins expressed in situ on virus surfaces reveals tighter  
1596 packing but greater conformational flexibility than for soluble gp120. *J Virol*  
1597 87:9233-49.
- 1598
- 1599 130. Crooks ET, Tong T, Chakrabarti B, Narayan K, Georgiev IS, Menis S, Huang X,  
1600 Kulp D, Osawa K, Muranaka J, Stewart-Jones G, Destefano J, O'Dell S,  
1601 LaBranche C, Robinson JE, Montefiori DC, McKee K, Du SX, Doria-Rose N,  
1602 Kwong PD, Mascola JR, Zhu P, Schief WR, Wyatt RT, Whalen RG, Binley JM.  
1603 2015. Vaccine-elicited Tier 2 HIV-1 neutralizing antibodies bind to quaternary  
1604 epitopes involving glycan-deficient patches proximal to the CD4 binding site.  
1605 *PLoS Pathog* 11:e1004932.
- 1606
- 1607 131. Crooks ET, Osawa K, Tong T, Grimley SL, Dai YD, Whalen RG, Kulp DW, Menis  
1608 S, Schief WR, Binley JM. 2017. Effects of partially dismantling the CD4 binding  
1609 site glycan fence of HIV-1 Envelope glycoprotein trimers on neutralizing antibody  
1610 induction. *Virology* 505:193-209.
- 1611
- 1612 132. Gonelli CA, Khoury G, Center RJ, Purcell DFJ. 2019. HIV-1-based virus-like  
1613 particles that morphologically resemble mature, infectious HIV-1 virions. *Viruses*  
1614 11:507.
- 1615
- 1616 133. Gonelli CA, King HAD, Mackenzie C, Sonza S, Center RJ, Purcell DFJ. 2021.  
1617 Immunogenicity of HIV-1-based virus-like particles with increased incorporation  
1618 and stability of membrane-bound Env. *Vaccines (Basel)* 9:239.
- 1619
- 1620 134. Stano A, Leaman DP, Kim AS, Zhang L, Autin L, Ingale J, Gift SK, Truong J,  
1621 Wyatt RT, Olson AJ, Zwick MB. 2017. Dense array of spikes on HIV-1 virion  
1622 particles. *J Virol* 91:e00415-17.
- 1623
- 1624 135. Beltran-Pavez C, Bontjer I, Gonzalez N, Pernas M, Merino-Mansilla A, Olvera A,  
1625 Miro JM, Brander C, Alami J, Sanders RW, Sanchez-Merino V, Yuste E. 2022.  
1626 Potent induction of envelope-specific antibody responses by virus-like particle  
1627 immunogens based on HIV-1 envelopes from patients with early broadly  
1628 neutralizing responses. *J Virol* 96:e01343-21.
- 1629
- 1630 136. Provine NM, Puryear WB, Wu X, Overbaugh J, Haigwood NL. 2009. The  
1631 infectious molecular clone and pseudotyped virus models of human  
1632 immunodeficiency virus type 1 exhibit significant differences in virion composition  
1633 with only moderate differences in infectivity and inhibition sensitivity. *J Virol*  
1634 83:9002-7.
- 1635
- 1636 137. Hammonds J, Chen X, Ding L, Fouts T, De Vico A, zur Megede J, Barnett S,  
1637 Spearman P. 2003. Gp120 stability on HIV-1 virions and Gag-Env pseudovirions

- 1638 is enhanced by an uncleaved Gag core. *Virology* 314:636-49.  
1639
- 1640 138. McKeating JA, McKnight A, Moore JP. 1991. Differential loss of envelope  
1641 glycoprotein gp120 from virions of human immunodeficiency virus type 1 isolates:  
1642 effects on infectivity and neutralization. *J Virol* 65:852-60.  
1643
- 1644 139. Layne SP, Merges MJ, Dembo M, Spouge JL, Conley SR, Moore JP, Raina JL,  
1645 Renz H, Gelderblom HR, Nara PL. 1992. Factors underlying spontaneous  
1646 inactivation and susceptibility to neutralization of human immunodeficiency virus.  
1647 *Virology* 189:695-714.  
1648
- 1649 140. Sarafianos SG, Marchand B, Das K, Himmel DM, Parniak MA, Hughes SH,  
1650 Arnold E. 2009. Structure and function of HIV-1 reverse transcriptase: molecular  
1651 mechanisms of polymerization and inhibition. *J Mol Biol* 385:693-713.  
1652
- 1653 141. Rice P, Craigie R, Davies DR. 1996. Retroviral integrases and their cousins. *Curr*  
1654 *Opin Struct Biol* 6:76-83.  
1655
- 1656 142. Vandegraaff N, Engelman A. 2007. Molecular mechanisms of HIV integration and  
1657 therapeutic intervention. *Expert Rev Mol Med* 9:1-19.  
1658
- 1659 143. Waheed AA, Ablan SD, Roser JD, Sowder RC, Schaffner CP, Chertova E, Freed  
1660 EO. 2007. HIV-1 escape from the entry-inhibiting effects of a cholesterol-binding  
1661 compound via cleavage of gp41 by the viral protease. *Proc Natl Acad Sci U S A*  
1662 104:8467-71.  
1663
- 1664 144. Waheed AA, Ablan SD, Sowder RC, Roser JD, Schaffner CP, Chertova E, Freed  
1665 EO. 2010. Effect of mutations in the human immunodeficiency virus type 1  
1666 protease on cleavage of the gp41 cytoplasmic tail. *J Virol* 84:3121-6.  
1667
- 1668 145. Trkola A, Purtscher M, Muster T, Ballaun C, Buchacher A, Sullivan N, Srinivasan  
1669 K, Sodroski J, Moore JP, Katinger H. 1996. Human monoclonal antibody 2G12  
1670 defines a distinctive neutralization epitope on the gp120 glycoprotein of human  
1671 immunodeficiency virus type 1. *J Virol* 70:1100-8.  
1672
- 1673 146. Wu X, Yang ZY, Li Y, Hogerkorp CM, Schief WR, Seaman MS, Zhou T, Schmidt  
1674 SD, Wu L, Xu L, Longo NS, McKee K, O'Dell S, Louder MK, Wycuff DL, Feng Y,  
1675 Nason M, Doria-Rose N, Connors M, Kwong PD, Roederer M, Wyatt RT, Nabel  
1676 GJ, Mascola JR. 2010. Rational design of envelope identifies broadly neutralizing  
1677 human monoclonal antibodies to HIV-1. *Science* 329:856-61.  
1678
- 1679 147. Walker LM, Phogat SK, Chan-Hui PY, Wagner D, Phung P, Goss JL, Wrin T,  
1680 Simek MD, Fling S, Mitcham JL, Lehrman JK, Priddy FH, Olsen OA, Frey SM,  
1681 Hammond PW, Protocol GPI, Kaminsky S, Zamb T, Moyle M, Koff WC, Poignard  
1682 P, Burton DR. 2009. Broad and potent neutralizing antibodies from an African  
1683 donor reveal a new HIV-1 vaccine target. *Science* 326:285-9.  
1684



- 1685 148. Walker LM, Huber M, Doores KJ, Falkowska E, Pejchal R, Julien JP, Wang SK,  
1686 Ramos A, Chan-Hui PY, Moyle M, Mitcham JL, Hammond PW, Olsen OA, Phung  
1687 P, Fling S, Wong CH, Phogat S, Wrin T, Simek MD, Protocol GPI, Koff WC,  
1688 Wilson IA, Burton DR, Poignard P. 2011. Broad neutralization coverage of HIV by  
1689 multiple highly potent antibodies. *Nature* 477:466-70.  
1690
- 1691 149. Blattner C, Lee JH, Slieden K, Derking R, Falkowska E, de la Pena AT, Cupo A,  
1692 Julien JP, van Gils M, Lee PS, Peng W, Paulson JC, Poignard P, Burton DR,  
1693 Moore JP, Sanders RW, Wilson IA, Ward AB. 2014. Structural delineation of a  
1694 quaternary, cleavage-dependent epitope at the gp41-gp120 interface on intact  
1695 HIV-1 Env trimers. *Immunity* 40:669-80.  
1696
- 1697 150. Huang J, Kang BH, Pancera M, Lee JH, Tong T, Feng Y, Imamichi H, Georgiev  
1698 IS, Chuang GY, Druz A, Doria-Rose NA, Laub L, Slieden K, van Gils MJ, de la  
1699 Pena AT, Derking R, Klasse PJ, Migueles SA, Bailer RT, Alam M, Pugach P,  
1700 Haynes BF, Wyatt RT, Sanders RW, Binley JM, Ward AB, Mascola JR, Kwong  
1701 PD, Connors M. 2014. Broad and potent HIV-1 neutralization by a human  
1702 antibody that binds the gp41-gp120 interface. *Nature* 515:138-42.  
1703
- 1704 151. Boots LJ, McKenna PM, Arnold BA, Keller PM, Gorny MK, Zolla-Pazner S,  
1705 Robinson JE, Conley AJ. 1997. Anti-human immunodeficiency virus type 1  
1706 human monoclonal antibodies that bind discontinuous epitopes in the viral  
1707 glycoproteins can identify mimotopes from recombinant phage peptide display  
1708 libraries. *AIDS Res Hum Retroviruses* 13:1549-59.  
1709
- 1710 152. Gorny MK, Conley AJ, Karwowska S, Buchbinder A, Xu JY, Emini EA, Koenig S,  
1711 Zolla-Pazner S. 1992. Neutralization of diverse human immunodeficiency virus  
1712 type 1 variants by an anti-V3 human monoclonal antibody. *J Virol* 66:7538-42.  
1713
- 1714 153. Thali M, Moore JP, Furman C, Charles M, Ho DD, Robinson J, Sodroski J. 1993.  
1715 Characterization of conserved human immunodeficiency virus type 1 gp120  
1716 neutralization epitopes exposed upon gp120-CD4 binding. *J Virol* 67:3978-88.  
1717
- 1718 154. Xiang SH, Wang L, Abreu M, Huang CC, Kwong PD, Rosenberg E, Robinson JE,  
1719 Sodroski J. 2003. Epitope mapping and characterization of a novel CD4-induced  
1720 human monoclonal antibody capable of neutralizing primary HIV-1 strains.  
1721 *Virology* 315:124-34.  
1722
- 1723 155. Posner MR, Hideshima T, Cannon T, Mukherjee M, Mayer KH, Byrn RA. 1991.  
1724 An IgG human monoclonal antibody that reacts with HIV-1/GP120, inhibits virus  
1725 binding to cells, and neutralizes infection. *J Immunol* 146:4325-32.  
1726
- 1727 156. Thali M, Olshevsky U, Furman C, Gabuzda D, Posner M, Sodroski J. 1991.  
1728 Characterization of a discontinuous human immunodeficiency virus type 1 gp120  
1729 epitope recognized by a broadly reactive neutralizing human monoclonal  
1730 antibody. *J Virol* 65:6188-93.  
1731

- 1732 157. Madani N, Princiotta AM, Easterhoff D, Bradley T, Luo K, Williams WB, Liao HX,  
1733 Moody MA, Phad GE, Vazquez Bernat N, Melillo B, Santra S, Smith AB, 3rd,  
1734 Karlsson Hedestam GB, Haynes B, Sodroski J. 2016. Antibodies elicited by  
1735 multiple envelope glycoprotein immunogens in primates neutralize primary  
1736 human immunodeficiency viruses (HIV-1) sensitized by CD4-mimetic  
1737 compounds. *J Virol* 90:5031-5046.  
1738
- 1739 158. Cavacini LA, Emes CL, Wisnewski AV, Power J, Lewis G, Montefiori D, Posner  
1740 MR. 1998. Functional and molecular characterization of human monoclonal  
1741 antibody reactive with the immunodominant region of HIV type 1 glycoprotein 41.  
1742 *AIDS Res Hum Retroviruses* 14:1271-80.  
1743
- 1744 159. Rizzuto CD, Wyatt R, Hernandez-Ramos N, Sun Y, Kwong PD, Hendrickson WA,  
1745 Sodroski J. 1998. A conserved HIV gp120 glycoprotein structure involved in  
1746 chemokine receptor binding. *Science* 280:1949-53.  
1747
- 1748 160. Huang CC, Tang M, Zhang MY, Majeed S, Montabana E, Stanfield RL, Dimitrov  
1749 DS, Korber B, Sodroski J, Wilson IA, Wyatt R, Kwong PD. 2005. Structure of a  
1750 V3-containing HIV-1 gp120 core. *Science* 310:1025-8.  
1751
- 1752 161. Moore JP, McKeating JA, Weiss RA, Sattentau QJ. 1990. Dissociation of gp120  
1753 from HIV-1 virions induced by soluble CD4. *Science* 250:1139-42.  
1754
- 1755 162. Lin PF, Blair W, Wang T, Spicer T, Guo Q, Zhou N, Gong YF, Wang HG, Rose  
1756 R, Yamanaka G, Robinson B, Li CB, Fridell R, Deminie C, Demers G, Yang Z,  
1757 Zadjura L, Meanwell N, Colonno R. 2003. A small molecule HIV-1 inhibitor that  
1758 targets the HIV-1 envelope and inhibits CD4 receptor binding. *Proc Natl Acad Sci*  
1759 *U S A* 100:11013-8.  
1760
- 1761 163. Wang T, Zhang Z, Wallace OB, Deshpande M, Fang H, Yang Z, Zadjura LM,  
1762 Tweedie DL, Huang S, Zhao F, Ranadive S, Robinson BS, Gong YF, Ricarrdi K,  
1763 Spicer TP, Deminie C, Rose R, Wang HG, Blair WS, Shi PY, Lin PF, Colonno  
1764 RJ, Meanwell NA. 2003. Discovery of 4-benzoyl-1-[(4-methoxy-1H-pyrrolo[2,3-  
1765 b]pyridin-3-yl)oxoacetyl]-2- (R)-methylpiperazine (BMS-378806): a novel HIV-1  
1766 attachment inhibitor that interferes with CD4-gp120 interactions. *J Med Chem*  
1767 46:4236-9.  
1768
- 1769 164. Pancera M, Shahzad-UI-Hussan S, Doria-Rose NA, McLellan JS, Bailer RT, Dai  
1770 K, Loesgen S, Louder MK, Staupe RP, Yang Y, Zhang B, Parks R, Eudailey J,  
1771 Lloyd KE, Blinn J, Alam SM, Haynes BF, Amin MN, Wang LX, Burton DR, Koff  
1772 WC, Nabel GJ, Mascola JR, Bewley CA, Kwong PD. 2013. Structural basis for  
1773 diverse N-glycan recognition by HIV-1-neutralizing V1-V2-directed antibody  
1774 PG16. *Nat Struct Mol Biol* 20:804-13.  
1775
- 1776 165. Wlodawer A, Miller M, Jaskolski M, Sathyanarayana BK, Baldwin E, Weber IT,  
1777 Selk LM, Clawson L, Schneider J, Kent SB. 1989. Conserved folding in retroviral  
1778 proteases: crystal structure of a synthetic HIV-1 protease. *Science* 245:616-21.

- 1779  
1780 166. Melillo B, Liang S, Park J, Schon A, Courter JR, LaLonde JM, Wendler DJ,  
1781 Princiotta AM, Seaman MS, Freire E, Sodroski J, Madani N, Hendrickson WA,  
1782 Smith AB, 3rd. 2016. Small-molecule CD4-mimics: structure-based optimization  
1783 of HIV-1 entry inhibition. *ACS Med Chem Lett* 7:330-4.  
1784  
1785 167. Nguyen HT, Qualizza A, Anang S, Zhao M, Zou S, Zhou R, Wang Q, Zhang S,  
1786 Deshpande A, Ding H, Chiu TJ, Smith AB, 3rd, Kappes JC, Sodroski JG. 2022.  
1787 Functional and highly cross-linkable HIV-1 envelope glycoproteins enriched in a  
1788 pretriggered conformation. *J Virol* 96:e0166821.  
1789  
1790 168. Herschhorn A, Ma X, Gu C, Ventura JD, Castillo-Menendez L, Melillo B, Terry  
1791 DS, Smith AB, 3rd, Blanchard SC, Munro JB, Mothes W, Finzi A, Sodroski J.  
1792 2016. Release of gp120 restraints leads to an entry-competent intermediate state  
1793 of the HIV-1 envelope glycoproteins. *mBio* 7:e01598-16.  
1794  
1795 169. Herschhorn A, Gu C, Moraca F, Ma X, Farrell M, Smith AB, 3rd, Pancera M,  
1796 Kwong PD, Schon A, Freire E, Abrams C, Blanchard SC, Mothes W, Sodroski  
1797 JG. 2017. The beta20-beta21 of gp120 is a regulatory switch for HIV-1 Env  
1798 conformational transitions. *Nat Commun* 8:1049.  
1799  
1800 170. Gorny MK, Wang XH, Williams C, Volsky B, Revesz K, Witover B, Burda S,  
1801 Urbanski M, Nyambi P, Krachmarov C, Pinter A, Zolla-Pazner S, Nadas A. 2009.  
1802 Preferential use of the VH5-51 gene segment by the human immune response to  
1803 code for antibodies against the V3 domain of HIV-1. *Mol Immunol* 46:917-26.  
1804  
1805 171. Anang S, Richard J, Bourassa C, Goyette G, Chiu TJ, Chen HC, Smith AB, 3rd,  
1806 Madani N, Finzi A, Sodroski J. 2022. Characterization of human  
1807 immunodeficiency virus (HIV-1) envelope glycoprotein variants selected for  
1808 resistance to a CD4-mimetic compound. *J Virol* 96:e0063622.  
1809  
1810 172. Kassa A, Finzi A, Pancera M, Courter JR, Smith AB, 3rd, Sodroski J. 2009.  
1811 Identification of a human immunodeficiency virus type 1 envelope glycoprotein  
1812 variant resistant to cold inactivation. *J Virol* 83:4476-88.  
1813  
1814 173. Kassa A, Madani N, Schon A, Haim H, Finzi A, Xiang SH, Wang L, Princiotta A,  
1815 Pancera M, Courter J, Smith AB, 3rd, Freire E, Kwong PD, Sodroski J. 2009.  
1816 Transitions to and from the CD4-bound conformation are modulated by a single-  
1817 residue change in the human immunodeficiency virus type 1 gp120 inner domain.  
1818 *J Virol* 83:8364-78.  
1819  
1820 174. Krowicka H, Robinson JE, Clark R, Hager S, Broyles S, Pincus SH. 2008. Use of  
1821 tissue culture cell lines to evaluate HIV antiviral resistance. *AIDS Res Hum*  
1822 *Retroviruses* 24:957-67.  
1823  
1824 175. Hoxie JA. 1991. CD4 envelope interactions of HIV-1 and related human  
1825 retroviruses. *Adv Exp Med Biol* 300:159-66.

- 1826  
1827 176. Ding S, Gasser R, Gendron-Lepage G, Medjahed H, Tolbert WD, Sodroski J,  
1828 Pazgier M, Finzi A. 2019. CD4 incorporation into HIV-1 viral particles exposes  
1829 envelope epitopes recognized by CD4-induced antibodies. *J Virol* 93:e01403-19.  
1830  
1831 177. Liu J, Bartesaghi A, Borgnia MJ, Sapiro G, Subramaniam S. 2008. Molecular  
1832 architecture of native HIV-1 gp120 trimers. *Nature* 455:109-13.  
1833  
1834 178. Li Z, Li W, Lu M, Bess J, Jr., Chao CW, Gorman J, Terry DS, Zhang B, Zhou T,  
1835 Blanchard SC, Kwong PD, Lifson JD, Mothes W, Liu J. 2020. Subnanometer  
1836 structures of HIV-1 envelope trimers on aldrithiol-2-inactivated virus particles. *Nat*  
1837 *Struct Mol Biol* 27:726-734.  
1838  
1839 179. Mangala Prasad V, Leaman DP, Lovendahl KN, Croft JT, Benhaim MA, Hodge  
1840 EA, Zwick MB, Lee KK. 2022. Cryo-ET of Env on intact HIV virions reveals  
1841 structural variation and positioning on the Gag lattice. *Cell* 185:641-653 e17.  
1842  
1843 180. Agrawal N, Leaman DP, Rowcliffe E, Kinkead H, Nohria R, Akagi J, Bauer K, Du  
1844 SX, Whalen RG, Burton DR, Zwick MB. 2011. Functional stability of unliganded  
1845 envelope glycoprotein spikes among isolates of human immunodeficiency virus  
1846 type 1 (HIV-1). *PLoS One* 6:e21339.  
1847  
1848 181. Chen BK, Gandhi RT, Baltimore D. 1996. CD4 down-modulation during infection  
1849 of human T cells with human immunodeficiency virus type 1 involves  
1850 independent activities of vpu, env, and nef. *J Virol* 70:6044-53.  
1851  
1852 182. Levesque K, Zhao YS, Cohen EA. 2003. Vpu exerts a positive effect on HIV-1  
1853 infectivity by down-modulating CD4 receptor molecules at the surface of HIV-1-  
1854 producing cells. *J Biol Chem* 278:28346-53.  
1855  
1856 183. Lama J, Mangasarian A, Trono D. 1999. Cell-surface expression of CD4 reduces  
1857 HIV-1 infectivity by blocking Env incorporation in a Nef- and Vpu-inhibitable  
1858 manner. *Curr Biol* 9:622-31.  
1859  
1860 184. Levesque K, Finzi A, Binette J, Cohen EA. 2004. Role of CD4 receptor down-  
1861 regulation during HIV-1 infection. *Curr HIV Res* 2:51-9.  
1862  
1863 185. Veillette M, Richard J, Pazgier M, Lewis GK, Parsons MS, Finzi A. 2016. Role of  
1864 HIV-1 Envelope Glycoproteins Conformation and Accessory Proteins on ADCC  
1865 Responses. *Curr HIV Res* 14:9-23.  
1866  
1867 186. Gohain N, Tolbert WD, Orlandi C, Richard J, Ding S, Chen X, Bonsor DA,  
1868 Sundberg EJ, Lu W, Ray K, Finzi A, Lewis GK, Pazgier M. 2016. Molecular basis  
1869 for epitope recognition by non-neutralizing anti-gp41 antibody F240. *Sci Rep*  
1870 6:36685.  
1871  
1872 187. Haim H, Si Z, Madani N, Wang L, Courter J, Princiotta A, Kassa A, DeGrace M,

- 1873 McGee-Estrada K, Mefford M, Gabuzda D, Smith AB III, Sodroski J. 2009.  
1874 Soluble CD4 and CD4-mimetic compounds inhibit HIV-1 infection by induction of  
1875 a short-lived activated state. *PLoS Pathogens* 5:e1000360.  
1876
- 1877 188. Madani N, Princiotta AM, Zhao C, Jahanbakhshsefidi F, Mertens M, Herschhorn  
1878 A, Melillo B, Smith AB III, Sodroski J. 2017. Activation and inactivation of primary  
1879 human immunodeficiency virus envelope glycoprotein trimers by CD4-mimetic  
1880 compounds. *J Virol* 91:e01880-16.  
1881
- 1882 189. Privalov PL. 1990. Cold denaturation of proteins. *Crit Rev Biochem Mol Biol*  
1883 25:281-305.  
1884
- 1885 190. Tsai CJ, Maizel JV, Jr., Nussinov R. 2002. The hydrophobic effect: a new insight  
1886 from cold denaturation and a two-state water structure. *Crit Rev Biochem Mol*  
1887 *Biol* 37:55-69.  
1888
- 1889 191. Lopez CF, Darst RK, Rosky PJ. 2008. Mechanistic elements of protein cold  
1890 denaturation. *J Phys Chem B* 112:5961-7.  
1891
- 1892 192. Sanders RW, Vesanen M, Schuelke N, Master A, Schiffner L, Kalyanaraman R,  
1893 Paluch M, Berkhout B, Maddon PJ, Olson WC, Lu M, Moore JP. 2002.  
1894 Stabilization of the soluble, cleaved, trimeric form of the envelope glycoprotein  
1895 complex of human immunodeficiency virus type 1. *J Virol* 76:8875-89.  
1896
- 1897 193. Sanders RW, Schiffner L, Master A, Kajumo F, Guo Y, Dragic T, Moore JP,  
1898 Binley JM. 2000. Variable-loop-deleted variants of the human immunodeficiency  
1899 virus type 1 envelope glycoprotein can be stabilized by an intermolecular  
1900 disulfide bond between the gp120 and gp41 subunits. *J Virol* 74:5091-100.  
1901
- 1902 194. Schulke N, Vesanen MS, Sanders RW, Zhu P, Lu M, Anselma DJ, Villa AR,  
1903 Parren PW, Binley JM, Roux KH, Maddon PJ, Moore JP, Olson WC. 2002.  
1904 Oligomeric and conformational properties of a proteolytically mature, disulfide-  
1905 stabilized human immunodeficiency virus type 1 gp140 envelope glycoprotein. *J*  
1906 *Virol* 76:7760-76.  
1907
- 1908 195. Madani N, Princiotta AM, Schon A, LaLonde J, Feng Y, Freire E, Park J, Courter  
1909 JR, Jones DM, Robinson J, Liao H-X, Moody MA, Permar S, Haynes B, Smith  
1910 AB III, Wyatt R, Sodroski J. 2014. CD4-mimetic small molecules sensitize human  
1911 immunodeficiency virus (HIV-1) to vaccine-elicited antibodies. *J Virol* 88:6542-  
1912 6555.  
1913
- 1914 196. Reed LJ, Muench H. 1938. A simple method of estimating fifty percent endpoints.  
1915 *Am J Hyg* 27:493-97.  
1916
- 1917 197. Ozanne G. Estimation of endpoints in biological systems. 1984. *Comput Biol Med*  
1918 14:377-84.  
1919

1920 **FIGURE LEGENDS**

1921 **FIG 1** Comparison of virus pseudotypes and virions produced by an infectious  
1922 molecular clone (IMC). (A) 293T cells and HeLa cells were transfected with the  
1923 pSVIIIenv AD8 plasmid expressing the full-length HIV-1<sub>AD8</sub> Env alone (AD8) or together  
1924 with the pNL4-3.ΔEnv plasmid, or the pNL4-3.AD8 IMC alone (2 μg of each plasmid  
1925 was used, whether alone or in combination). When the pSVIIIenv AD8 expressor  
1926 plasmid was used, a plasmid expressing the HIV-1 Tat protein was also transfected at  
1927 an 8:1 Env:Tat weight ratio. Forty-eight to seventy-two hours later, the cell supernatants  
1928 were collected, filtered through a 0.45-μm membrane and centrifuged at 14,000 x g for 1  
1929 h at 4°C. In parallel, the cells were lysed. Precipitated particles and clarified cell lysates  
1930 were Western blotted with a goat anti-gp120 antibody, the 4E10 anti-gp41 antibody, the  
1931 rabbit anti-hsp70 antibody and the mouse anti-p24 serum. (B) 293T cells were  
1932 transfected with the pSVIIIenv AD8 plasmid expressing the full-length HIV-1<sub>AD8</sub> Env and  
1933 the pNL4-3.ΔEnv plasmid at indicated weight ratios, or the pNL4-3.AD8 IMC alone. Cell  
1934 lysates and virus particles were subsequently prepared and Western blotted as  
1935 described above. (C) 293T cells and HeLa cells were transfected with the IMCs  
1936 expressing the full-length AD8 Env, full-length Env with a defective cleavage site (-) or  
1937 a truncated Env $\Delta$ 712 lacking the cytoplasmic tail. Cell lysates and virus particles were  
1938 prepared and Western blotted as described above. The truncated form of gp41 in the  
1939  $\Delta$ 712 Env is indicated with an arrow. (D) 293T cells were transfected with the pNL4-  
1940 3.AD8 IMC that is unmodified or modified with stop codons in the genes encoding  
1941 reverse transcriptase (RT), RNase H, integrase (IN), Vif, Vpr, Vpu or Nef. The cell  
1942 lysates and virus particles were prepared and Western blotted as described above.  
1943 Equal volumes of the clarified cell supernatants were used to infect TZM-bl cells for 48

1944 hours, after which cells were lysed and the luciferase activity was measured. The  
1945 results are representative of those obtained in two independent experiments, with the  
1946 means and standard deviations reported. The full-length pNL4-3.AD8 IMC used in A-C  
1947 encodes an AD8 Env with Bam (S752F I756F) changes in the cytoplasmic tail (see Fig.  
1948 3 below).

1949

1950 **FIG 2** Characterization of the full-length AD8 Bam Env on IMC-produced virions. (A)  
1951 293T cells were transfected with the pNL4-3.AD8 IMC encoding an AD8 Env with Bam  
1952 (S752F I756F) changes in the cytoplasmic tail (see Fig. 3 below). Forty-eight to  
1953 seventy-two hours later, the cell supernatants were collected, filtered through a 0.45- $\mu$ m  
1954 membrane and centrifuged at 14,000-100,000 x g for 1 h at 4°C. Virus pellets were  
1955 lysed, denatured and treated with PNGase F or Endo Hf for 1.5 h at 37°C, and Western  
1956 blotted with a goat anti-gp120 antibody and the 4E10 anti-gp41 antibody. The  
1957 deglycosylated (dg) Envs produced by PNGase F and Endo Hf are indicated by red and  
1958 green labels, respectively. (B) Purified virus particles with AD8 Bam Envs were  
1959 incubated with the BS3 crosslinker at the indicated concentrations for 30 min at room  
1960 temperature. The samples were subsequently quenched, analyzed by reducing SDS-  
1961 PAGE and Western blotted with a goat anti-gp120 antibody. (C) Purified virus particles  
1962 were incubated with a panel of broadly neutralizing antibodies (bNAbs), poorly  
1963 neutralizing antibodies (pNAbs) and the anti-HR1 C34-Ig peptide for 1 h at room  
1964 temperature in the presence or absence of 10  $\mu$ g/mL four-domain soluble CD4 (sCD4).  
1965 The virus-antibody mixture was diluted twenty-fold with 1X PBS and centrifuged. The  
1966 virus-antibody pellet was lysed and precipitated with Protein A-agarose beads for 1 h at

1967 4°C. The beads were washed three times and Western blotted with a goat anti-gp120  
1968 antibody and the 4E10 anti-gp41 antibody. (D) Purified virus particles were incubated  
1969 with 10 µM BMS-806 or with the indicated concentration of DTSSP crosslinker for 30  
1970 min at room temperature before the reactions were quenched with 100 mM Tris-HCl, pH  
1971 8.0. Env antigenicity on these virus particles was studied as described in (C). (E) 293T  
1972 cells were transfected with the pNL4-3.AD8 Bam IMC expressing a soluble version of  
1973 gp120. Forty-eight hours later, 0.45-µm filtered supernatant containing the soluble  
1974 gp120 was crosslinked with 1 mM DTSSP as described above. Aliquots were then  
1975 incubated with a panel of pNAbs and Protein A-agarose beads for 2 h at room  
1976 temperature before the beads were washed and Western blotted with a goat anti-gp120  
1977 antibody. The results shown are representative of those obtained in two independent  
1978 experiments. The means and standard deviations of the results in C and D are reported  
1979 in the bar graphs in the panels on the right. The significance of the difference in  
1980 antibody binding between treated and untreated samples was evaluated by a Student's  
1981 t test; \*,  $p < 0.05$ ; \*\*,  $p < 0.01$ .

1982

1983 **FIG 3** Effects of cytoplasmic tail clipping on Env conformation. (A) 293T cells were  
1984 transfected with the pNL4-3.AD8 or pNL4-3.AD8 Bam IMCs, the latter encoding the  
1985 AD8 Env with Bam (S752F I756F) changes in the cytoplasmic tail. Forty-eight to  
1986 seventy-two hours later, the cell lysates and virus particles were prepared and Western  
1987 blotted as described in the Fig. 1A legend. Clipping of the gp41 subunit in the virus  
1988 particles was reduced by the Bam changes. (B) Seventy-two hours after transfection of  
1989 293T cells with IMCs, the cell supernatants were collected, clarified with a soft spin and  
1990 incubated for 1 h at 37°C with a panel of bNAbs and pNAbs, soluble CD4-Ig or the CD4-



1991 mimetic compound BNM-III-170. The mixture was added to TZM-bl cells for 48 h, after  
1992 which cells were lysed and the luciferase activity measured. The 50% inhibitory  
1993 concentrations of the Env ligands are reported in  $\mu\text{g}/\text{mL}$  except for BNM-III-170 (in  $\mu\text{M}$ ).  
1994 (C) Antigenicity of the VLP AD8 Env with and without the Bam changes was analyzed  
1995 as described in the Fig. 2C legend. The results are representative of those obtained in  
1996 two independent experiments. The means and standard deviations of the results in B  
1997 and C are reported in the bar graphs. The significance of the difference in antibody  
1998 binding to the AD8 and AD8 Bam Envs in C was evaluated by a Student's t test; \*,  $p <$   
1999 0.05.

2000

2001 **FIG 4** Effects of State-1-stabilizing and -destabilizing changes on virion Env. (A)  
2002 Neutralization of the AD8 Bam and AD8 Bam 197 HT N viruses by the indicated Env  
2003 ligands was measured as described in the Fig. 3B legend. The 50% inhibitory  
2004 concentrations of the Env ligands are reported in  $\mu\text{g}/\text{mL}$  except for BNM-III-170 (in  $\mu\text{M}$ ).  
2005 (B) 293T cells were transfected with pNL4-3.env IMCs expressing the AD8 Bam Env,  
2006 the State-1-destabilized AD8 Bam 197 HT N Env and the State-1-stabilized Envs Tri  
2007 Bam and AE.1 Bam. Seventy-two hours later, virions were purified and the antigenicity  
2008 of Env on virus particles was analyzed as described in the Fig. 2C legend. (C) 293T  
2009 cells were transfected with the pNL4-3.env IMCs expressing soluble versions of gp120  
2010 (sgp120) from the indicated Envs. Forty-eight hours later, the cell supernatant  
2011 containing secreted gp120 was collected, filtered through a  $0.45 \mu\text{m}$  membrane and  
2012 incubated with the indicated antibodies and Protein A-agarose beads for 2 h at room  
2013 temperature. The beads were washed and Western blotted with a goat anti-gp120  
2014 antibody. (D) Purified virus particles were incubated with the crosslinker BS3 at the

2015 indicated concentrations for 30 minutes at room temperature, after which the reactions  
2016 were quenched and samples were analyzed by reducing SDS-PAGE and Western  
2017 blotted with a goat anti-gp120 antibody. The results are representative of those obtained  
2018 in two independent experiments. The means and standard deviations of the results in A  
2019 and B are shown in the bar graphs. The significance of the difference in antibody  
2020 binding between Env mutants and AD8 Bam Env was evaluated by a Student's t test; \*,  
2021  $p < 0.05$ ; \*\*,  $p < 0.01$ ; \*\*\*,  $p < 0.001$ .

2022

2023 **FIG 5** Shedding of gp120 from Env on virus particles. (A) 293T cells were transfected  
2024 with the pNL4-3.AD8 Bam plasmid. Forty-eight to seventy-two hours later, the cell  
2025 supernatants were collected, filtered through a 0.45- $\mu$ m membrane and centrifuged at  
2026 100,000 x g for 1 h at 4°C. Virus pellets were resuspended and incubated with four-  
2027 domain soluble CD4 (sCD4) or the CD4-mimetic compound BNM-III-170 at the  
2028 indicated concentrations and temperatures for 1 h. Virus particles were again pelleted  
2029 and the supernatants containing shed gp120 were incubated with GNL beads for 2 h at  
2030 room temperature. Beads were washed and Western blotted with a goat anti-gp120  
2031 antibody. The percentage of the gp120 Env on the input virus that was detected in the  
2032 supernatants is plotted in the graphs on the right. (B) Shedding of gp120 from different  
2033 Envs after a 1-h room temperature incubation with the indicated concentrations of BNM-  
2034 III-170 was analyzed as described in A. (C) Purified virus particles were incubated at  
2035 different temperatures for different lengths of time. Shed gp120 was then analyzed as  
2036 described in A. (D) Purified virus particles with the AD8 Bam Env were incubated on ice  
2037 in the presence of DMSO or 10  $\mu$ M BMS-806 for different lengths of time. Shed gp120  
2038 was then analyzed as described in A. (E) Purified virus particles containing different

2039 AD8 Env variants were incubated on ice for the indicated lengths of time and shed  
2040 gp120 was then analyzed as described in A. Except for A, the results shown are  
2041 representative of those obtained in two independent experiments. In B-D, the means  
2042 and standard deviations are reported. The significance of the difference between  
2043 DMSO- and BMS-806-treated samples (C) or between Tri Bam and AE.1 Bam Envs  
2044 compared to AD8 Bam Env (D) was evaluated by a Student's t test; \*,  $p < 0.05$ ; \*\*,  $p <$   
2045  $0.01$ ; \*\*\*,  $p < 0.001$ .

2046

2047 **FIG 6** Maintenance of Tri Bam Env antigenicity on virions after prolonged incubation on  
2048 ice. HEK 293T cells were transfected with the pNL4-3.Tri Bam infectious molecular  
2049 clone. Seventy-two hours later, virus particles were purified, aliquoted and stored at  
2050  $-80^{\circ}\text{C}$ . Pilot experiments found no detectable difference in the Env content or  
2051 antigenicity of VLPs that were analyzed directly after production or were frozen at  $-80^{\circ}\text{C}$   
2052 once. One  $-80^{\circ}\text{C}$  aliquot was thawed and incubated on ice for 7 days (+Ice). At this  
2053 time, a second aliquot was thawed to serve as a reference control (-Ice). Both samples  
2054 were pelleted and washed to remove any shed gp120, after which the Env antigenicity  
2055 on virus particles was analyzed as described in the Fig. 2C legend. The results are  
2056 representative of those obtained in two independent experiments, with the means and  
2057 standard deviations reported in the bar graphs on the right.

2058

2059 **FIG 7** Characterization of VLP Envs from other HIV-1 strains. (A) 293T cells were  
2060 transfected with pNL4-3.env infectious molecular clones expressing the NL4-3, JR-FL  
2061 E168K and BG505 Envs. Seventy-two hours later, virus particles were purified and Env  
2062 antigenicity on virus particles was analyzed as described in the Fig. 2C legend. Note

2063 that in A only, the JR-FL E168K mutant was used to allow recognition by V2 quaternary  
2064 bNAbs (PG16, PGT145) (147,148). The means and standard deviations of the results  
2065 obtained in two independent experiments are reported in the bar graph at the right of  
2066 the figure. The significance of the difference between AD8 Bam Env and other Envs  
2067 was evaluated by a Student's t test; \*,  $p < 0.05$ ; \*\*,  $p < 0.01$ ; NA, not applicable. (B) The  
2068 antigenicity of soluble gp120 versions of the indicated Envs was performed as  
2069 described in the Fig. 4C legend. (C) The susceptibility of VLP Envs to gp120 shedding  
2070 induced by BNM-III-170 or ice incubation was evaluated as described in the Fig. 5B and  
2071 5E legend. (D) Env glycoprotein expression, processing and incorporation into virus  
2072 particles were examined as described in the Fig. 1A legend. The results are  
2073 representative of those obtained in at least two independent experiments.

2074

2075 **FIG 8** Characterization of Envs on virus particles from infected T cells. (A) HEK 293T  
2076 cells were transfected with pNL4-3.env infectious molecular clones expressing the  
2077 Strep-tagged AD8 Bam or E.1 Bam Envs. Addition of the Strep tag to the Env C  
2078 terminus does not affect neutralization sensitivity nor Env antigenicity on virus particles  
2079 (data not shown). Seventy-two hours later, the cell supernatants were clarified and  $ID_{50}$   
2080 values were determined using TZM-bl target cells. C8166-R5 cells were then infected  
2081 with virus particles at a multiplicity of infection of 0.1. Cells were washed 5-16 h after  
2082 infection and resuspended in fresh medium. Fresh medium was supplemented at three  
2083 days after infection. Six to seven days after infection, virus particles were collected,  
2084 purified and Env antigenicity was analyzed as described in the Fig. 2C legend. (B)  
2085 293T cells were transfected with the pNL4-3.E.1 Bam Strep infectious molecular clone  
2086 with or without a CD4-expressing plasmid at a 1:0.1 weight ratio. Seventy-two hours

2087 later, virus particles were collected, purified and Env antigenicity was analyzed as  
2088 described in the Fig. 2C legend. The results are representative of those obtained in at  
2089 least two independent experiments. The means and standard deviations of the results  
2090 from A and B are reported in the bar graphs (right panels). The significance of the  
2091 difference between the wild-type AD8 Bam Env and E.1 Bam Env (A) or between VLP  
2092 Envs made in the absence or presence of CD4 (B) was evaluated by a Student's t test;  
2093 \*,  $p < 0.05$ ; \*\*\*,  $p < 0.001$ .

2094

2095 **FIG 9** Model of Env conformations on virus particles. (A) Three populations of cleaved  
2096 Env trimers on virus particles are depicted along with their distinguishing properties.  
2097 Uncleaved (gp160) Env trimers, which are found to various extents on VLP  
2098 preparations, are shown on the right. (B) The relative levels of cleaved Env trimer  
2099 populations on virions are depicted for HIV-1 Envs with different levels of triggerability.  
2100 The approximate relationship of the different HIV-1 Env variants used in this study is  
2101 shown. Env triggerability is inversely related to the activation barrier separating State 1  
2102 from States 2/3 and varies among Envs from different primary HIV-1 strains (107). Envs  
2103 with intermediate levels of triggerability, like the AD8 Bam Env, populate the  
2104 pretriggered (State-1) conformation and also spontaneously sample more open,  
2105 downstream (States 2/3) conformations. Viral Envs with lower triggerability (e.g., the Tri  
2106 Bam or E.1 Bam Envs) populate the pretriggered (State-1) conformation on the virions  
2107 to a greater extent. Conversely, viral Envs with higher triggerability (e.g., the AD8 Bam  
2108 197 HT N Env) exhibit more open trimer conformations on the virions and are more  
2109 prone to shed gp120, leading to gp41-only trimers. (C) Modulation of virion Env  
2110 conformational transitions. Upon binding to membrane CD4 on a target cell, the

2111 pretriggered (State-1) Env conformation undergoes transitions to more open (State-2/3)  
2112 intermediates in which the gp120 coreceptor-binding site is exposed. Env binding to the  
2113 CCR5 or CXCR4 coreceptor promotes additional conformational changes in Env that  
2114 facilitate virus entry (green arrows). Depending on its triggerability, HIV-1 Env will  
2115 spontaneously sample more open (State-2/3) conformations (curved black arrow) in  
2116 which epitopes for some pNAbs become exposed. Such spontaneous transitions from  
2117 State 1 can be suppressed by State-1-stabilizing Env changes or by treatment of the  
2118 Env trimers with BMS-806 or chemical crosslinkers (red minus sign). Conversely, State-  
2119 1-destabilizing Env changes or treatment with sCD4 or CD4-mimetic compounds  
2120 (CD4mcs) drive Env trimers out of State 1 and increase the level of virion Envs in more  
2121 open conformations (green plus sign). When in close proximity to a potential target cell  
2122 expressing CCR5 or CXCR4 coreceptors, virions with Envs in these open (State-2/3)  
2123 conformations can infect the cell (168,169,171,187,188). However, compared with Envs  
2124 that engage CD4 on a target membrane, Envs opened by other means are more prone  
2125 to either spontaneous inactivation or neutralization by pNAbs (36,49,187,188,195). The  
2126 pNAb-reactive, open Env intermediates exhibit weak intersubunit interactions compared  
2127 to the bNAb-reactive State-1 Env trimers. Certain HIV-1 isolates like HIV-1<sub>AD8</sub> are not  
2128 neutralized by pNAbs yet show pNAb binding to cleaved Env on virus particles; this  
2129 apparent paradox can be resolved if the cleaved Env recognized by pNAbs is partially  
2130 or completely dysfunctional. Our results suggest that gp120 shedding is more likely to  
2131 occur from more open Env conformers (red arrow).

# Fig 1

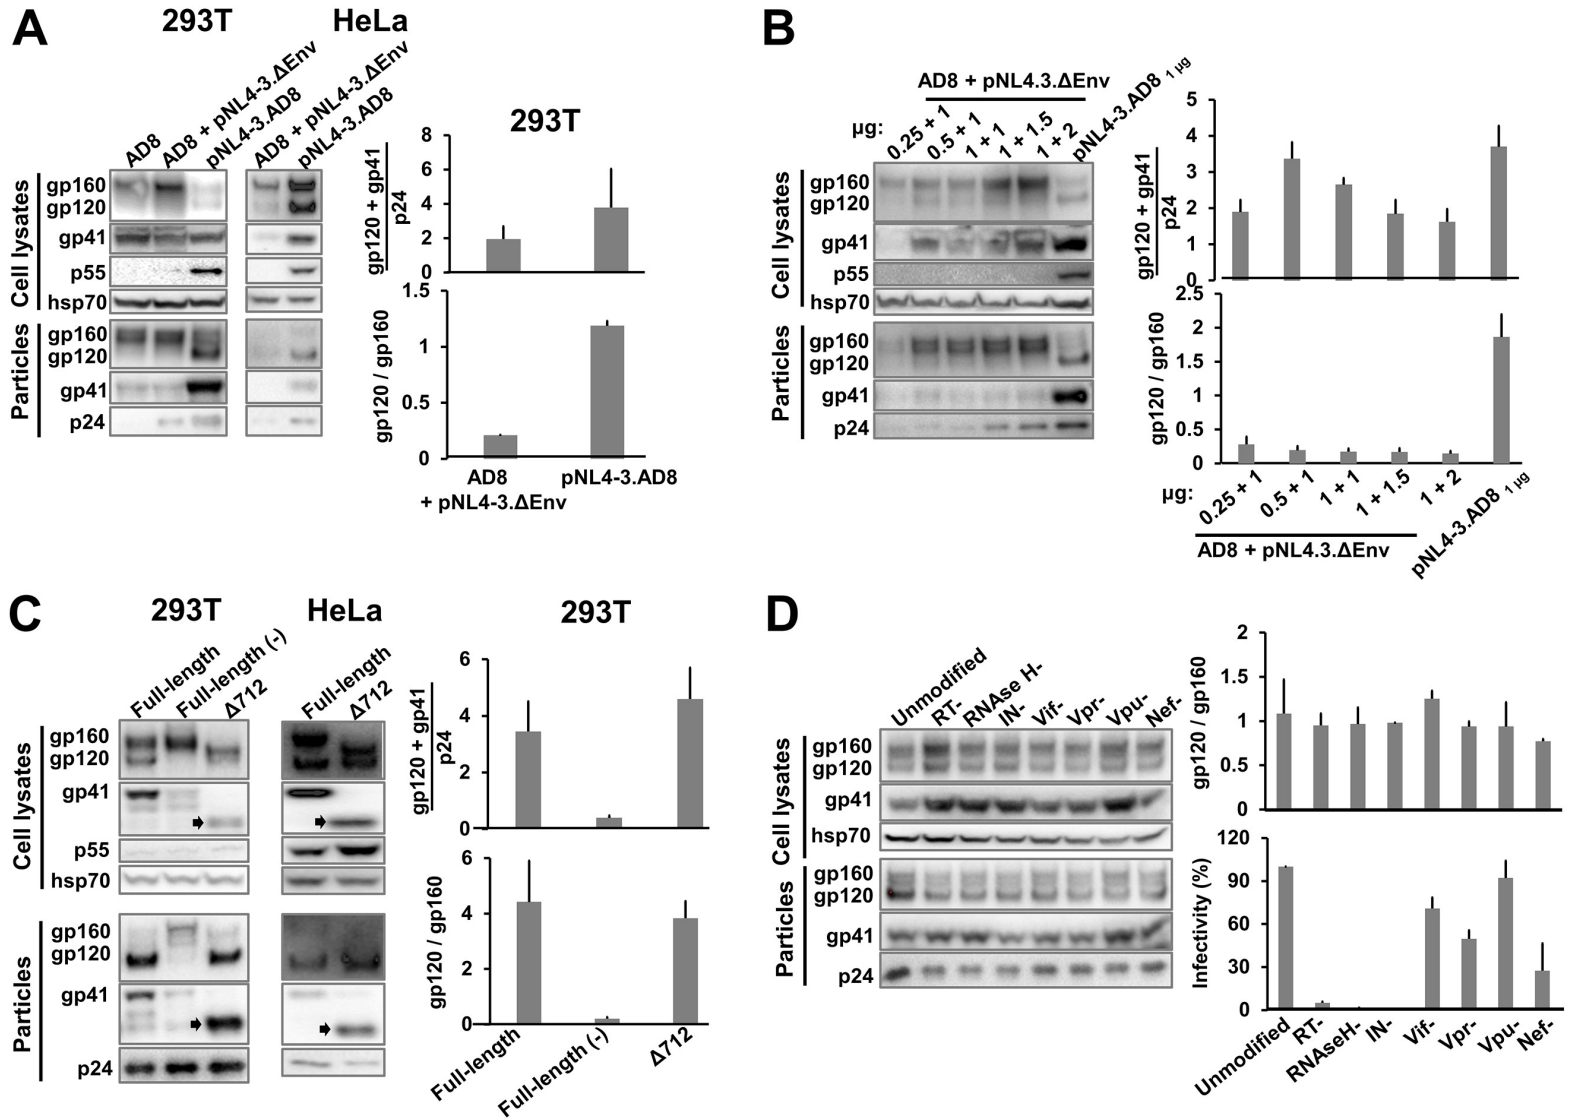

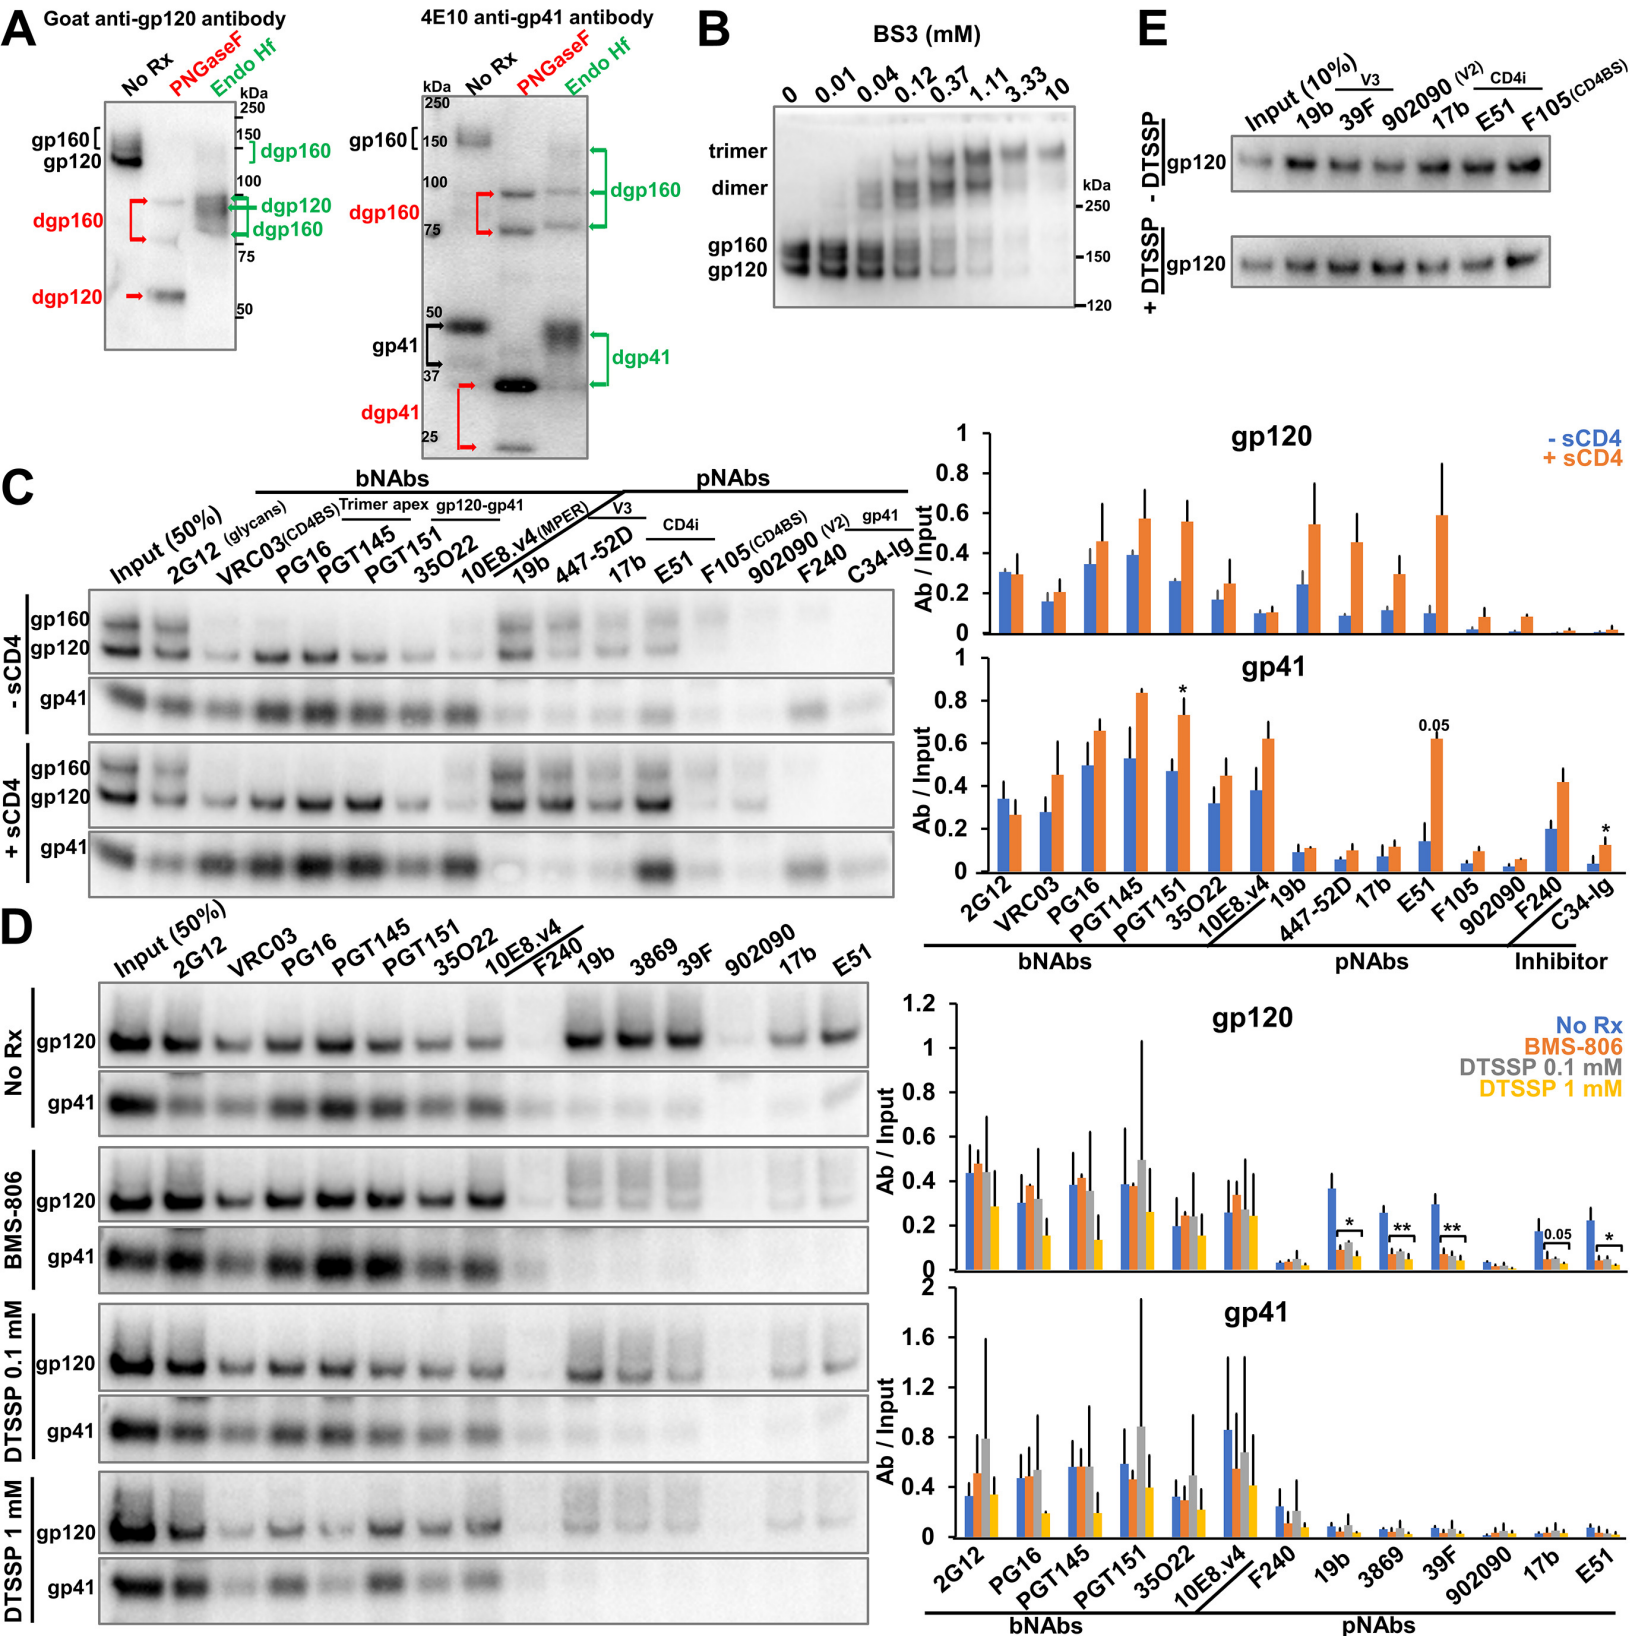



## Fig 3

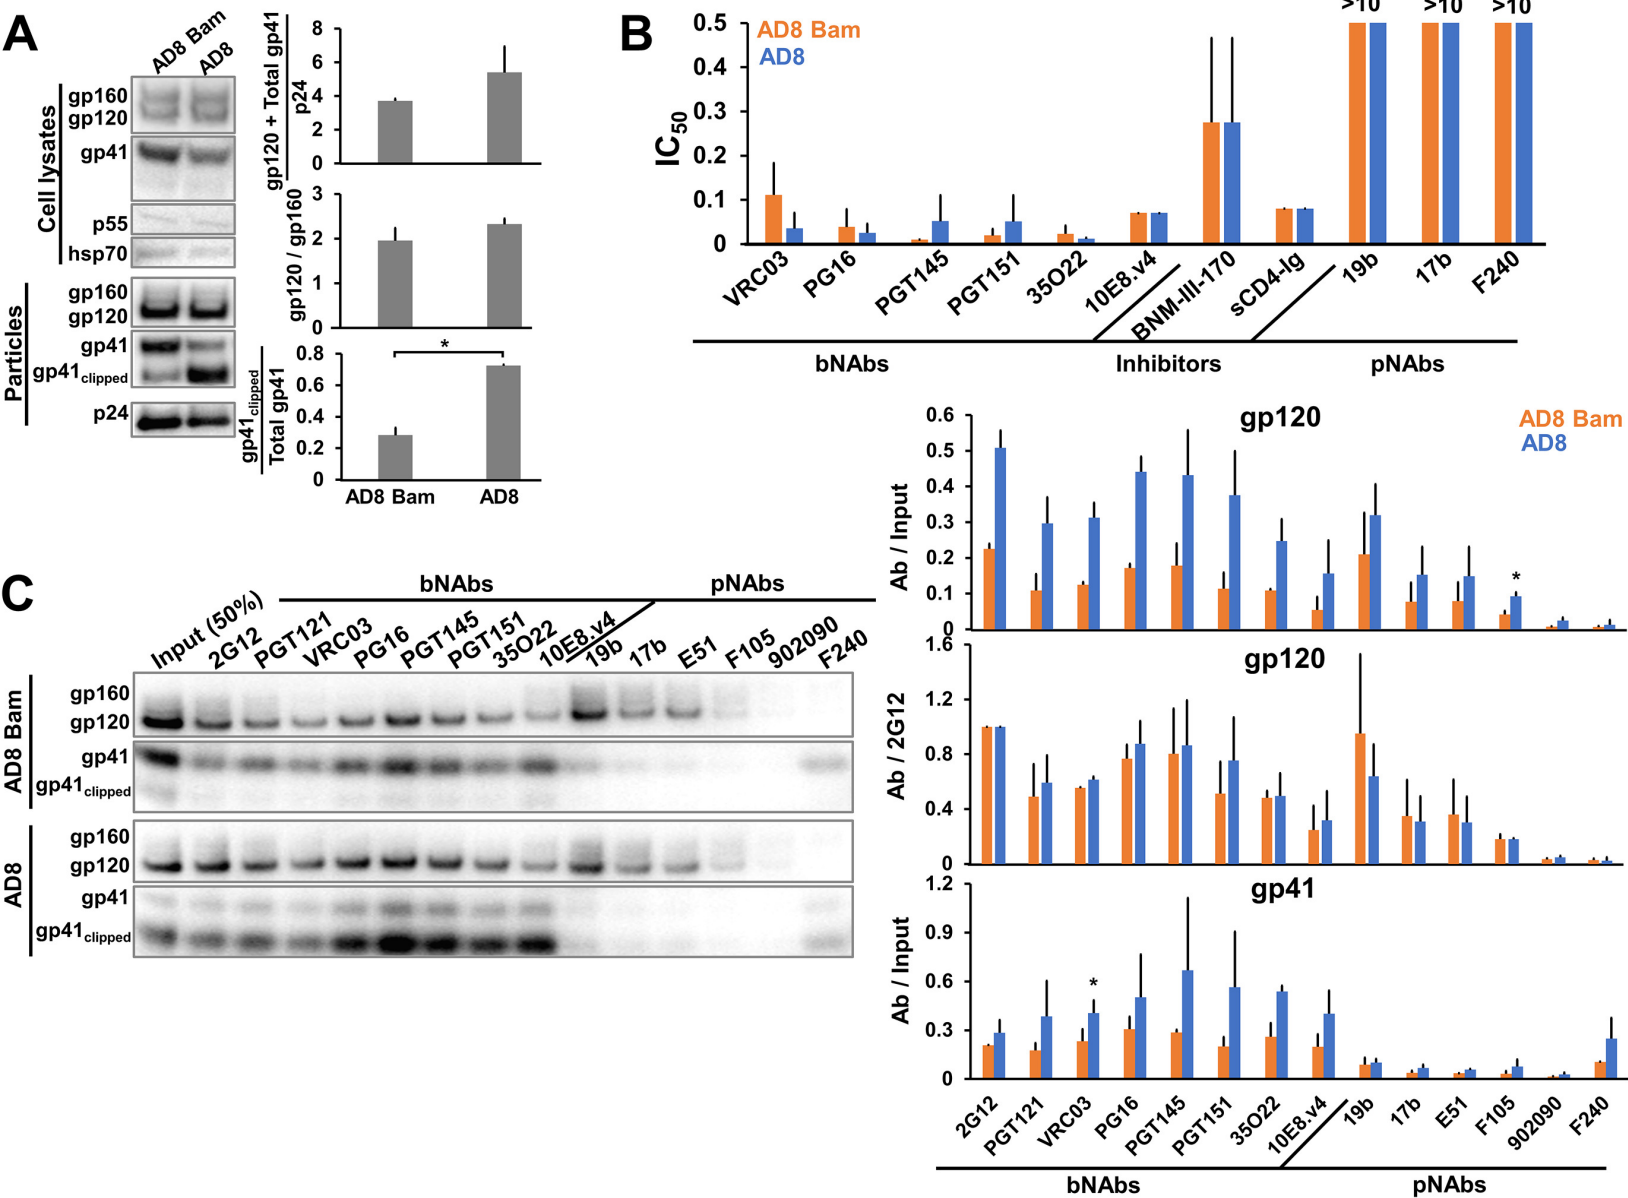

## Fig 4

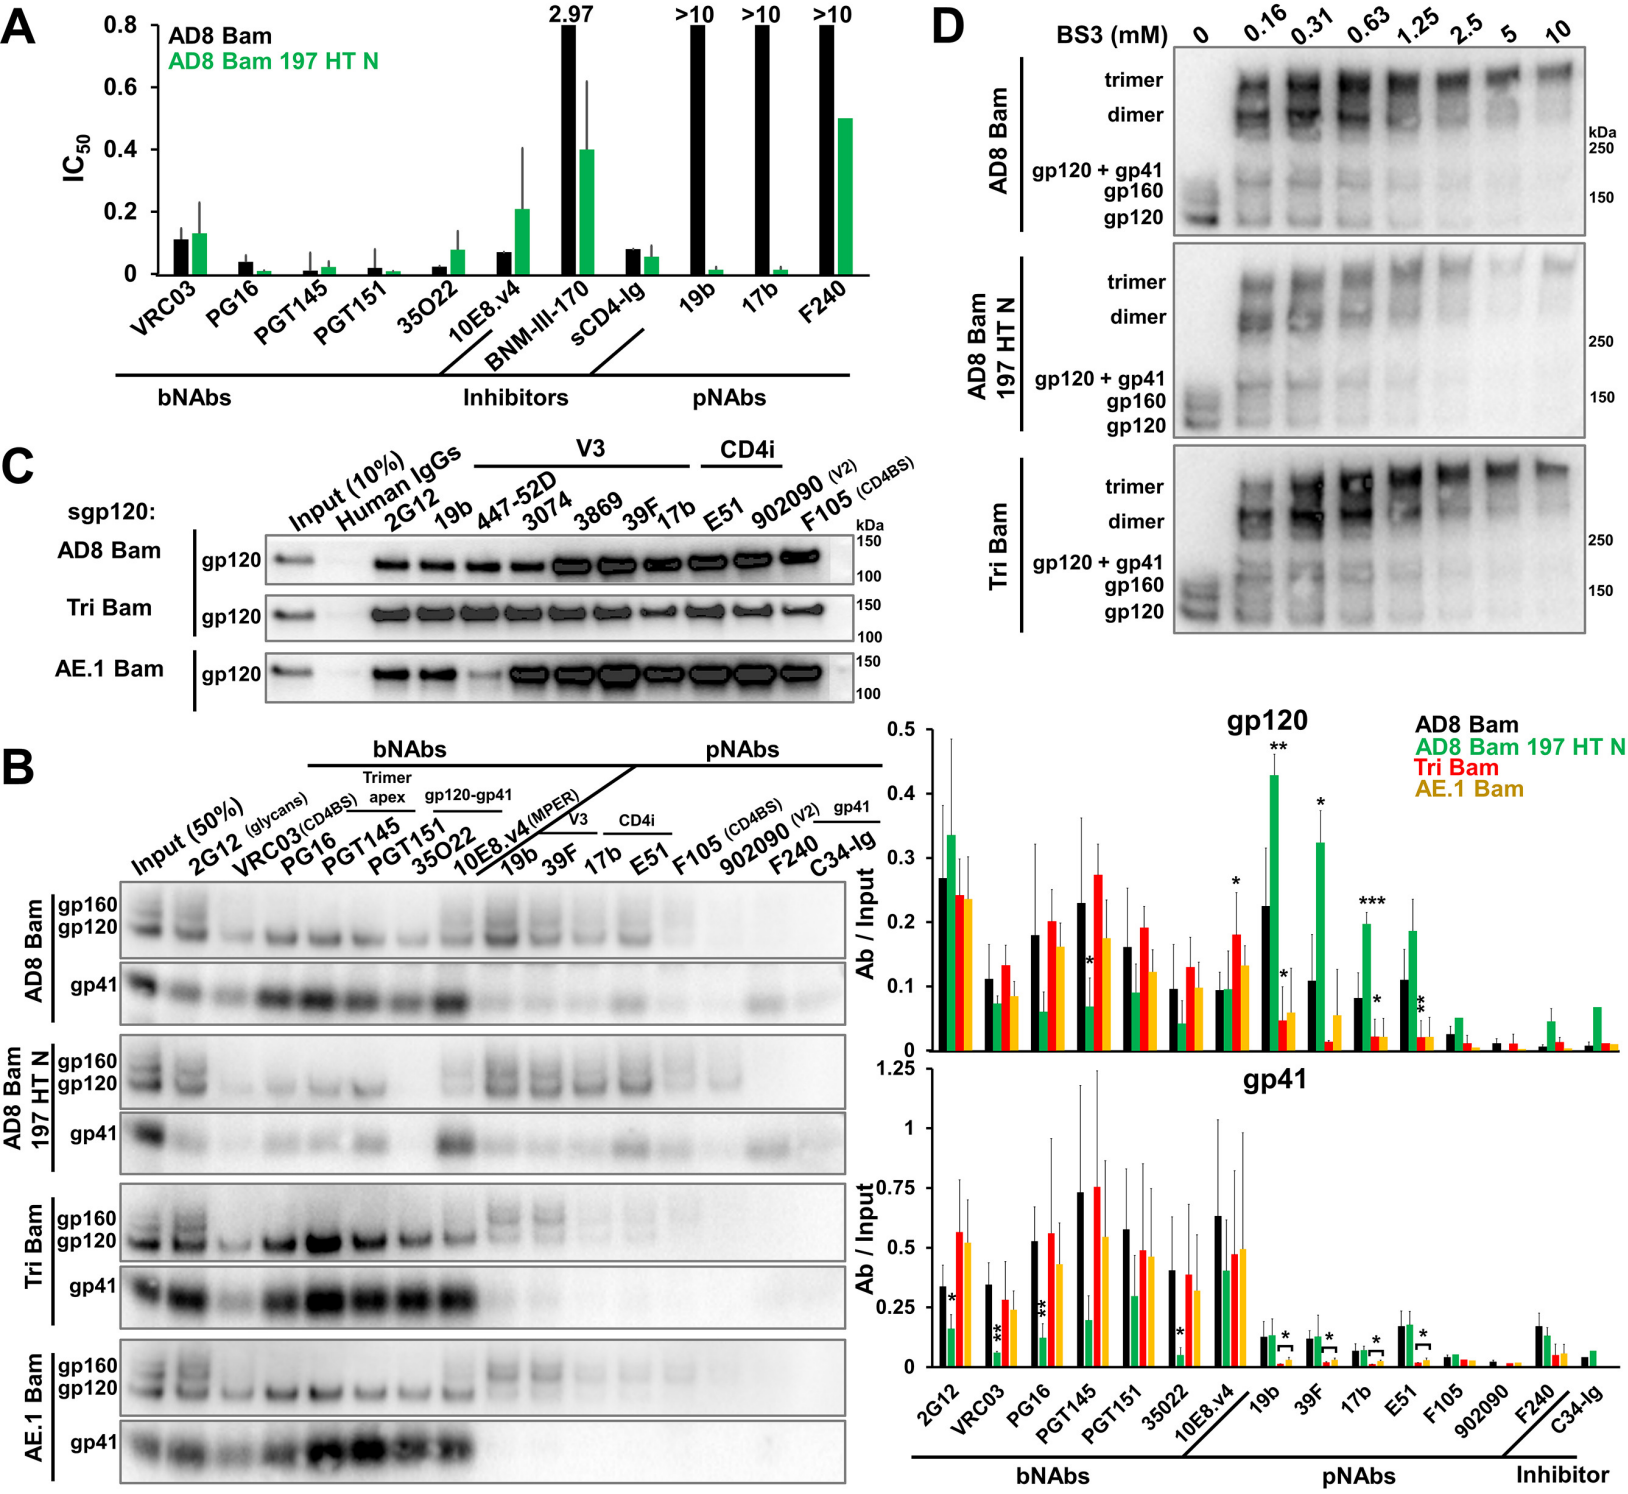

## Fig 5

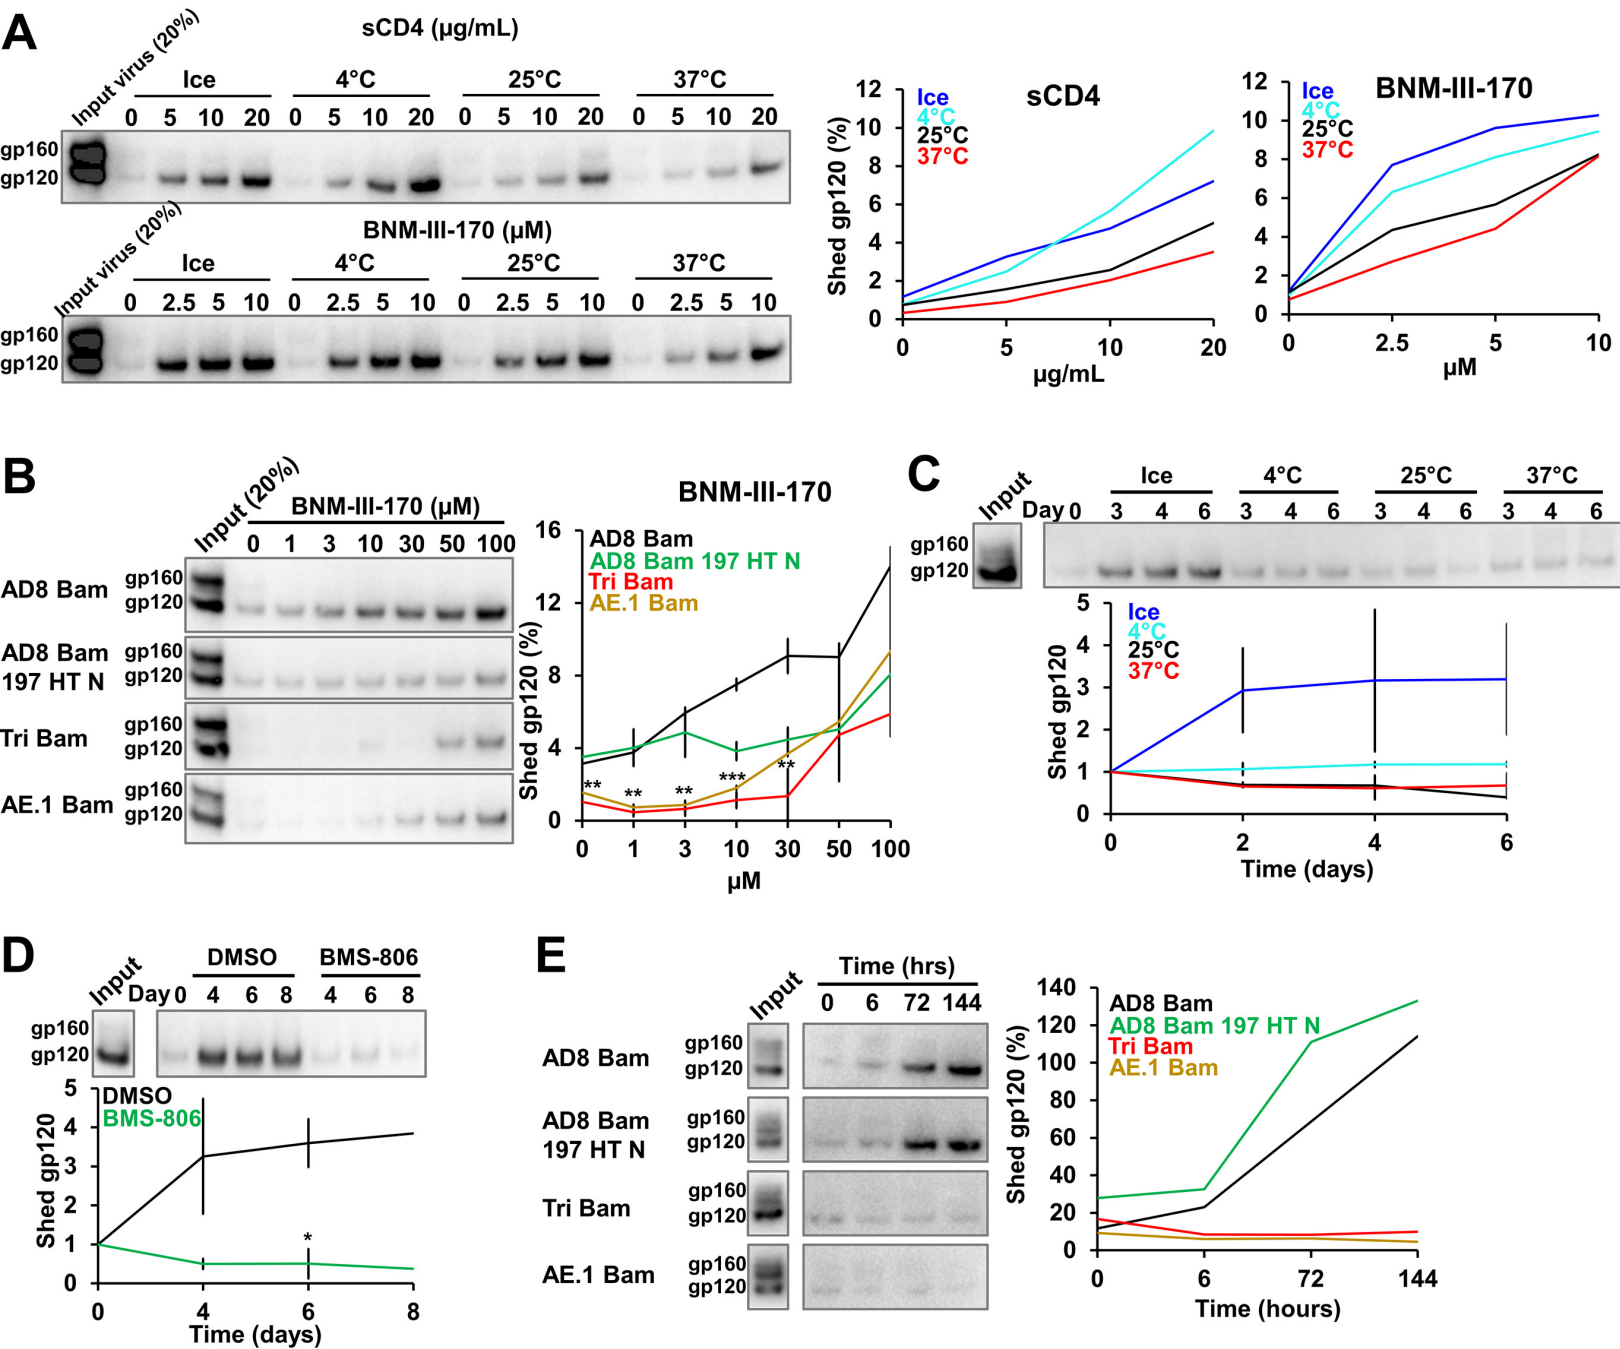

**Fig 6**

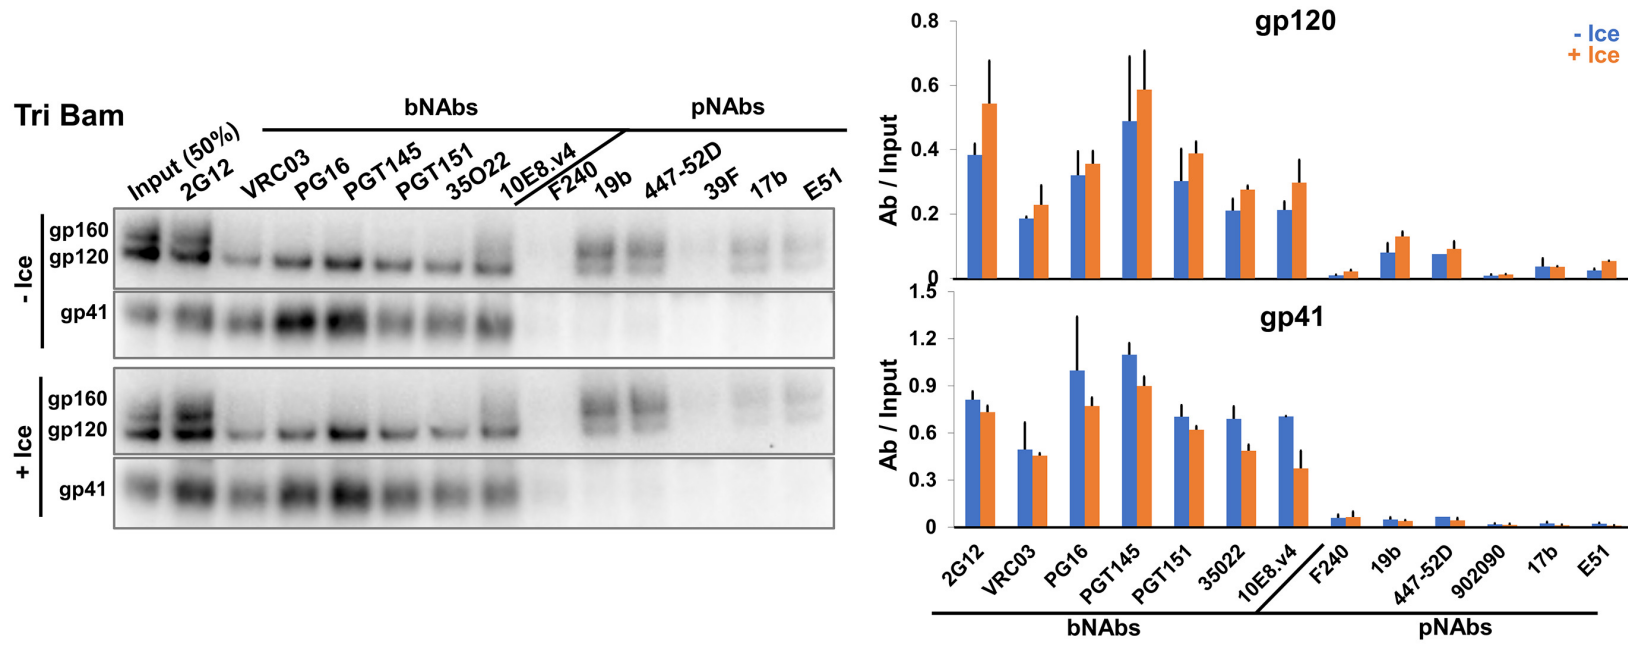

## Fig 7

### A

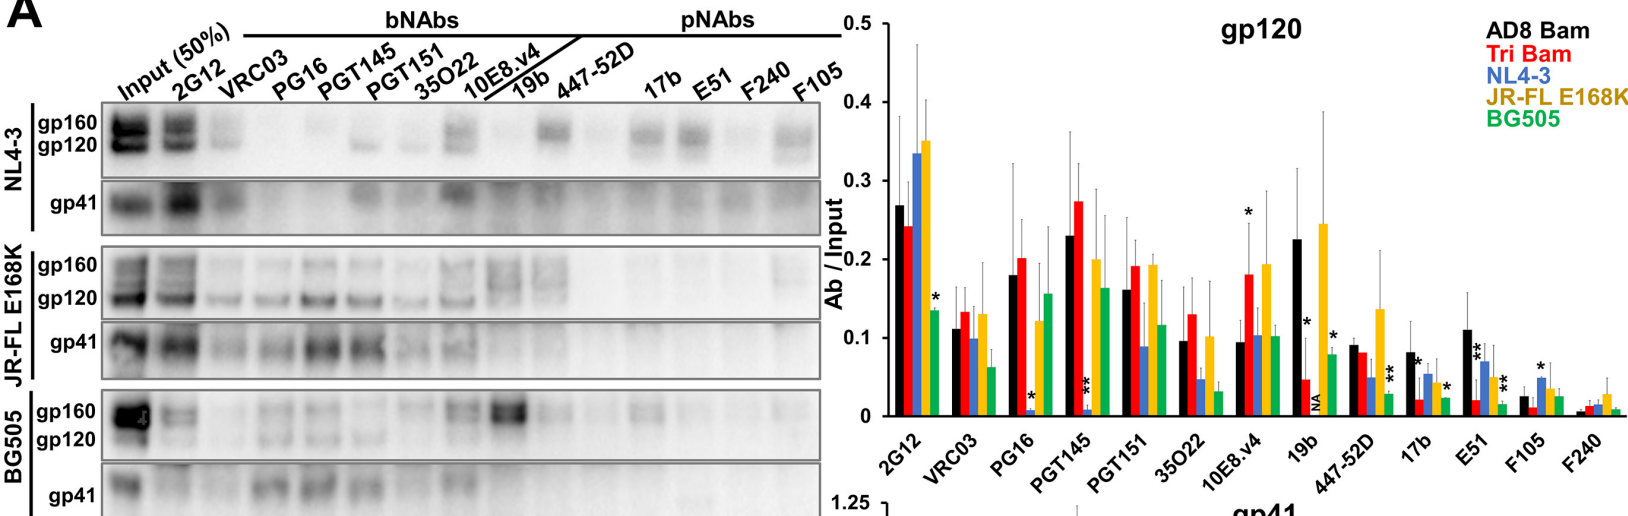

### B

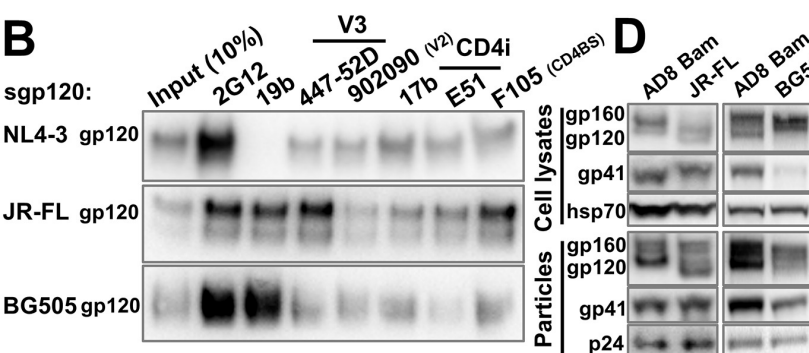

### D

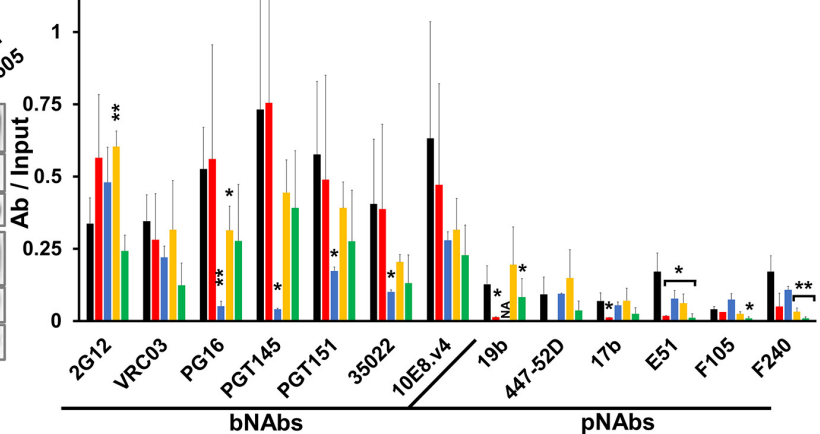

### C

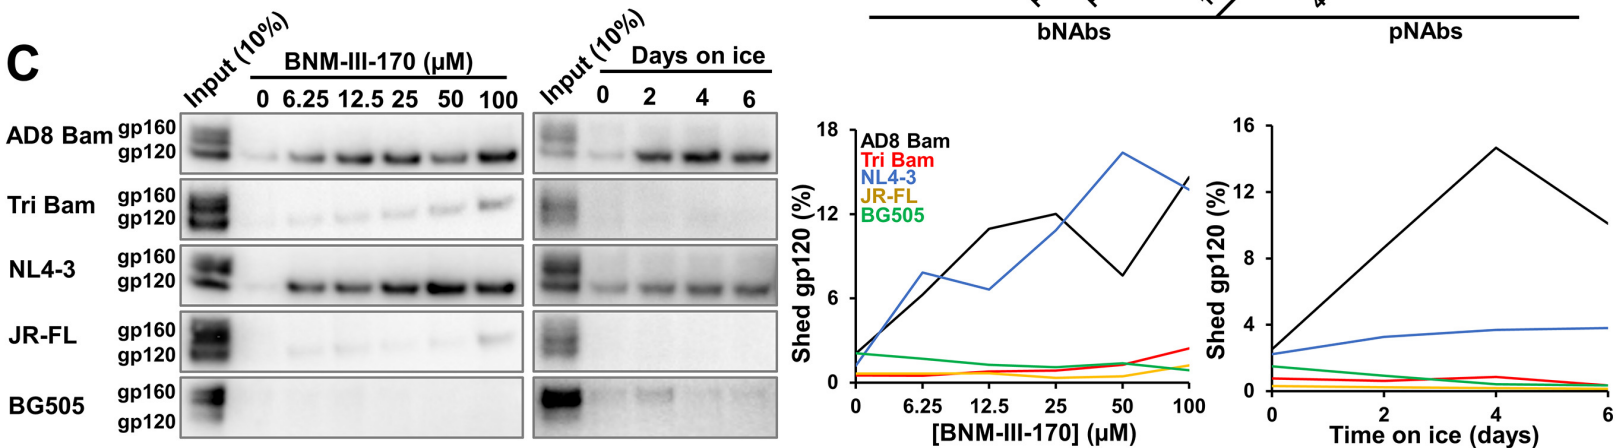

## Fig 8

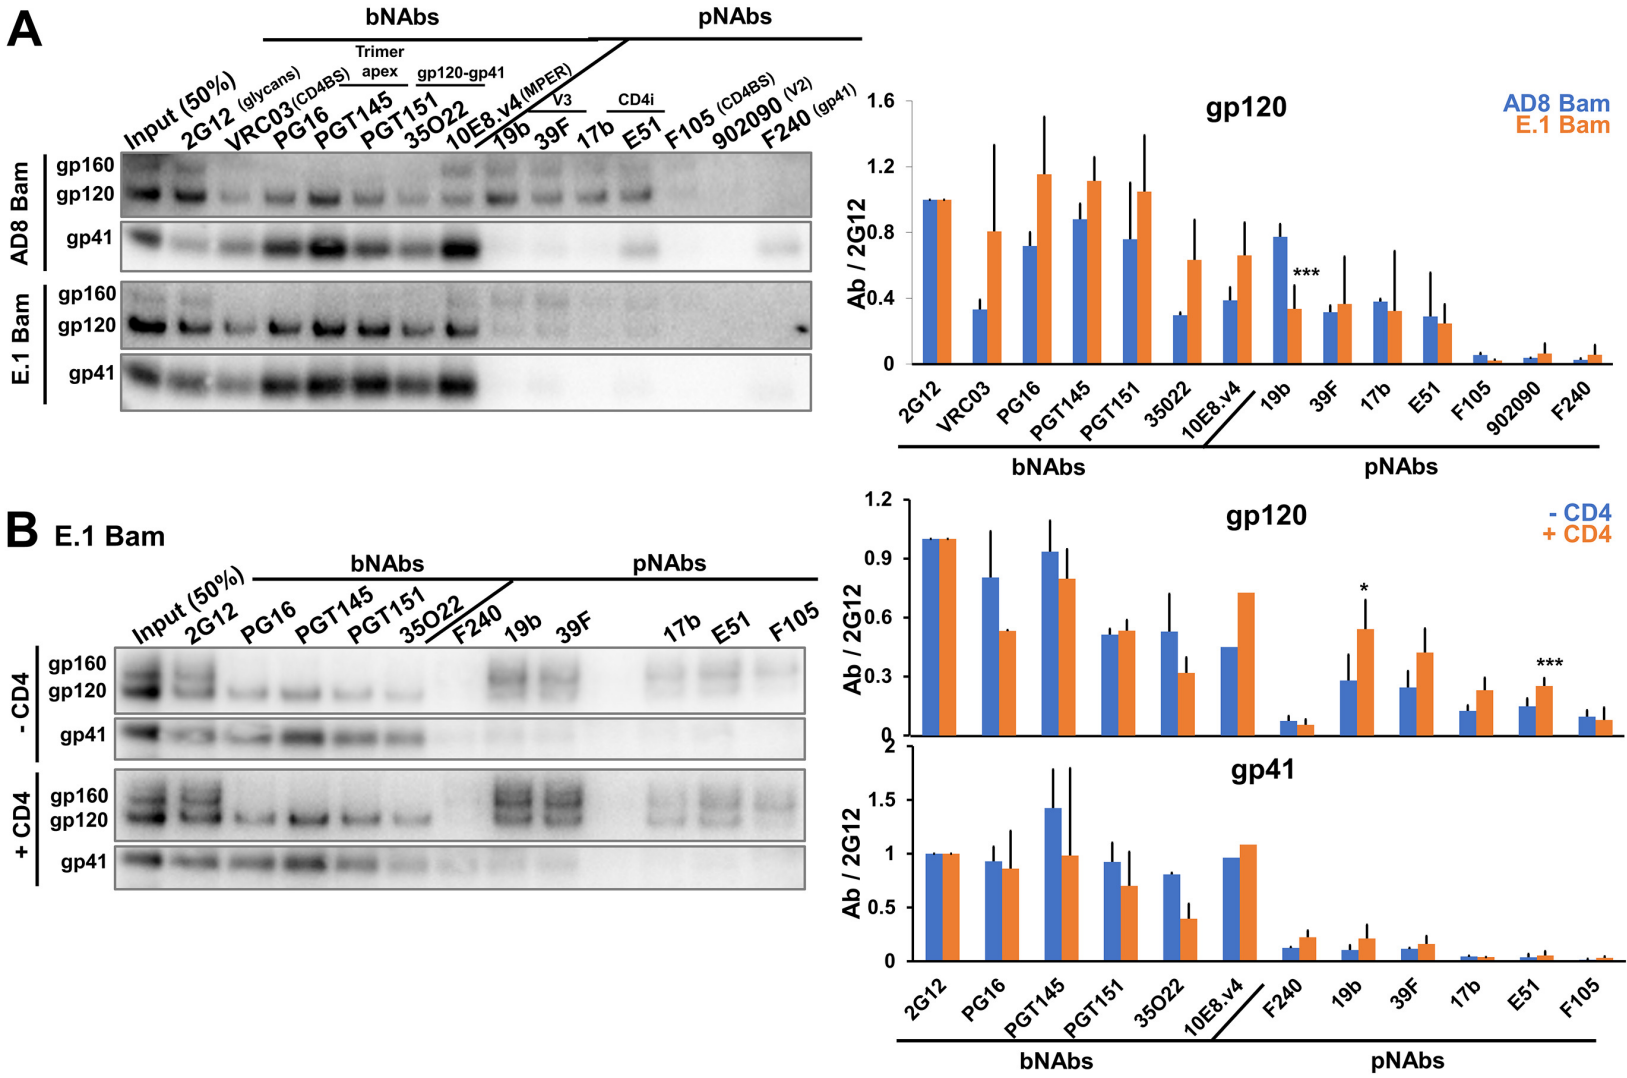

## Fig 9

**A**

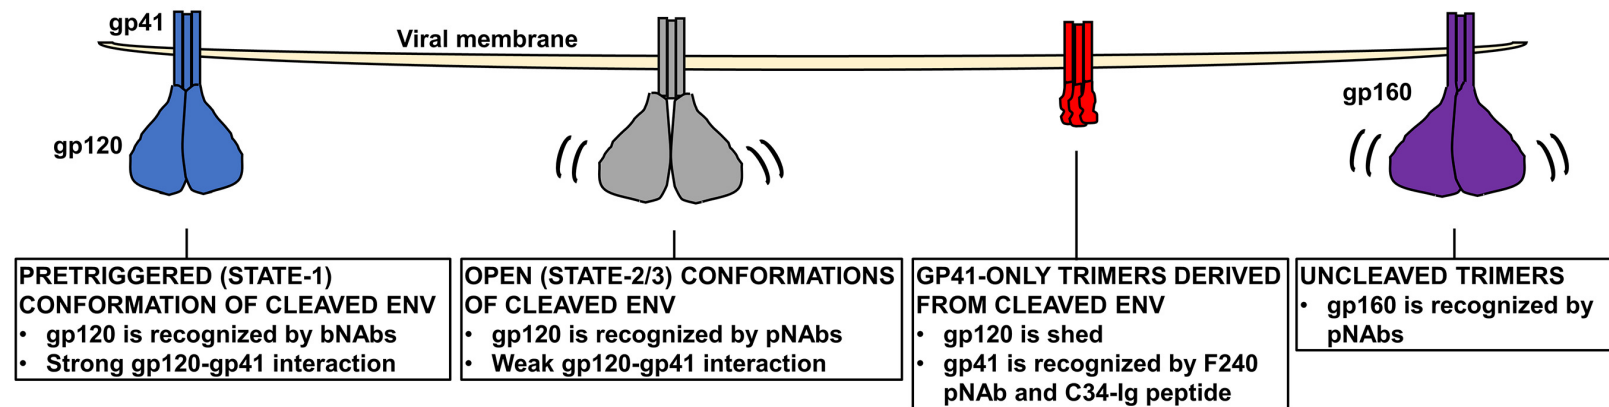

**B**

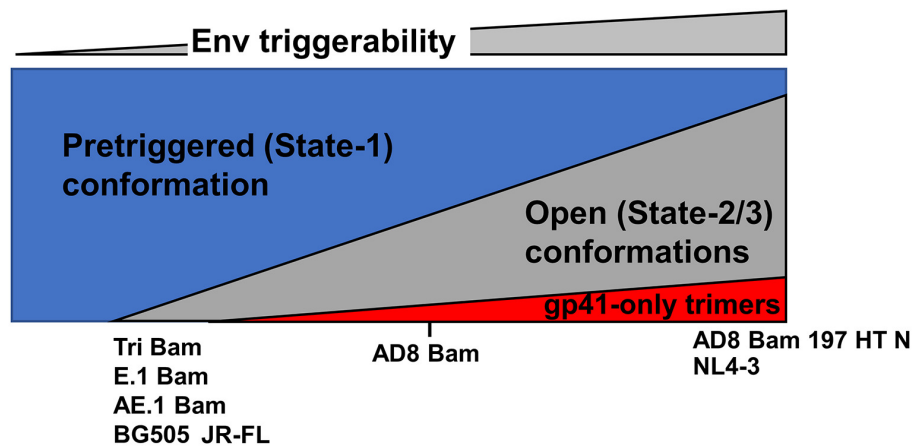

**C**

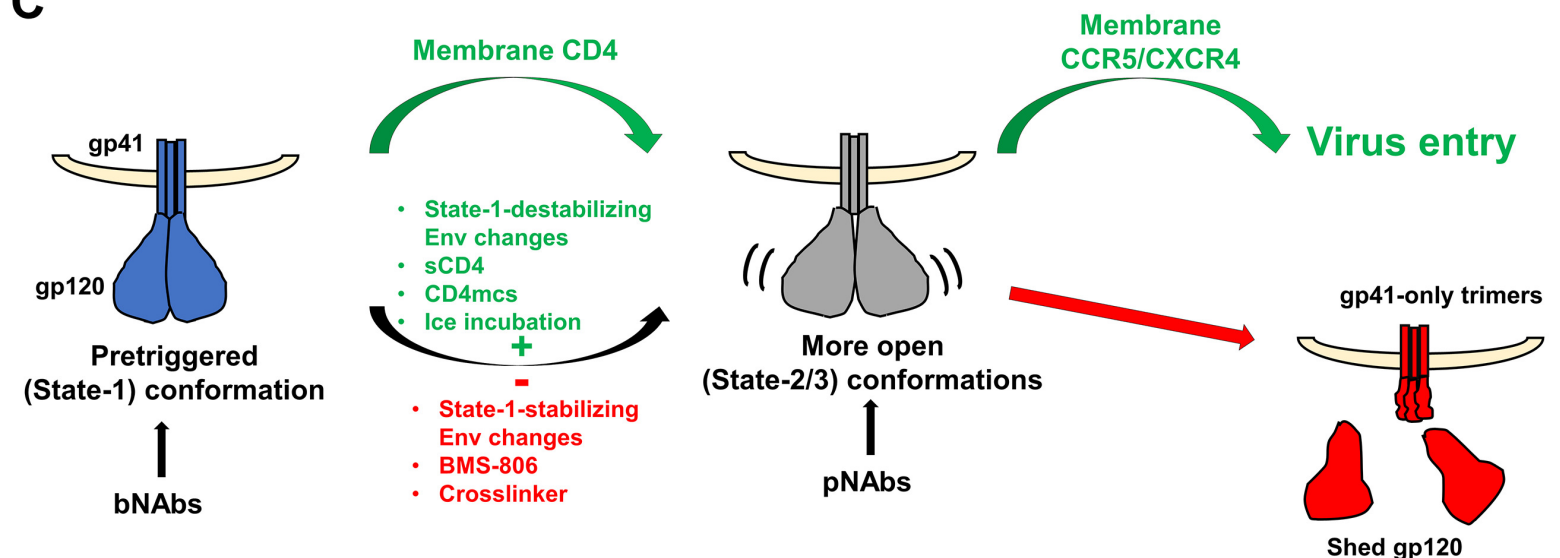

Source: https://www.biorxiv.org/content/10.1101/2022.12.01.518799v1.full.pdf
